# Supplementary material for: Spectroscopic properties of open shell diatomic molecules using Piris natural orbital functionals
Source: Royal Society of Chemistry journal article supplement (doi:10.1039/d0cp05430e), 2021-01-01
Supplement: d0cp05430e1.pdf [file d0cp05430e1.pdf]

## Electronic Supplementary Information

### Spectroscopic properties of open shell diatomic molecules using Piris Natural Orbital Functionals

Raúl Quintero-Monsebaiz,<sup>a</sup> Luis Ignacio Perea-Ramírez,<sup>a</sup> Mario Piris,<sup>\*b,c,d</sup> and Alberto Vela<sup>\*a</sup>

<sup>a</sup> Centro de Investigación y de Estudios Avanzados del Instituto Politécnico Nacional, Av Instituto Politécnico Nacional 2508, San Pedro Zacatenco, Gustavo A. Madero, 07360 Ciudad de México, México. E-mail: avela@cinvestav.mx

<sup>b</sup> Donostia International Physics Center (DIPC), 20018 Donostia, Euskadi, Spain.

<sup>c</sup> Euskal Herriko Unibertsitatea (UPV/EHU), PK 1072, 20080 Donostia, Euskadi, Spain.

<sup>d</sup> Basque Foundation for Science (IKERBASQUE), Plaza Euskadi 5, 48009 Bilbao, Euskadi, Spain. E-mail: mario.piris@ehu.eus

The potential energy surfaces, energy vs. distance corresponding to the nine heteronuclear diatomic molecules reported in the text, namely, BeO, CS, AlF, ClF, NH, NF, PH, CF and NO, calculated with CASSCF, CASPT2, PNOF7s, and NOF-MP2, are reported in this Supplementary material. In several cases, the grids are not the same because it was necessary to decrease the step size to assure that the molecule was in the correct state. Distances are in Å and energies in Hartrees. The tables are available upon request.

**Table S1** Potential energy surface of BeO

| $d$ (Å) | $E$ CASSCF<br>(Hartrees) | $d$ (Å) | $E$ CASPT2<br>(Hartrees) | $d$ (Å) | $E$ PNOF7s<br>(Hartrees) | $d$ (Å) | $E$ NOF-MP2<br>(Hartrees) |
|---------|--------------------------|---------|--------------------------|---------|--------------------------|---------|---------------------------|
| 5.000   | -89.330754               | 5.000   | -89.490744               | 5.000   | -89.355717               | 4.998   | -89.474363                |
| 4.900   | -89.330758               | 4.900   | -89.490767               | 4.900   | -89.355836               | 4.993   | -89.474386                |
| 4.800   | -89.330763               | 4.800   | -89.490793               | 4.800   | -89.355984               | 4.988   | -89.474409                |
| 4.700   | -89.330769               | 4.700   | -89.490820               | 4.700   | -89.356166               | 4.983   | -89.474433                |
| 4.600   | -89.330776               | 4.600   | -89.490854               | 4.600   | -89.356391               | 4.978   | -89.474457                |
| 4.500   | -89.330784               | 4.500   | -89.490881               | 4.500   | -89.356667               | 4.973   | -89.474481                |
| 4.400   | -89.330794               | 4.400   | -89.490923               | 4.400   | -89.357004               | 4.968   | -89.474506                |
| 4.300   | -89.330806               | 4.300   | -89.490975               | 4.300   | -89.357414               | 4.963   | -89.474531                |
| 4.200   | -89.330821               | 4.200   | -89.491021               | 4.200   | -89.357908               | 4.958   | -89.474556                |
| 4.100   | -89.330839               | 4.100   | -89.491089               | 4.100   | -89.358501               | 4.953   | -89.474582                |
| 4.000   | -89.330862               | 4.000   | -89.491171               | 4.000   | -89.359211               | 4.948   | -89.474608                |
| 3.900   | -89.330891               | 3.900   | -89.491272               | 3.900   | -89.360057               | 4.943   | -89.474633                |
| 3.800   | -89.330927               | 3.800   | -89.491408               | 3.800   | -89.361059               | 4.938   | -89.474659                |
| 3.700   | -89.330974               | 3.700   | -89.491578               | 3.700   | -89.362243               | 4.933   | -89.474686                |
| 3.600   | -89.331033               | 3.600   | -89.491799               | 3.600   | -89.363638               | 4.928   | -89.474712                |
| 3.500   | -89.331111               | 3.500   | -89.492094               | 3.500   | -89.365279               | 4.923   | -89.474739                |
| 3.400   | -89.331212               | 3.400   | -89.492488               | 3.400   | -89.367211               | 4.918   | -89.474765                |
| 3.300   | -89.331347               | 3.300   | -89.493017               | 3.300   | -89.369488               | 4.913   | -89.474792                |
| 3.200   | -89.331527               | 3.200   | -89.493727               | 3.200   | -89.372177               | 4.908   | -89.474819                |
| 3.100   | -89.331770               | 3.100   | -89.494698               | 3.100   | -89.375364               | 4.903   | -89.474845                |
| 3.000   | -89.332101               | 3.000   | -89.495990               | 3.000   | -89.379153               | 4.898   | -89.474872                |
| 2.900   | -89.334643               | 2.900   | -89.503121               | 2.900   | -89.383673               | 4.893   | -89.474899                |
| 2.800   | -89.337427               | 2.800   | -89.507739               | 2.800   | -89.389076               | 4.888   | -89.474926                |
| 2.700   | -89.341989               | 2.700   | -89.515435               | 2.700   | -89.395529               | 4.883   | -89.474953                |
| 2.600   | -89.351010               | 2.600   | -89.529113               | 2.600   | -89.403197               | 4.878   | -89.474980                |
| 2.500   | -89.362642               | 2.500   | -89.541077               | 2.500   | -89.412217               | 4.873   | -89.475007                |
| 2.400   | -89.375552               | 2.400   | -89.554241               | 2.400   | -89.422661               | 4.868   | -89.475034                |
| 2.300   | -89.389674               | 2.300   | -89.568800               | 2.300   | -89.434536               | 4.863   | -89.475062                |
| 2.200   | -89.405063               | 2.200   | -89.585022               | 2.200   | -89.447761               | 4.858   | -89.475089                |
| 2.100   | -89.421957               | 2.100   | -89.602954               | 2.100   | -89.462157               | 4.853   | -89.475117                |
| 2.000   | -89.440566               | 2.000   | -89.621372               | 2.000   | -89.477426               | 4.848   | -89.475145                |
| 1.900   | -89.460830               | 1.900   | -89.640630               | 1.900   | -89.490297               | 4.843   | -89.475173                |
| 1.800   | -89.482591               | 1.800   | -89.661005               | 1.880   | -89.493688               | 4.838   | -89.475201                |
| 1.700   | -89.505349               | 1.700   | -89.682261               | 1.860   | -89.497061               | 4.833   | -89.475230                |
| 1.600   | -89.527952               | 1.600   | -89.703483               | 1.840   | -89.500408               | 4.828   | -89.475259                |
| 1.500   | -89.548189               | 1.500   | -89.722646               | 1.820   | -89.503722               | 4.823   | -89.475288                |
| 1.490   | -89.549953               | 1.490   | -89.724332               | 1.800   | -89.506995               | 4.818   | -89.475317                |
| 1.480   | -89.551652               | 1.480   | -89.725953               | 1.780   | -89.510220               | 4.813   | -89.475347                |
| 1.470   | -89.553281               | 1.470   | -89.727509               | 1.760   | -89.513385               | 4.808   | -89.475377                |
| 1.460   | -89.554834               | 1.460   | -89.728994               | 1.740   | -89.516481               | 4.803   | -89.475408                |
| 1.450   | -89.556307               | 1.450   | -89.730404               | 1.720   | -89.519497               | 4.798   | -89.475439                |
| 1.440   | -89.557691               | 1.440   | -89.731731               | 1.700   | -89.522418               | 4.793   | -89.475470                |
| 1.430   | -89.558983               | 1.430   | -89.732970               | 1.680   | -89.525232               | 4.788   | -89.475502                |
| 1.420   | -89.560174               | 1.420   | -89.734115               | 1.660   | -89.527923               | 4.783   | -89.475535                |
| 1.410   | -89.561257               | 1.410   | -89.735158               | 1.640   | -89.530474               | 4.778   | -89.475567                |
| 1.400   | -89.562226               | 1.400   | -89.736093               | 1.620   | -89.532866               | 4.773   | -89.475600                |
| 1.390   | -89.563073               | 1.390   | -89.736911               | 1.600   | -89.535079               | 4.768   | -89.475634                |
| 1.380   | -89.563790               | 1.380   | -89.737605               | 1.580   | -89.537090               | 4.763   | -89.475668                |
| 1.370   | -89.564367               | 1.370   | -89.738166               | 1.560   | -89.538875               | 4.758   | -89.475702                |
| 1.360   | -89.564797               | 1.360   | -89.738586               | 1.540   | -89.540405               | 4.753   | -89.475737                |
| 1.350   | -89.565070               | 1.350   | -89.738846               | 1.520   | -89.541650               | 4.748   | -89.475772                |
| 1.349   | -89.565088               | 1.349   | -89.738871               | 1.500   | -89.542579               | 4.743   | -89.475807                |
| 1.348   | -89.565105               | 1.348   | -89.738881               | 1.480   | -89.543154               | 4.738   | -89.475843                |
| 1.347   | -89.565120               | 1.347   | -89.738902               | 1.460   | -89.543334               | 4.733   | -89.475879                |
| 1.346   | -89.565133               | 1.346   | -89.738909               | 1.440   | -89.543076               | 4.728   | -89.475916                |
| 1.345   | -89.565145               | 1.345   | -89.738927               | 1.420   | -89.542330               | 4.723   | -89.475952                |
| 1.344   | -89.565154               | 1.344   | -89.738931               | 1.400   | -89.541044               | 4.718   | -89.475990                |
| 1.343   | -89.565162               | 1.343   | -89.738946               | 1.300   | -89.534024               | 4.713   | -89.476027                |

*Continued on next page*

Table S1 – Continued from previous page

| $d$ (Å) | $E$ CASSCF<br>(Hartrees) | $d$ (Å) | $E$ CASPT2<br>(Hartrees) | $d$ (Å) | $E$ PNOF7s<br>(Hartrees) | $d$ (Å) | $E$ NOF-MP2<br>(Hartrees) |
|---------|--------------------------|---------|--------------------------|---------|--------------------------|---------|---------------------------|
| 1.342   | -89.565169               | 1.342   | -89.738947               | 1.280   | -89.533177               | 4.708   | -89.476065                |
| 1.341   | -89.565173               | 1.341   | -89.738958               | 1.260   | -89.531333               | 4.703   | -89.476103                |
| 1.340   | -89.565176               | 1.340   | -89.738955               | 1.240   | -89.528374               | 4.698   | -89.476142                |
| 1.339   | -89.565177               | 1.339   | -89.738963               | 1.220   | -89.524171               | 4.693   | -89.476181                |
| 1.338   | -89.565176               | 1.338   | -89.738957               | 1.200   | -89.518583               | 4.688   | -89.476220                |
| 1.337   | -89.565174               | 1.337   | -89.738961               | 1.180   | -89.511452               | 4.683   | -89.476260                |
| 1.336   | -89.565169               | 1.336   | -89.738951               | 1.160   | -89.502606               | 4.678   | -89.476300                |
| 1.335   | -89.565163               | 1.335   | -89.738952               | 1.140   | -89.491853               | 4.673   | -89.476340                |
| 1.334   | -89.565155               | 1.334   | -89.738939               | 1.120   | -89.478983               | 4.668   | -89.476381                |
| 1.333   | -89.565146               | 1.333   | -89.738937               | 1.100   | -89.463763               | 4.663   | -89.476422                |
| 1.332   | -89.565134               | 1.332   | -89.738923               | 1.080   | -89.445932               | 4.658   | -89.476464                |
| 1.331   | -89.565120               | 1.331   | -89.738917               | 1.060   | -89.425206               | 4.653   | -89.476506                |
| 1.330   | -89.565105               | 1.330   | -89.738909               | 1.040   | -89.401270               | 4.648   | -89.476548                |
| 1.329   | -89.565088               | 1.329   | -89.738890               | 1.020   | -89.373775               | 4.643   | -89.476591                |
| 1.328   | -89.565068               | 1.328   | -89.738878               | 1.000   | -89.342337               | 4.638   | -89.476634                |
| 1.327   | -89.565047               | 1.327   | -89.738853               |         |                          | 4.633   | -89.476678                |
| 1.326   | -89.565024               | 1.326   | -89.738837               |         |                          | 4.628   | -89.476722                |
| 1.325   | -89.565000               | 1.325   | -89.738808               |         |                          | 4.623   | -89.476766                |
| 1.324   | -89.564973               | 1.324   | -89.738789               |         |                          | 4.618   | -89.476811                |
| 1.323   | -89.564944               | 1.323   | -89.738756               |         |                          | 4.613   | -89.476857                |
| 1.322   | -89.564913               | 1.322   | -89.738732               |         |                          | 4.608   | -89.476903                |
| 1.321   | -89.564881               | 1.321   | -89.738696               |         |                          | 4.603   | -89.476949                |
| 1.320   | -89.564846               | 1.320   | -89.738669               |         |                          | 4.598   | -89.476996                |
| 1.319   | -89.564809               | 1.319   | -89.738628               |         |                          | 4.593   | -89.477044                |
| 1.318   | -89.564770               | 1.318   | -89.738597               |         |                          | 4.588   | -89.477091                |
| 1.317   | -89.564730               | 1.317   | -89.738553               |         |                          | 4.583   | -89.477140                |
| 1.316   | -89.564687               | 1.316   | -89.738518               |         |                          | 4.578   | -89.477189                |
| 1.315   | -89.564642               | 1.315   | -89.738470               |         |                          | 4.573   | -89.477238                |
| 1.314   | -89.564595               | 1.314   | -89.738431               |         |                          | 4.568   | -89.477288                |
| 1.313   | -89.564547               | 1.313   | -89.738379               |         |                          | 4.563   | -89.477338                |
| 1.312   | -89.564495               | 1.312   | -89.738336               |         |                          | 4.558   | -89.477389                |
| 1.311   | -89.564443               | 1.311   | -89.738280               |         |                          | 4.553   | -89.477440                |
| 1.310   | -89.564387               | 1.310   | -89.738233               |         |                          | 4.548   | -89.477491                |
| 1.309   | -89.564330               | 1.309   | -89.738173               |         |                          | 4.543   | -89.477543                |
| 1.308   | -89.564271               | 1.308   | -89.738122               |         |                          | 4.538   | -89.477596                |
| 1.307   | -89.564209               | 1.307   | -89.738057               |         |                          | 4.533   | -89.477648                |
| 1.306   | -89.564145               | 1.306   | -89.738002               |         |                          | 4.528   | -89.477701                |
| 1.305   | -89.564080               | 1.305   | -89.737934               |         |                          | 4.523   | -89.477755                |
| 1.304   | -89.564012               | 1.304   | -89.737874               |         |                          | 4.518   | -89.477808                |
| 1.303   | -89.563941               | 1.303   | -89.737802               |         |                          | 4.513   | -89.477862                |
| 1.302   | -89.563869               | 1.302   | -89.737738               |         |                          | 4.508   | -89.477917                |
| 1.301   | -89.563794               | 1.301   | -89.737661               |         |                          | 4.503   | -89.477972                |
| 1.300   | -89.563718               | 1.300   | -89.737593               |         |                          | 4.498   | -89.478027                |
| 1.290   | -89.562824               | 1.290   | -89.736728               |         |                          | 4.493   | -89.478082                |
| 1.280   | -89.561694               | 1.280   | -89.735641               |         |                          | 4.488   | -89.478138                |
| 1.270   | -89.560313               | 1.270   | -89.734309               |         |                          | 4.483   | -89.478194                |
| 1.260   | -89.558666               | 1.260   | -89.732720               |         |                          | 4.478   | -89.478250                |
| 1.250   | -89.556739               | 1.250   | -89.730858               |         |                          | 4.473   | -89.478307                |
| 1.240   | -89.554516               | 1.240   | -89.728707               |         |                          | 4.468   | -89.478364                |
| 1.230   | -89.551979               | 1.230   | -89.726250               |         |                          | 4.463   | -89.478422                |
| 1.220   | -89.549111               | 1.220   | -89.723470               |         |                          | 4.458   | -89.478480                |
| 1.210   | -89.545893               | 1.210   | -89.720348               |         |                          | 4.453   | -89.478538                |
| 1.200   | -89.542307               | 1.200   | -89.716864               |         |                          | 4.448   | -89.478597                |
| 1.180   | -89.533943               | 1.180   | -89.708730               |         |                          | 4.443   | -89.478657                |
| 1.160   | -89.523843               | 1.160   | -89.698893               |         |                          | 4.438   | -89.478717                |
| 1.140   | -89.511811               | 1.140   | -89.687158               |         |                          | 4.433   | -89.478777                |
| 1.120   | -89.497632               | 1.120   | -89.673311               |         |                          | 4.428   | -89.478838                |
| 1.100   | -89.481068               | 1.100   | -89.657116               |         |                          | 4.423   | -89.478899                |
| 1.080   | -89.461856               | 1.080   | -89.638312               |         |                          | 4.418   | -89.478961                |

Continued on next page

Table S1 – Continued from previous page

| $d$ (Å) | $E$ CASSCF<br>(Hartrees) | $d$ (Å) | $E$ CASPT2<br>(Hartrees) | $d$ (Å) | $E$ PNOF7s<br>(Hartrees) | $d$ (Å) | $E$ NOF-MP2<br>(Hartrees) |
|---------|--------------------------|---------|--------------------------|---------|--------------------------|---------|---------------------------|
| 1.060   | -89.439707               | 1.060   | -89.616611               |         |                          | 4.413   | -89.479024                |
| 1.040   | -89.414303               | 1.040   | -89.591697               |         |                          | 4.408   | -89.479087                |
| 1.020   | -89.385292               | 1.020   | -89.563221               |         |                          | 4.403   | -89.479150                |
| 1.000   | -89.352287               | 1.000   | -89.530799               |         |                          | 4.398   | -89.479215                |
|         |                          |         |                          |         |                          | 4.393   | -89.479280                |
|         |                          |         |                          |         |                          | 4.388   | -89.479345                |
|         |                          |         |                          |         |                          | 4.383   | -89.479411                |
|         |                          |         |                          |         |                          | 4.378   | -89.479478                |
|         |                          |         |                          |         |                          | 4.373   | -89.479545                |
|         |                          |         |                          |         |                          | 4.368   | -89.479613                |
|         |                          |         |                          |         |                          | 4.363   | -89.479681                |
|         |                          |         |                          |         |                          | 4.358   | -89.479750                |
|         |                          |         |                          |         |                          | 4.353   | -89.479820                |
|         |                          |         |                          |         |                          | 4.348   | -89.479890                |
|         |                          |         |                          |         |                          | 4.343   | -89.479960                |
|         |                          |         |                          |         |                          | 4.338   | -89.480032                |
|         |                          |         |                          |         |                          | 4.333   | -89.480103                |
|         |                          |         |                          |         |                          | 4.328   | -89.480176                |
|         |                          |         |                          |         |                          | 4.323   | -89.480248                |
|         |                          |         |                          |         |                          | 4.318   | -89.480322                |
|         |                          |         |                          |         |                          | 4.313   | -89.480395                |
|         |                          |         |                          |         |                          | 4.308   | -89.480470                |
|         |                          |         |                          |         |                          | 4.303   | -89.480544                |
|         |                          |         |                          |         |                          | 4.298   | -89.480620                |
|         |                          |         |                          |         |                          | 4.293   | -89.480696                |
|         |                          |         |                          |         |                          | 4.288   | -89.480772                |
|         |                          |         |                          |         |                          | 4.283   | -89.480849                |
|         |                          |         |                          |         |                          | 4.278   | -89.480926                |
|         |                          |         |                          |         |                          | 4.273   | -89.481004                |
|         |                          |         |                          |         |                          | 4.268   | -89.481082                |
|         |                          |         |                          |         |                          | 4.263   | -89.481161                |
|         |                          |         |                          |         |                          | 4.258   | -89.481240                |
|         |                          |         |                          |         |                          | 4.253   | -89.481320                |
|         |                          |         |                          |         |                          | 4.248   | -89.481400                |
|         |                          |         |                          |         |                          | 4.243   | -89.481481                |
|         |                          |         |                          |         |                          | 4.238   | -89.481563                |
|         |                          |         |                          |         |                          | 4.233   | -89.481645                |
|         |                          |         |                          |         |                          | 4.228   | -89.481728                |
|         |                          |         |                          |         |                          | 4.223   | -89.481811                |
|         |                          |         |                          |         |                          | 4.218   | -89.481895                |
|         |                          |         |                          |         |                          | 4.213   | -89.481980                |
|         |                          |         |                          |         |                          | 4.208   | -89.482065                |
|         |                          |         |                          |         |                          | 4.203   | -89.482150                |
|         |                          |         |                          |         |                          | 4.198   | -89.482237                |
|         |                          |         |                          |         |                          | 4.193   | -89.482324                |
|         |                          |         |                          |         |                          | 4.188   | -89.482411                |
|         |                          |         |                          |         |                          | 4.183   | -89.482499                |
|         |                          |         |                          |         |                          | 4.178   | -89.482588                |
|         |                          |         |                          |         |                          | 4.173   | -89.482678                |
|         |                          |         |                          |         |                          | 4.168   | -89.482768                |
|         |                          |         |                          |         |                          | 4.163   | -89.482858                |
|         |                          |         |                          |         |                          | 4.158   | -89.482950                |
|         |                          |         |                          |         |                          | 4.153   | -89.483042                |
|         |                          |         |                          |         |                          | 4.148   | -89.483134                |
|         |                          |         |                          |         |                          | 4.143   | -89.483228                |
|         |                          |         |                          |         |                          | 4.138   | -89.483322                |
|         |                          |         |                          |         |                          | 4.133   | -89.483416                |
|         |                          |         |                          |         |                          | 4.128   | -89.483511                |
|         |                          |         |                          |         |                          | 4.123   | -89.483607                |

Continued on next page

Table S1 – Continued from previous page

| $d$ (Å) | $E$ CASSCF<br>(Hartrees) | $d$ (Å) | $E$ CASPT2<br>(Hartrees) | $d$ (Å) | $E$ PNOF7s<br>(Hartrees) | $d$ (Å) | $E$ NOF-MP2<br>(Hartrees) |
|---------|--------------------------|---------|--------------------------|---------|--------------------------|---------|---------------------------|
|         |                          |         |                          |         |                          | 4.118   | -89.483704                |
|         |                          |         |                          |         |                          | 4.113   | -89.483801                |
|         |                          |         |                          |         |                          | 4.108   | -89.483899                |
|         |                          |         |                          |         |                          | 4.103   | -89.483997                |
|         |                          |         |                          |         |                          | 4.098   | -89.484096                |
|         |                          |         |                          |         |                          | 4.093   | -89.484196                |
|         |                          |         |                          |         |                          | 4.088   | -89.484296                |
|         |                          |         |                          |         |                          | 4.083   | -89.484397                |
|         |                          |         |                          |         |                          | 4.078   | -89.484499                |
|         |                          |         |                          |         |                          | 4.073   | -89.484602                |
|         |                          |         |                          |         |                          | 4.068   | -89.484704                |
|         |                          |         |                          |         |                          | 4.063   | -89.484808                |
|         |                          |         |                          |         |                          | 4.058   | -89.484912                |
|         |                          |         |                          |         |                          | 4.053   | -89.485017                |
|         |                          |         |                          |         |                          | 4.048   | -89.485122                |
|         |                          |         |                          |         |                          | 4.043   | -89.485228                |
|         |                          |         |                          |         |                          | 4.038   | -89.485335                |
|         |                          |         |                          |         |                          | 4.033   | -89.485442                |
|         |                          |         |                          |         |                          | 4.028   | -89.485549                |
|         |                          |         |                          |         |                          | 4.023   | -89.485658                |
|         |                          |         |                          |         |                          | 4.018   | -89.485766                |
|         |                          |         |                          |         |                          | 4.013   | -89.485876                |
|         |                          |         |                          |         |                          | 4.008   | -89.485985                |
|         |                          |         |                          |         |                          | 4.003   | -89.486096                |
|         |                          |         |                          |         |                          | 3.997   | -89.486206                |
|         |                          |         |                          |         |                          | 3.992   | -89.486318                |
|         |                          |         |                          |         |                          | 3.987   | -89.486430                |
|         |                          |         |                          |         |                          | 3.982   | -89.486542                |
|         |                          |         |                          |         |                          | 3.977   | -89.486655                |
|         |                          |         |                          |         |                          | 3.972   | -89.486768                |
|         |                          |         |                          |         |                          | 3.967   | -89.486883                |
|         |                          |         |                          |         |                          | 3.962   | -89.486997                |
|         |                          |         |                          |         |                          | 3.957   | -89.487113                |
|         |                          |         |                          |         |                          | 3.952   | -89.487229                |
|         |                          |         |                          |         |                          | 3.947   | -89.487345                |
|         |                          |         |                          |         |                          | 3.942   | -89.487462                |
|         |                          |         |                          |         |                          | 3.937   | -89.487580                |
|         |                          |         |                          |         |                          | 3.932   | -89.487699                |
|         |                          |         |                          |         |                          | 3.927   | -89.487818                |
|         |                          |         |                          |         |                          | 3.922   | -89.487938                |
|         |                          |         |                          |         |                          | 3.917   | -89.488059                |
|         |                          |         |                          |         |                          | 3.912   | -89.488180                |
|         |                          |         |                          |         |                          | 3.907   | -89.488302                |
|         |                          |         |                          |         |                          | 3.902   | -89.488425                |
|         |                          |         |                          |         |                          | 3.897   | -89.488549                |
|         |                          |         |                          |         |                          | 3.892   | -89.488674                |
|         |                          |         |                          |         |                          | 3.887   | -89.488799                |
|         |                          |         |                          |         |                          | 3.882   | -89.488925                |
|         |                          |         |                          |         |                          | 3.877   | -89.489052                |
|         |                          |         |                          |         |                          | 3.872   | -89.489179                |
|         |                          |         |                          |         |                          | 3.867   | -89.489307                |
|         |                          |         |                          |         |                          | 3.862   | -89.489436                |
|         |                          |         |                          |         |                          | 3.857   | -89.489565                |
|         |                          |         |                          |         |                          | 3.852   | -89.489695                |
|         |                          |         |                          |         |                          | 3.847   | -89.489825                |
|         |                          |         |                          |         |                          | 3.842   | -89.489956                |
|         |                          |         |                          |         |                          | 3.837   | -89.490087                |
|         |                          |         |                          |         |                          | 3.832   | -89.490219                |
|         |                          |         |                          |         |                          | 3.827   | -89.490351                |

Continued on next page

Table S1 – Continued from previous page

| $d$ (Å) | $E$ CASSCF<br>(Hartrees) | $d$ (Å) | $E$ CASPT2<br>(Hartrees) | $d$ (Å) | $E$ PNOF7s<br>(Hartrees) | $d$ (Å) | $E$ NOF-MP2<br>(Hartrees) |
|---------|--------------------------|---------|--------------------------|---------|--------------------------|---------|---------------------------|
|         |                          |         |                          |         |                          | 3.822   | -89.490483                |
|         |                          |         |                          |         |                          | 3.817   | -89.490616                |
|         |                          |         |                          |         |                          | 3.812   | -89.490749                |
|         |                          |         |                          |         |                          | 3.807   | -89.490883                |
|         |                          |         |                          |         |                          | 3.802   | -89.491016                |
|         |                          |         |                          |         |                          | 3.797   | -89.491150                |
|         |                          |         |                          |         |                          | 3.792   | -89.491284                |
|         |                          |         |                          |         |                          | 3.787   | -89.491419                |
|         |                          |         |                          |         |                          | 3.782   | -89.491554                |
|         |                          |         |                          |         |                          | 3.777   | -89.491689                |
|         |                          |         |                          |         |                          | 3.772   | -89.491825                |
|         |                          |         |                          |         |                          | 3.767   | -89.491961                |
|         |                          |         |                          |         |                          | 3.762   | -89.492097                |
|         |                          |         |                          |         |                          | 3.757   | -89.492234                |
|         |                          |         |                          |         |                          | 3.752   | -89.492372                |
|         |                          |         |                          |         |                          | 3.747   | -89.492510                |
|         |                          |         |                          |         |                          | 3.742   | -89.492649                |
|         |                          |         |                          |         |                          | 3.737   | -89.492789                |
|         |                          |         |                          |         |                          | 3.732   | -89.492929                |
|         |                          |         |                          |         |                          | 3.727   | -89.493071                |
|         |                          |         |                          |         |                          | 3.722   | -89.493213                |
|         |                          |         |                          |         |                          | 3.717   | -89.493356                |
|         |                          |         |                          |         |                          | 3.712   | -89.493500                |
|         |                          |         |                          |         |                          | 3.707   | -89.493645                |
|         |                          |         |                          |         |                          | 3.702   | -89.493790                |
|         |                          |         |                          |         |                          | 3.697   | -89.493937                |
|         |                          |         |                          |         |                          | 3.692   | -89.494085                |
|         |                          |         |                          |         |                          | 3.687   | -89.494234                |
|         |                          |         |                          |         |                          | 3.682   | -89.494384                |
|         |                          |         |                          |         |                          | 3.677   | -89.494535                |
|         |                          |         |                          |         |                          | 3.672   | -89.494687                |
|         |                          |         |                          |         |                          | 3.667   | -89.494840                |
|         |                          |         |                          |         |                          | 3.662   | -89.494994                |
|         |                          |         |                          |         |                          | 3.657   | -89.495148                |
|         |                          |         |                          |         |                          | 3.652   | -89.495304                |
|         |                          |         |                          |         |                          | 3.647   | -89.495460                |
|         |                          |         |                          |         |                          | 3.642   | -89.495617                |
|         |                          |         |                          |         |                          | 3.637   | -89.495775                |
|         |                          |         |                          |         |                          | 3.632   | -89.495933                |
|         |                          |         |                          |         |                          | 3.627   | -89.496092                |
|         |                          |         |                          |         |                          | 3.622   | -89.496252                |
|         |                          |         |                          |         |                          | 3.617   | -89.496412                |
|         |                          |         |                          |         |                          | 3.612   | -89.496573                |
|         |                          |         |                          |         |                          | 3.607   | -89.496735                |
|         |                          |         |                          |         |                          | 3.602   | -89.496897                |
|         |                          |         |                          |         |                          | 3.597   | -89.497059                |
|         |                          |         |                          |         |                          | 3.592   | -89.497222                |
|         |                          |         |                          |         |                          | 3.587   | -89.497386                |
|         |                          |         |                          |         |                          | 3.582   | -89.497549                |
|         |                          |         |                          |         |                          | 3.577   | -89.497714                |
|         |                          |         |                          |         |                          | 3.572   | -89.497879                |
|         |                          |         |                          |         |                          | 3.567   | -89.498044                |
|         |                          |         |                          |         |                          | 3.562   | -89.498210                |
|         |                          |         |                          |         |                          | 3.557   | -89.498377                |
|         |                          |         |                          |         |                          | 3.552   | -89.498544                |
|         |                          |         |                          |         |                          | 3.547   | -89.498711                |
|         |                          |         |                          |         |                          | 3.542   | -89.498880                |
|         |                          |         |                          |         |                          | 3.537   | -89.499048                |
|         |                          |         |                          |         |                          | 3.532   | -89.499217                |

Continued on next page

Table S1 – Continued from previous page

| $d$ (Å) | $E$ CASSCF<br>(Hartrees) | $d$ (Å) | $E$ CASPT2<br>(Hartrees) | $d$ (Å) | $E$ PNOF7s<br>(Hartrees) | $d$ (Å) | $E$ NOF-MP2<br>(Hartrees) |
|---------|--------------------------|---------|--------------------------|---------|--------------------------|---------|---------------------------|
|         |                          |         |                          |         |                          | 3.527   | -89.499387                |
|         |                          |         |                          |         |                          | 3.522   | -89.499558                |
|         |                          |         |                          |         |                          | 3.517   | -89.499728                |
|         |                          |         |                          |         |                          | 3.512   | -89.499900                |
|         |                          |         |                          |         |                          | 3.507   | -89.500072                |
|         |                          |         |                          |         |                          | 3.502   | -89.500245                |
|         |                          |         |                          |         |                          | 3.497   | -89.500418                |
|         |                          |         |                          |         |                          | 3.492   | -89.500592                |
|         |                          |         |                          |         |                          | 3.487   | -89.500766                |
|         |                          |         |                          |         |                          | 3.482   | -89.500942                |
|         |                          |         |                          |         |                          | 3.477   | -89.501117                |
|         |                          |         |                          |         |                          | 3.472   | -89.501294                |
|         |                          |         |                          |         |                          | 3.467   | -89.501471                |
|         |                          |         |                          |         |                          | 3.462   | -89.501649                |
|         |                          |         |                          |         |                          | 3.457   | -89.501828                |
|         |                          |         |                          |         |                          | 3.452   | -89.502008                |
|         |                          |         |                          |         |                          | 3.447   | -89.502188                |
|         |                          |         |                          |         |                          | 3.442   | -89.502369                |
|         |                          |         |                          |         |                          | 3.437   | -89.502551                |
|         |                          |         |                          |         |                          | 3.432   | -89.502734                |
|         |                          |         |                          |         |                          | 3.427   | -89.502918                |
|         |                          |         |                          |         |                          | 3.422   | -89.503102                |
|         |                          |         |                          |         |                          | 3.417   | -89.503288                |
|         |                          |         |                          |         |                          | 3.412   | -89.503474                |
|         |                          |         |                          |         |                          | 3.407   | -89.503662                |
|         |                          |         |                          |         |                          | 3.402   | -89.503850                |
|         |                          |         |                          |         |                          | 3.397   | -89.504039                |
|         |                          |         |                          |         |                          | 3.392   | -89.504230                |
|         |                          |         |                          |         |                          | 3.387   | -89.504421                |
|         |                          |         |                          |         |                          | 3.382   | -89.504613                |
|         |                          |         |                          |         |                          | 3.377   | -89.504806                |
|         |                          |         |                          |         |                          | 3.372   | -89.505000                |
|         |                          |         |                          |         |                          | 3.367   | -89.505194                |
|         |                          |         |                          |         |                          | 3.362   | -89.505389                |
|         |                          |         |                          |         |                          | 3.357   | -89.505585                |
|         |                          |         |                          |         |                          | 3.352   | -89.505781                |
|         |                          |         |                          |         |                          | 3.347   | -89.505978                |
|         |                          |         |                          |         |                          | 3.342   | -89.506175                |
|         |                          |         |                          |         |                          | 3.337   | -89.506372                |
|         |                          |         |                          |         |                          | 3.332   | -89.506570                |
|         |                          |         |                          |         |                          | 3.327   | -89.506768                |
|         |                          |         |                          |         |                          | 3.322   | -89.506966                |
|         |                          |         |                          |         |                          | 3.317   | -89.507164                |
|         |                          |         |                          |         |                          | 3.312   | -89.507362                |
|         |                          |         |                          |         |                          | 3.307   | -89.507560                |
|         |                          |         |                          |         |                          | 3.302   | -89.507759                |
|         |                          |         |                          |         |                          | 3.297   | -89.507957                |
|         |                          |         |                          |         |                          | 3.292   | -89.508155                |
|         |                          |         |                          |         |                          | 3.287   | -89.508352                |
|         |                          |         |                          |         |                          | 3.282   | -89.508550                |
|         |                          |         |                          |         |                          | 3.277   | -89.508748                |
|         |                          |         |                          |         |                          | 3.272   | -89.508946                |
|         |                          |         |                          |         |                          | 3.267   | -89.509144                |
|         |                          |         |                          |         |                          | 3.262   | -89.509342                |
|         |                          |         |                          |         |                          | 3.257   | -89.509541                |
|         |                          |         |                          |         |                          | 3.252   | -89.509740                |
|         |                          |         |                          |         |                          | 3.247   | -89.509939                |
|         |                          |         |                          |         |                          | 3.242   | -89.510138                |
|         |                          |         |                          |         |                          | 3.237   | -89.510338                |

Continued on next page

Table S1 – Continued from previous page

| $d$ (Å) | $E$ CASSCF<br>(Hartrees) | $d$ (Å) | $E$ CASPT2<br>(Hartrees) | $d$ (Å) | $E$ PNOF7s<br>(Hartrees) | $d$ (Å) | $E$ NOF-MP2<br>(Hartrees) |
|---------|--------------------------|---------|--------------------------|---------|--------------------------|---------|---------------------------|
|         |                          |         |                          |         |                          | 3.232   | -89.510538                |
|         |                          |         |                          |         |                          | 3.227   | -89.510739                |
|         |                          |         |                          |         |                          | 3.222   | -89.510941                |
|         |                          |         |                          |         |                          | 3.217   | -89.511143                |
|         |                          |         |                          |         |                          | 3.212   | -89.511345                |
|         |                          |         |                          |         |                          | 3.207   | -89.511549                |
|         |                          |         |                          |         |                          | 3.202   | -89.511753                |
|         |                          |         |                          |         |                          | 3.197   | -89.511958                |
|         |                          |         |                          |         |                          | 3.192   | -89.512164                |
|         |                          |         |                          |         |                          | 3.187   | -89.512370                |
|         |                          |         |                          |         |                          | 3.182   | -89.512578                |
|         |                          |         |                          |         |                          | 3.177   | -89.512786                |
|         |                          |         |                          |         |                          | 3.172   | -89.512996                |
|         |                          |         |                          |         |                          | 3.167   | -89.513206                |
|         |                          |         |                          |         |                          | 3.162   | -89.513417                |
|         |                          |         |                          |         |                          | 3.157   | -89.513630                |
|         |                          |         |                          |         |                          | 3.152   | -89.513843                |
|         |                          |         |                          |         |                          | 3.147   | -89.514058                |
|         |                          |         |                          |         |                          | 3.142   | -89.514273                |
|         |                          |         |                          |         |                          | 3.137   | -89.514490                |
|         |                          |         |                          |         |                          | 3.132   | -89.514708                |
|         |                          |         |                          |         |                          | 3.127   | -89.514927                |
|         |                          |         |                          |         |                          | 3.122   | -89.515147                |
|         |                          |         |                          |         |                          | 3.117   | -89.515368                |
|         |                          |         |                          |         |                          | 3.112   | -89.515590                |
|         |                          |         |                          |         |                          | 3.107   | -89.515814                |
|         |                          |         |                          |         |                          | 3.102   | -89.516039                |
|         |                          |         |                          |         |                          | 3.097   | -89.516265                |
|         |                          |         |                          |         |                          | 3.092   | -89.516493                |
|         |                          |         |                          |         |                          | 3.087   | -89.516722                |
|         |                          |         |                          |         |                          | 3.082   | -89.516952                |
|         |                          |         |                          |         |                          | 3.077   | -89.517184                |
|         |                          |         |                          |         |                          | 3.072   | -89.517418                |
|         |                          |         |                          |         |                          | 3.067   | -89.517653                |
|         |                          |         |                          |         |                          | 3.062   | -89.517889                |
|         |                          |         |                          |         |                          | 3.057   | -89.518128                |
|         |                          |         |                          |         |                          | 3.052   | -89.518367                |
|         |                          |         |                          |         |                          | 3.047   | -89.518609                |
|         |                          |         |                          |         |                          | 3.042   | -89.518853                |
|         |                          |         |                          |         |                          | 3.037   | -89.519098                |
|         |                          |         |                          |         |                          | 3.032   | -89.519345                |
|         |                          |         |                          |         |                          | 3.027   | -89.519594                |
|         |                          |         |                          |         |                          | 3.022   | -89.519845                |
|         |                          |         |                          |         |                          | 3.017   | -89.520098                |
|         |                          |         |                          |         |                          | 3.012   | -89.520354                |
|         |                          |         |                          |         |                          | 3.007   | -89.520611                |
|         |                          |         |                          |         |                          | 3.002   | -89.520870                |
|         |                          |         |                          |         |                          | 2.996   | -89.521132                |
|         |                          |         |                          |         |                          | 2.991   | -89.521396                |
|         |                          |         |                          |         |                          | 2.986   | -89.521662                |
|         |                          |         |                          |         |                          | 2.981   | -89.521930                |
|         |                          |         |                          |         |                          | 2.976   | -89.522200                |
|         |                          |         |                          |         |                          | 2.971   | -89.522472                |
|         |                          |         |                          |         |                          | 2.966   | -89.522746                |
|         |                          |         |                          |         |                          | 2.961   | -89.523021                |
|         |                          |         |                          |         |                          | 2.956   | -89.523298                |
|         |                          |         |                          |         |                          | 2.951   | -89.523577                |
|         |                          |         |                          |         |                          | 2.946   | -89.523857                |
|         |                          |         |                          |         |                          | 2.941   | -89.524138                |

Continued on next page



Table S1 – Continued from previous page

| $d$ (Å) | $E$ CASSCF<br>(Hartrees) | $d$ (Å) | $E$ CASPT2<br>(Hartrees) | $d$ (Å) | $E$ PNOF7s<br>(Hartrees) | $d$ (Å) | $E$ NOF-MP2<br>(Hartrees) |
|---------|--------------------------|---------|--------------------------|---------|--------------------------|---------|---------------------------|
|         |                          |         |                          |         |                          | 2.936   | -89.524421                |
|         |                          |         |                          |         |                          | 2.931   | -89.524705                |
|         |                          |         |                          |         |                          | 2.926   | -89.524990                |
|         |                          |         |                          |         |                          | 2.921   | -89.525276                |
|         |                          |         |                          |         |                          | 2.916   | -89.525564                |
|         |                          |         |                          |         |                          | 2.911   | -89.525852                |
|         |                          |         |                          |         |                          | 2.906   | -89.526141                |
|         |                          |         |                          |         |                          | 2.901   | -89.526431                |
|         |                          |         |                          |         |                          | 2.896   | -89.526722                |
|         |                          |         |                          |         |                          | 2.891   | -89.527013                |
|         |                          |         |                          |         |                          | 2.886   | -89.527305                |
|         |                          |         |                          |         |                          | 2.881   | -89.527599                |
|         |                          |         |                          |         |                          | 2.876   | -89.527893                |
|         |                          |         |                          |         |                          | 2.871   | -89.528189                |
|         |                          |         |                          |         |                          | 2.866   | -89.528486                |
|         |                          |         |                          |         |                          | 2.861   | -89.528785                |
|         |                          |         |                          |         |                          | 2.856   | -89.529086                |
|         |                          |         |                          |         |                          | 2.851   | -89.529389                |
|         |                          |         |                          |         |                          | 2.846   | -89.529693                |
|         |                          |         |                          |         |                          | 2.841   | -89.530000                |
|         |                          |         |                          |         |                          | 2.836   | -89.530309                |
|         |                          |         |                          |         |                          | 2.831   | -89.530621                |
|         |                          |         |                          |         |                          | 2.826   | -89.530935                |
|         |                          |         |                          |         |                          | 2.821   | -89.531252                |
|         |                          |         |                          |         |                          | 2.816   | -89.531571                |
|         |                          |         |                          |         |                          | 2.811   | -89.531894                |
|         |                          |         |                          |         |                          | 2.806   | -89.532220                |
|         |                          |         |                          |         |                          | 2.801   | -89.532549                |
|         |                          |         |                          |         |                          | 2.796   | -89.532882                |
|         |                          |         |                          |         |                          | 2.791   | -89.533218                |
|         |                          |         |                          |         |                          | 2.786   | -89.533558                |
|         |                          |         |                          |         |                          | 2.781   | -89.533901                |
|         |                          |         |                          |         |                          | 2.776   | -89.534248                |
|         |                          |         |                          |         |                          | 2.771   | -89.534598                |
|         |                          |         |                          |         |                          | 2.766   | -89.534951                |
|         |                          |         |                          |         |                          | 2.761   | -89.535308                |
|         |                          |         |                          |         |                          | 2.756   | -89.535669                |
|         |                          |         |                          |         |                          | 2.751   | -89.536032                |
|         |                          |         |                          |         |                          | 2.746   | -89.536399                |
|         |                          |         |                          |         |                          | 2.741   | -89.536770                |
|         |                          |         |                          |         |                          | 2.736   | -89.537143                |
|         |                          |         |                          |         |                          | 2.731   | -89.537520                |
|         |                          |         |                          |         |                          | 2.726   | -89.537901                |
|         |                          |         |                          |         |                          | 2.721   | -89.538285                |
|         |                          |         |                          |         |                          | 2.716   | -89.538672                |
|         |                          |         |                          |         |                          | 2.711   | -89.539062                |
|         |                          |         |                          |         |                          | 2.706   | -89.539455                |
|         |                          |         |                          |         |                          | 2.701   | -89.539852                |
|         |                          |         |                          |         |                          | 2.696   | -89.540252                |
|         |                          |         |                          |         |                          | 2.691   | -89.540656                |
|         |                          |         |                          |         |                          | 2.686   | -89.541062                |
|         |                          |         |                          |         |                          | 2.681   | -89.541472                |
|         |                          |         |                          |         |                          | 2.676   | -89.541885                |
|         |                          |         |                          |         |                          | 2.671   | -89.542302                |
|         |                          |         |                          |         |                          | 2.666   | -89.542722                |
|         |                          |         |                          |         |                          | 2.661   | -89.543146                |
|         |                          |         |                          |         |                          | 2.656   | -89.543573                |
|         |                          |         |                          |         |                          | 2.651   | -89.544003                |
|         |                          |         |                          |         |                          | 2.646   | -89.544437                |

Continued on next page

Table S1 – Continued from previous page

| $d$ (Å) | $E$ CASSCF<br>(Hartrees) | $d$ (Å) | $E$ CASPT2<br>(Hartrees) | $d$ (Å) | $E$ PNOF7s<br>(Hartrees) | $d$ (Å) | $E$ NOF-MP2<br>(Hartrees) |
|---------|--------------------------|---------|--------------------------|---------|--------------------------|---------|---------------------------|
|         |                          |         |                          |         |                          | 2.641   | -89.544875                |
|         |                          |         |                          |         |                          | 2.636   | -89.545316                |
|         |                          |         |                          |         |                          | 2.631   | -89.545761                |
|         |                          |         |                          |         |                          | 2.626   | -89.546209                |
|         |                          |         |                          |         |                          | 2.621   | -89.546662                |
|         |                          |         |                          |         |                          | 2.616   | -89.547118                |
|         |                          |         |                          |         |                          | 2.611   | -89.547577                |
|         |                          |         |                          |         |                          | 2.606   | -89.548041                |
|         |                          |         |                          |         |                          | 2.601   | -89.548508                |
|         |                          |         |                          |         |                          | 2.596   | -89.548979                |
|         |                          |         |                          |         |                          | 2.591   | -89.549454                |
|         |                          |         |                          |         |                          | 2.586   | -89.549933                |
|         |                          |         |                          |         |                          | 2.581   | -89.550416                |
|         |                          |         |                          |         |                          | 2.576   | -89.550903                |
|         |                          |         |                          |         |                          | 2.571   | -89.551393                |
|         |                          |         |                          |         |                          | 2.566   | -89.551887                |
|         |                          |         |                          |         |                          | 2.561   | -89.552385                |
|         |                          |         |                          |         |                          | 2.556   | -89.552886                |
|         |                          |         |                          |         |                          | 2.551   | -89.553391                |
|         |                          |         |                          |         |                          | 2.546   | -89.553900                |
|         |                          |         |                          |         |                          | 2.541   | -89.554413                |
|         |                          |         |                          |         |                          | 2.536   | -89.554929                |
|         |                          |         |                          |         |                          | 2.531   | -89.555449                |
|         |                          |         |                          |         |                          | 2.526   | -89.555973                |
|         |                          |         |                          |         |                          | 2.521   | -89.556500                |
|         |                          |         |                          |         |                          | 2.516   | -89.557031                |
|         |                          |         |                          |         |                          | 2.511   | -89.557565                |
|         |                          |         |                          |         |                          | 2.506   | -89.558103                |
|         |                          |         |                          |         |                          | 2.501   | -89.558644                |
|         |                          |         |                          |         |                          | 2.496   | -89.559189                |
|         |                          |         |                          |         |                          | 2.491   | -89.559737                |
|         |                          |         |                          |         |                          | 2.486   | -89.560289                |
|         |                          |         |                          |         |                          | 2.481   | -89.560845                |
|         |                          |         |                          |         |                          | 2.476   | -89.561404                |
|         |                          |         |                          |         |                          | 2.471   | -89.561966                |
|         |                          |         |                          |         |                          | 2.466   | -89.562532                |
|         |                          |         |                          |         |                          | 2.461   | -89.563101                |
|         |                          |         |                          |         |                          | 2.456   | -89.563674                |
|         |                          |         |                          |         |                          | 2.451   | -89.564250                |
|         |                          |         |                          |         |                          | 2.446   | -89.564830                |
|         |                          |         |                          |         |                          | 2.441   | -89.565413                |
|         |                          |         |                          |         |                          | 2.436   | -89.566000                |
|         |                          |         |                          |         |                          | 2.431   | -89.566590                |
|         |                          |         |                          |         |                          | 2.426   | -89.567184                |
|         |                          |         |                          |         |                          | 2.421   | -89.567781                |
|         |                          |         |                          |         |                          | 2.416   | -89.568381                |
|         |                          |         |                          |         |                          | 2.411   | -89.568985                |
|         |                          |         |                          |         |                          | 2.406   | -89.569592                |
|         |                          |         |                          |         |                          | 2.401   | -89.570203                |
|         |                          |         |                          |         |                          | 2.396   | -89.570818                |
|         |                          |         |                          |         |                          | 2.391   | -89.571435                |
|         |                          |         |                          |         |                          | 2.386   | -89.572056                |
|         |                          |         |                          |         |                          | 2.381   | -89.572681                |
|         |                          |         |                          |         |                          | 2.376   | -89.573309                |
|         |                          |         |                          |         |                          | 2.371   | -89.573940                |
|         |                          |         |                          |         |                          | 2.366   | -89.574574                |
|         |                          |         |                          |         |                          | 2.361   | -89.575211                |
|         |                          |         |                          |         |                          | 2.356   | -89.575852                |
|         |                          |         |                          |         |                          | 2.351   | -89.576496                |

Continued on next page

Table S1 – Continued from previous page

| $d$ (Å) | $E$ CASSCF<br>(Hartrees) | $d$ (Å) | $E$ CASPT2<br>(Hartrees) | $d$ (Å) | $E$ PNOF7s<br>(Hartrees) | $d$ (Å) | $E$ NOF-MP2<br>(Hartrees) |
|---------|--------------------------|---------|--------------------------|---------|--------------------------|---------|---------------------------|
|         |                          |         |                          |         |                          | 2.346   | -89.577143                |
|         |                          |         |                          |         |                          | 2.341   | -89.577794                |
|         |                          |         |                          |         |                          | 2.336   | -89.578447                |
|         |                          |         |                          |         |                          | 2.331   | -89.579103                |
|         |                          |         |                          |         |                          | 2.326   | -89.579763                |
|         |                          |         |                          |         |                          | 2.321   | -89.580425                |
|         |                          |         |                          |         |                          | 2.316   | -89.581091                |
|         |                          |         |                          |         |                          | 2.311   | -89.581759                |
|         |                          |         |                          |         |                          | 2.306   | -89.582431                |
|         |                          |         |                          |         |                          | 2.301   | -89.583105                |
|         |                          |         |                          |         |                          | 2.296   | -89.583782                |
|         |                          |         |                          |         |                          | 2.291   | -89.584462                |
|         |                          |         |                          |         |                          | 2.286   | -89.585145                |
|         |                          |         |                          |         |                          | 2.281   | -89.585830                |
|         |                          |         |                          |         |                          | 2.276   | -89.586519                |
|         |                          |         |                          |         |                          | 2.271   | -89.587210                |
|         |                          |         |                          |         |                          | 2.266   | -89.587903                |
|         |                          |         |                          |         |                          | 2.261   | -89.588600                |
|         |                          |         |                          |         |                          | 2.256   | -89.589298                |
|         |                          |         |                          |         |                          | 2.251   | -89.590000                |
|         |                          |         |                          |         |                          | 2.246   | -89.590704                |
|         |                          |         |                          |         |                          | 2.241   | -89.591410                |
|         |                          |         |                          |         |                          | 2.236   | -89.592119                |
|         |                          |         |                          |         |                          | 2.231   | -89.592830                |
|         |                          |         |                          |         |                          | 2.226   | -89.593543                |
|         |                          |         |                          |         |                          | 2.221   | -89.594259                |
|         |                          |         |                          |         |                          | 2.216   | -89.594977                |
|         |                          |         |                          |         |                          | 2.211   | -89.595697                |
|         |                          |         |                          |         |                          | 2.206   | -89.596419                |
|         |                          |         |                          |         |                          | 2.201   | -89.597144                |
|         |                          |         |                          |         |                          | 2.196   | -89.597871                |
|         |                          |         |                          |         |                          | 2.191   | -89.598599                |
|         |                          |         |                          |         |                          | 2.186   | -89.599330                |
|         |                          |         |                          |         |                          | 2.181   | -89.600063                |
|         |                          |         |                          |         |                          | 2.176   | -89.600798                |
|         |                          |         |                          |         |                          | 2.171   | -89.601535                |
|         |                          |         |                          |         |                          | 2.166   | -89.602274                |
|         |                          |         |                          |         |                          | 2.161   | -89.603015                |
|         |                          |         |                          |         |                          | 2.156   | -89.603758                |
|         |                          |         |                          |         |                          | 2.151   | -89.604503                |
|         |                          |         |                          |         |                          | 2.146   | -89.605250                |
|         |                          |         |                          |         |                          | 2.141   | -89.605999                |
|         |                          |         |                          |         |                          | 2.136   | -89.606750                |
|         |                          |         |                          |         |                          | 2.131   | -89.607502                |
|         |                          |         |                          |         |                          | 2.126   | -89.608257                |
|         |                          |         |                          |         |                          | 2.121   | -89.609014                |
|         |                          |         |                          |         |                          | 2.116   | -89.609772                |
|         |                          |         |                          |         |                          | 2.111   | -89.610532                |
|         |                          |         |                          |         |                          | 2.106   | -89.611294                |
|         |                          |         |                          |         |                          | 2.101   | -89.612058                |
|         |                          |         |                          |         |                          | 2.096   | -89.612824                |
|         |                          |         |                          |         |                          | 2.091   | -89.613591                |
|         |                          |         |                          |         |                          | 2.086   | -89.614360                |
|         |                          |         |                          |         |                          | 2.081   | -89.615131                |
|         |                          |         |                          |         |                          | 2.076   | -89.615903                |
|         |                          |         |                          |         |                          | 2.071   | -89.616677                |
|         |                          |         |                          |         |                          | 2.066   | -89.617452                |
|         |                          |         |                          |         |                          | 2.061   | -89.618228                |
|         |                          |         |                          |         |                          | 2.056   | -89.619005                |

Continued on next page

Table S1 – Continued from previous page

| $d$ (Å) | $E$ CASSCF<br>(Hartrees) | $d$ (Å) | $E$ CASPT2<br>(Hartrees) | $d$ (Å) | $E$ PNOF7s<br>(Hartrees) | $d$ (Å) | $E$ NOF-MP2<br>(Hartrees) |
|---------|--------------------------|---------|--------------------------|---------|--------------------------|---------|---------------------------|
|         |                          |         |                          |         |                          | 2.051   | -89.619783                |
|         |                          |         |                          |         |                          | 2.046   | -89.620563                |
|         |                          |         |                          |         |                          | 2.041   | -89.621343                |
|         |                          |         |                          |         |                          | 2.036   | -89.622124                |
|         |                          |         |                          |         |                          | 2.031   | -89.622905                |
|         |                          |         |                          |         |                          | 2.026   | -89.623688                |
|         |                          |         |                          |         |                          | 2.021   | -89.624470                |
|         |                          |         |                          |         |                          | 2.016   | -89.625254                |
|         |                          |         |                          |         |                          | 2.011   | -89.626037                |
|         |                          |         |                          |         |                          | 2.006   | -89.626821                |
|         |                          |         |                          |         |                          | 2.001   | -89.627605                |
|         |                          |         |                          |         |                          | 1.995   | -89.628390                |
|         |                          |         |                          |         |                          | 1.990   | -89.629174                |
|         |                          |         |                          |         |                          | 1.985   | -89.629959                |
|         |                          |         |                          |         |                          | 1.980   | -89.630744                |
|         |                          |         |                          |         |                          | 1.975   | -89.631530                |
|         |                          |         |                          |         |                          | 1.970   | -89.632316                |
|         |                          |         |                          |         |                          | 1.965   | -89.633103                |
|         |                          |         |                          |         |                          | 1.960   | -89.633891                |
|         |                          |         |                          |         |                          | 1.955   | -89.634680                |
|         |                          |         |                          |         |                          | 1.950   | -89.635470                |
|         |                          |         |                          |         |                          | 1.945   | -89.636262                |
|         |                          |         |                          |         |                          | 1.940   | -89.637054                |
|         |                          |         |                          |         |                          | 1.935   | -89.637848                |
|         |                          |         |                          |         |                          | 1.930   | -89.638644                |
|         |                          |         |                          |         |                          | 1.925   | -89.639441                |
|         |                          |         |                          |         |                          | 1.920   | -89.640240                |
|         |                          |         |                          |         |                          | 1.915   | -89.641041                |
|         |                          |         |                          |         |                          | 1.910   | -89.641844                |
|         |                          |         |                          |         |                          | 1.905   | -89.642649                |
|         |                          |         |                          |         |                          | 1.900   | -89.643457                |
|         |                          |         |                          |         |                          | 1.895   | -89.644266                |
|         |                          |         |                          |         |                          | 1.890   | -89.645078                |
|         |                          |         |                          |         |                          | 1.885   | -89.645890                |
|         |                          |         |                          |         |                          | 1.880   | -89.646703                |
|         |                          |         |                          |         |                          | 1.875   | -89.647514                |
|         |                          |         |                          |         |                          | 1.870   | -89.648325                |
|         |                          |         |                          |         |                          | 1.865   | -89.649133                |
|         |                          |         |                          |         |                          | 1.860   | -89.649939                |
|         |                          |         |                          |         |                          | 1.855   | -89.650740                |
|         |                          |         |                          |         |                          | 1.850   | -89.651537                |
|         |                          |         |                          |         |                          | 1.845   | -89.652329                |
|         |                          |         |                          |         |                          | 1.840   | -89.653114                |
|         |                          |         |                          |         |                          | 1.835   | -89.653893                |
|         |                          |         |                          |         |                          | 1.830   | -89.654664                |
|         |                          |         |                          |         |                          | 1.825   | -89.655427                |
|         |                          |         |                          |         |                          | 1.820   | -89.656180                |
|         |                          |         |                          |         |                          | 1.815   | -89.656923                |
|         |                          |         |                          |         |                          | 1.810   | -89.657656                |
|         |                          |         |                          |         |                          | 1.805   | -89.658376                |
|         |                          |         |                          |         |                          | 1.800   | -89.659085                |
|         |                          |         |                          |         |                          | 1.795   | -89.659780                |
|         |                          |         |                          |         |                          | 1.790   | -89.660465                |
|         |                          |         |                          |         |                          | 1.785   | -89.661140                |
|         |                          |         |                          |         |                          | 1.780   | -89.661808                |
|         |                          |         |                          |         |                          | 1.775   | -89.662471                |
|         |                          |         |                          |         |                          | 1.770   | -89.663132                |
|         |                          |         |                          |         |                          | 1.765   | -89.663794                |
|         |                          |         |                          |         |                          | 1.760   | -89.664457                |

Continued on next page

Table S1 – Continued from previous page

| $d$ (Å) | $E$ CASSCF<br>(Hartrees) | $d$ (Å) | $E$ CASPT2<br>(Hartrees) | $d$ (Å) | $E$ PNOF7s<br>(Hartrees) | $d$ (Å) | $E$ NOF-MP2<br>(Hartrees) |
|---------|--------------------------|---------|--------------------------|---------|--------------------------|---------|---------------------------|
|         |                          |         |                          |         |                          | 1.755   | -89.665124                |
|         |                          |         |                          |         |                          | 1.750   | -89.665799                |
|         |                          |         |                          |         |                          | 1.745   | -89.666482                |
|         |                          |         |                          |         |                          | 1.740   | -89.667176                |
|         |                          |         |                          |         |                          | 1.735   | -89.667884                |
|         |                          |         |                          |         |                          | 1.730   | -89.668608                |
|         |                          |         |                          |         |                          | 1.725   | -89.669349                |
|         |                          |         |                          |         |                          | 1.720   | -89.670111                |
|         |                          |         |                          |         |                          | 1.715   | -89.670895                |
|         |                          |         |                          |         |                          | 1.710   | -89.671704                |
|         |                          |         |                          |         |                          | 1.705   | -89.672540                |
|         |                          |         |                          |         |                          | 1.700   | -89.673405                |
|         |                          |         |                          |         |                          | 1.695   | -89.674301                |
|         |                          |         |                          |         |                          | 1.690   | -89.675228                |
|         |                          |         |                          |         |                          | 1.685   | -89.676185                |
|         |                          |         |                          |         |                          | 1.680   | -89.677169                |
|         |                          |         |                          |         |                          | 1.675   | -89.678181                |
|         |                          |         |                          |         |                          | 1.670   | -89.679218                |
|         |                          |         |                          |         |                          | 1.665   | -89.680279                |
|         |                          |         |                          |         |                          | 1.660   | -89.681364                |
|         |                          |         |                          |         |                          | 1.655   | -89.682470                |
|         |                          |         |                          |         |                          | 1.650   | -89.683596                |
|         |                          |         |                          |         |                          | 1.645   | -89.684742                |
|         |                          |         |                          |         |                          | 1.640   | -89.685905                |
|         |                          |         |                          |         |                          | 1.635   | -89.687085                |
|         |                          |         |                          |         |                          | 1.630   | -89.688280                |
|         |                          |         |                          |         |                          | 1.625   | -89.689489                |
|         |                          |         |                          |         |                          | 1.620   | -89.690711                |
|         |                          |         |                          |         |                          | 1.615   | -89.691945                |
|         |                          |         |                          |         |                          | 1.610   | -89.693188                |
|         |                          |         |                          |         |                          | 1.605   | -89.694440                |
|         |                          |         |                          |         |                          | 1.600   | -89.695700                |
|         |                          |         |                          |         |                          | 1.595   | -89.696966                |
|         |                          |         |                          |         |                          | 1.590   | -89.698237                |
|         |                          |         |                          |         |                          | 1.585   | -89.699512                |
|         |                          |         |                          |         |                          | 1.580   | -89.700789                |
|         |                          |         |                          |         |                          | 1.575   | -89.702067                |
|         |                          |         |                          |         |                          | 1.570   | -89.703345                |
|         |                          |         |                          |         |                          | 1.565   | -89.704621                |
|         |                          |         |                          |         |                          | 1.560   | -89.705895                |
|         |                          |         |                          |         |                          | 1.555   | -89.707164                |
|         |                          |         |                          |         |                          | 1.550   | -89.708429                |
|         |                          |         |                          |         |                          | 1.545   | -89.709686                |
|         |                          |         |                          |         |                          | 1.540   | -89.710936                |
|         |                          |         |                          |         |                          | 1.535   | -89.712176                |
|         |                          |         |                          |         |                          | 1.530   | -89.713406                |
|         |                          |         |                          |         |                          | 1.525   | -89.714625                |
|         |                          |         |                          |         |                          | 1.520   | -89.715830                |
|         |                          |         |                          |         |                          | 1.515   | -89.717021                |
|         |                          |         |                          |         |                          | 1.510   | -89.718196                |
|         |                          |         |                          |         |                          | 1.505   | -89.719354                |
|         |                          |         |                          |         |                          | 1.500   | -89.720494                |
|         |                          |         |                          |         |                          | 1.495   | -89.721614                |
|         |                          |         |                          |         |                          | 1.490   | -89.722714                |
|         |                          |         |                          |         |                          | 1.485   | -89.723792                |
|         |                          |         |                          |         |                          | 1.480   | -89.724846                |
|         |                          |         |                          |         |                          | 1.475   | -89.725875                |
|         |                          |         |                          |         |                          | 1.470   | -89.726879                |
|         |                          |         |                          |         |                          | 1.465   | -89.727855                |

Continued on next page

Table S1 – Continued from previous page

| $d$ (Å) | $E$ CASSCF<br>(Hartrees) | $d$ (Å) | $E$ CASPT2<br>(Hartrees) | $d$ (Å) | $E$ PNOF7s<br>(Hartrees) | $d$ (Å) | $E$ NOF-MP2<br>(Hartrees) |
|---------|--------------------------|---------|--------------------------|---------|--------------------------|---------|---------------------------|
|         |                          |         |                          |         |                          | 1.460   | -89.728803                |
|         |                          |         |                          |         |                          | 1.455   | -89.729721                |
|         |                          |         |                          |         |                          | 1.450   | -89.730608                |
|         |                          |         |                          |         |                          | 1.445   | -89.731463                |
|         |                          |         |                          |         |                          | 1.440   | -89.732283                |
|         |                          |         |                          |         |                          | 1.435   | -89.733069                |
|         |                          |         |                          |         |                          | 1.430   | -89.733819                |
|         |                          |         |                          |         |                          | 1.425   | -89.734531                |
|         |                          |         |                          |         |                          | 1.420   | -89.735204                |
|         |                          |         |                          |         |                          | 1.415   | -89.735837                |
|         |                          |         |                          |         |                          | 1.410   | -89.736429                |
|         |                          |         |                          |         |                          | 1.405   | -89.736978                |
|         |                          |         |                          |         |                          | 1.400   | -89.737483                |
|         |                          |         |                          |         |                          | 1.395   | -89.737942                |
|         |                          |         |                          |         |                          | 1.390   | -89.738356                |
|         |                          |         |                          |         |                          | 1.385   | -89.738721                |
|         |                          |         |                          |         |                          | 1.380   | -89.739037                |
|         |                          |         |                          |         |                          | 1.375   | -89.739304                |
|         |                          |         |                          |         |                          | 1.370   | -89.739528                |
|         |                          |         |                          |         |                          | 1.365   | -89.739715                |
|         |                          |         |                          |         |                          | 1.360   | -89.739865                |
|         |                          |         |                          |         |                          | 1.355   | -89.739977                |
|         |                          |         |                          |         |                          | 1.350   | -89.740048                |
|         |                          |         |                          |         |                          | 1.345   | -89.740079                |
|         |                          |         |                          |         |                          | 1.340   | -89.740068                |
|         |                          |         |                          |         |                          | 1.335   | -89.740014                |
|         |                          |         |                          |         |                          | 1.330   | -89.739916                |
|         |                          |         |                          |         |                          | 1.325   | -89.739773                |
|         |                          |         |                          |         |                          | 1.320   | -89.739582                |
|         |                          |         |                          |         |                          | 1.315   | -89.739343                |
|         |                          |         |                          |         |                          | 1.310   | -89.739055                |
|         |                          |         |                          |         |                          | 1.305   | -89.738715                |
|         |                          |         |                          |         |                          | 1.300   | -89.738323                |
|         |                          |         |                          |         |                          | 1.295   | -89.737877                |
|         |                          |         |                          |         |                          | 1.290   | -89.737376                |
|         |                          |         |                          |         |                          | 1.285   | -89.736817                |
|         |                          |         |                          |         |                          | 1.280   | -89.736199                |
|         |                          |         |                          |         |                          | 1.275   | -89.735520                |
|         |                          |         |                          |         |                          | 1.270   | -89.734778                |
|         |                          |         |                          |         |                          | 1.265   | -89.733972                |
|         |                          |         |                          |         |                          | 1.260   | -89.733099                |
|         |                          |         |                          |         |                          | 1.255   | -89.732159                |
|         |                          |         |                          |         |                          | 1.250   | -89.731148                |
|         |                          |         |                          |         |                          | 1.245   | -89.730065                |
|         |                          |         |                          |         |                          | 1.240   | -89.728908                |
|         |                          |         |                          |         |                          | 1.235   | -89.727676                |
|         |                          |         |                          |         |                          | 1.230   | -89.726367                |
|         |                          |         |                          |         |                          | 1.225   | -89.724978                |
|         |                          |         |                          |         |                          | 1.220   | -89.723508                |
|         |                          |         |                          |         |                          | 1.215   | -89.721956                |
|         |                          |         |                          |         |                          | 1.210   | -89.720319                |
|         |                          |         |                          |         |                          | 1.205   | -89.718596                |
|         |                          |         |                          |         |                          | 1.200   | -89.716784                |
|         |                          |         |                          |         |                          | 1.195   | -89.714882                |
|         |                          |         |                          |         |                          | 1.190   | -89.712886                |
|         |                          |         |                          |         |                          | 1.185   | -89.710793                |
|         |                          |         |                          |         |                          | 1.180   | -89.708598                |
|         |                          |         |                          |         |                          | 1.175   | -89.706298                |
|         |                          |         |                          |         |                          | 1.170   | -89.703889                |

Continued on next page

Table S1 – Continued from previous page

| $d$ (Å) | $E$ CASSCF<br>(Hartrees) | $d$ (Å) | $E$ CASPT2<br>(Hartrees) | $d$ (Å) | $E$ PNOF7s<br>(Hartrees) | $d$ (Å) | $E$ NOF-MP2<br>(Hartrees) |
|---------|--------------------------|---------|--------------------------|---------|--------------------------|---------|---------------------------|
|         |                          |         |                          |         |                          | 1.165   | -89.701368                |
|         |                          |         |                          |         |                          | 1.160   | -89.698729                |
|         |                          |         |                          |         |                          | 1.155   | -89.695971                |
|         |                          |         |                          |         |                          | 1.150   | -89.693088                |
|         |                          |         |                          |         |                          | 1.145   | -89.690078                |
|         |                          |         |                          |         |                          | 1.140   | -89.686935                |
|         |                          |         |                          |         |                          | 1.135   | -89.683657                |
|         |                          |         |                          |         |                          | 1.130   | -89.680240                |
|         |                          |         |                          |         |                          | 1.125   | -89.676680                |
|         |                          |         |                          |         |                          | 1.120   | -89.672973                |
|         |                          |         |                          |         |                          | 1.115   | -89.669115                |
|         |                          |         |                          |         |                          | 1.110   | -89.665102                |
|         |                          |         |                          |         |                          | 1.105   | -89.660932                |
|         |                          |         |                          |         |                          | 1.100   | -89.656599                |
|         |                          |         |                          |         |                          | 1.095   | -89.652101                |
|         |                          |         |                          |         |                          | 1.090   | -89.647433                |
|         |                          |         |                          |         |                          | 1.085   | -89.642592                |
|         |                          |         |                          |         |                          | 1.080   | -89.637576                |
|         |                          |         |                          |         |                          | 1.075   | -89.632380                |
|         |                          |         |                          |         |                          | 1.070   | -89.627001                |
|         |                          |         |                          |         |                          | 1.065   | -89.621436                |
|         |                          |         |                          |         |                          | 1.060   | -89.615681                |
|         |                          |         |                          |         |                          | 1.055   | -89.609733                |
|         |                          |         |                          |         |                          | 1.050   | -89.603589                |
|         |                          |         |                          |         |                          | 1.045   | -89.597244                |
|         |                          |         |                          |         |                          | 1.040   | -89.590697                |
|         |                          |         |                          |         |                          | 1.035   | -89.583943                |
|         |                          |         |                          |         |                          | 1.030   | -89.576979                |
|         |                          |         |                          |         |                          | 1.025   | -89.569801                |
|         |                          |         |                          |         |                          | 1.020   | -89.562407                |
|         |                          |         |                          |         |                          | 1.015   | -89.554792                |
|         |                          |         |                          |         |                          | 1.010   | -89.546953                |
|         |                          |         |                          |         |                          | 1.005   | -89.538888                |
|         |                          |         |                          |         |                          | 1.000   | -89.530592                |

Table S2 Potential energy surface of CS

| $d$ (Å) | $E$ CASSCF<br>(Hartrees) | $d$ (Å) | $E$ CASPT2<br>(Hartrees) | $d$ (Å) | $E$ PNOF7s<br>(Hartrees) | $d$ (Å) | $E$ NOF-MP2<br>(Hartrees) |
|---------|--------------------------|---------|--------------------------|---------|--------------------------|---------|---------------------------|
| 5.000   | -435.220344              | 5.000   | -435.411551              | 5.000   | -435.255640              | 5.000   | -435.437617               |
| 4.900   | -435.220376              | 4.900   | -435.411626              | 4.900   | -435.255652              | 4.900   | -435.437841               |
| 4.800   | -435.220411              | 4.800   | -435.411691              | 4.800   | -435.255667              | 4.800   | -435.438125               |
| 4.700   | -435.220451              | 4.700   | -435.411758              | 4.700   | -435.255685              | 4.700   | -435.438451               |
| 4.600   | -435.220495              | 4.600   | -435.411836              | 4.600   | -435.255706              | 4.600   | -435.438826               |
| 4.500   | -435.220544              | 4.500   | -435.411918              | 4.500   | -435.255733              | 4.500   | -435.439263               |
| 4.400   | -435.220598              | 4.400   | -435.412025              | 4.400   | -435.255766              | 4.400   | -435.439766               |
| 4.300   | -435.220659              | 4.300   | -435.412133              | 4.300   | -435.255808              | 4.300   | -435.440347               |
| 4.200   | -435.220729              | 4.200   | -435.412291              | 4.200   | -435.255862              | 4.200   | -435.441007               |
| 4.100   | -435.220807              | 4.100   | -435.412444              | 4.100   | -435.255930              | 4.100   | -435.441755               |
| 4.000   | -435.220897              | 4.000   | -435.412636              | 4.000   | -435.256018              | 4.000   | -435.442602               |
| 3.900   | -435.221001              | 3.900   | -435.412878              | 3.900   | -435.256131              | 3.900   | -435.443549               |
| 3.800   | -435.221123              | 3.800   | -435.413182              | 3.800   | -435.256275              | 3.800   | -435.444613               |
| 3.700   | -435.221267              | 3.700   | -435.413575              | 3.700   | -435.256459              | 3.700   | -435.445799               |
| 3.600   | -435.221445              | 3.600   | -435.414102              | 3.600   | -435.256696              | 3.600   | -435.447116               |
| 3.500   | -435.221678              | 3.500   | -435.414859              | 3.500   | -435.256999              | 3.500   | -435.448577               |
| 3.400   | -435.222017              | 3.400   | -435.416179              | 3.400   | -435.257390              | 3.400   | -435.450198               |
| 3.300   | -435.222750              | 3.300   | -435.422355              | 3.300   | -435.257895              | 3.300   | -435.451986               |
| 3.200   | -435.224562              | 3.200   | -435.429290              | 3.200   | -435.258548              | 3.200   | -435.453948               |

Continued on next page

Table S2 – Continued from previous page

| $d$ (Å) | $E$ CASSCF<br>(Hartrees) | $d$ (Å) | $E$ CASPT2<br>(Hartrees) | $d$ (Å) | $E$ PNOF7s<br>(Hartrees) | $d$ (Å) | $E$ NOF-MP2<br>(Hartrees) |
|---------|--------------------------|---------|--------------------------|---------|--------------------------|---------|---------------------------|
| 3.100   | -435.227321              | 3.100   | -435.434185              | 3.100   | -435.259392              | 3.100   | -435.456079               |
| 3.000   | -435.231099              | 3.000   | -435.439205              | 3.000   | -435.260483              | 3.000   | -435.458353               |
| 2.900   | -435.236116              | 2.900   | -435.445054              | 2.900   | -435.261890              | 2.900   | -435.460711               |
| 2.800   | -435.242656              | 2.800   | -435.452107              | 2.800   | -435.263709              | 2.800   | -435.463057               |
| 2.700   | -435.251028              | 2.700   | -435.460659              | 2.700   | -435.266068              | 2.700   | -435.465266               |
| 2.600   | -435.261527              | 2.600   | -435.471002              | 2.600   | -435.269153              | 2.600   | -435.467244               |
| 2.500   | -435.274395              | 2.500   | -435.483424              | 2.500   | -435.273240              | 2.500   | -435.469090               |
| 2.400   | -435.289797              | 2.400   | -435.498159              | 2.400   | -435.278734              | 2.400   | -435.471441               |
| 2.300   | -435.307792              | 2.300   | -435.515342              | 2.300   | -435.286219              | 2.300   | -435.475953               |
| 2.200   | -435.328310              | 2.200   | -435.534965              | 2.200   | -435.296455              | 2.200   | -435.485368               |
| 2.100   | -435.351117              | 2.100   | -435.556799              | 2.100   | -435.310184              | 2.100   | -435.502098               |
| 2.000   | -435.375782              | 2.000   | -435.580140              | 2.000   | -435.327673              | 2.000   | -435.526135               |
| 1.900   | -435.401603              | 1.900   | -435.604435              | 1.900   | -435.348534              | 1.900   | -435.555977               |
| 1.880   | -435.406756              | 1.880   | -435.609322              | 1.700   | -435.391903              | 1.700   | -435.631520               |
| 1.860   | -435.411868              | 1.860   | -435.614170              | 1.600   | -435.411432              | 1.600   | -435.648283               |
| 1.840   | -435.416920              | 1.840   | -435.618961              | 1.590   | -435.412712              | 1.590   | -435.649312               |
| 1.820   | -435.421894              | 1.820   | -435.623673              | 1.580   | -435.413838              | 1.580   | -435.650192               |
| 1.800   | -435.426765              | 1.800   | -435.628284              | 1.570   | -435.414800              | 1.570   | -435.650914               |
| 1.780   | -435.431511              | 1.780   | -435.632768              | 1.560   | -435.415590              | 1.560   | -435.651469               |
| 1.760   | -435.436103              | 1.760   | -435.637096              | 1.550   | -435.416197              | 1.550   | -435.651847               |
| 1.740   | -435.440513              | 1.740   | -435.641236              | 1.540   | -435.416611              | 1.540   | -435.652038               |
| 1.720   | -435.444708              | 1.720   | -435.645156              | 1.539   | -435.416641              | 1.539   | -435.652046               |
| 1.700   | -435.448652              | 1.700   | -435.648815              | 1.538   | -435.416669              | 1.538   | -435.652052               |
| 1.680   | -435.452308              | 1.680   | -435.652171              | 1.537   | -435.416696              | 1.537   | -435.652057               |
| 1.660   | -435.455632              | 1.660   | -435.655175              | 1.536   | -435.416720              | 1.536   | -435.652059               |
| 1.640   | -435.458578              | 1.640   | -435.657771              | 1.535   | -435.416742              | 1.535   | -435.652059               |
| 1.620   | -435.460868              | 1.620   | -435.658044              | 1.534   | -435.416762              | 1.534   | -435.652058               |
| 1.600   | -435.463107              | 1.600   | -435.659928              | 1.533   | -435.416780              | 1.533   | -435.652054               |
| 1.580   | -435.464790              | 1.580   | -435.661275              | 1.532   | -435.416795              | 1.532   | -435.652048               |
| 1.570   | -435.465399              | 1.570   | -435.661720              | 1.531   | -435.416809              | 1.531   | -435.652040               |
| 1.569   | -435.465450              | 1.569   | -435.661756              | 1.530   | -435.416820              | 1.530   | -435.652030               |
| 1.568   | -435.465501              | 1.568   | -435.661791              | 1.529   | -435.416830              | 1.529   | -435.652018               |
| 1.567   | -435.465549              | 1.567   | -435.661824              | 1.528   | -435.416837              | 1.528   | -435.652004               |
| 1.566   | -435.465596              | 1.566   | -435.661855              | 1.527   | -435.416842              | 1.527   | -435.651987               |
| 1.565   | -435.465641              | 1.565   | -435.661885              | 1.526   | -435.416844              | 1.526   | -435.651969               |
| 1.564   | -435.465684              | 1.564   | -435.661913              | 1.525   | -435.416845              | 1.525   | -435.651948               |
| 1.563   | -435.465726              | 1.563   | -435.661939              | 1.524   | -435.416843              | 1.524   | -435.651926               |
| 1.562   | -435.465765              | 1.562   | -435.661964              | 1.523   | -435.416839              | 1.523   | -435.651901               |
| 1.561   | -435.465803              | 1.561   | -435.661987              | 1.522   | -435.416833              | 1.522   | -435.651874               |
| 1.560   | -435.465840              | 1.560   | -435.662008              | 1.521   | -435.416825              | 1.521   | -435.651845               |
| 1.559   | -435.465874              | 1.559   | -435.662027              | 1.520   | -435.416814              | 1.520   | -435.651813               |
| 1.558   | -435.465907              | 1.558   | -435.662045              | 1.510   | -435.416581              | 1.510   | -435.651375               |
| 1.557   | -435.465938              | 1.557   | -435.662061              | 1.500   | -435.416108              | 1.500   | -435.650703               |
| 1.556   | -435.465967              | 1.556   | -435.662075              | 1.490   | -435.415383              | 1.490   | -435.649785               |
| 1.555   | -435.465994              | 1.555   | -435.662087              | 1.480   | -435.414391              | 1.480   | -435.648607               |
| 1.554   | -435.466020              | 1.554   | -435.662098              | 1.470   | -435.413119              | 1.470   | -435.647156               |
| 1.553   | -435.466043              | 1.553   | -435.662107              | 1.460   | -435.411552              | 1.460   | -435.645415               |
| 1.552   | -435.466065              | 1.552   | -435.662113              | 1.450   | -435.409674              | 1.450   | -435.643371               |
| 1.551   | -435.466085              | 1.551   | -435.662119              | 1.440   | -435.407469              | 1.440   | -435.641007               |
| 1.550   | -435.466103              | 1.550   | -435.662122              | 1.430   | -435.404920              | 1.430   | -435.638305               |
| 1.549   | -435.466119              | 1.549   | -435.662123              | 1.420   | -435.402010              | 1.420   | -435.635249               |
| 1.548   | -435.466133              | 1.548   | -435.662123              | 1.410   | -435.398720              | 1.410   | -435.631819               |
| 1.547   | -435.466146              | 1.547   | -435.662120              | 1.400   | -435.395031              | 1.400   | -435.627997               |
| 1.546   | -435.466156              | 1.546   | -435.662116              | 1.300   | -435.331212              | 1.300   | -435.563452               |
| 1.545   | -435.466164              | 1.545   | -435.662110              | 1.200   | -435.198118              | 1.200   | -435.430080               |
| 1.544   | -435.466171              | 1.544   | -435.662102              |         |                          |         |                           |
| 1.543   | -435.466176              | 1.543   | -435.662092              |         |                          |         |                           |
| 1.542   | -435.466178              | 1.542   | -435.662080              |         |                          |         |                           |
| 1.541   | -435.466179              | 1.541   | -435.662066              |         |                          |         |                           |

Continued on next page



Table S2 – Continued from previous page

| $d$ (Å) | $E$ CASSCF<br>(Hartrees) | $d$ (Å) | $E$ CASPT2<br>(Hartrees) | $d$ (Å) | $E$ PNOF7s<br>(Hartrees) | $d$ (Å) | $E$ NOF-MP2<br>(Hartrees) |
|---------|--------------------------|---------|--------------------------|---------|--------------------------|---------|---------------------------|
| 1.540   | -435.466178              | 1.540   | -435.662050              |         |                          |         |                           |
| 1.539   | -435.466174              | 1.539   | -435.662032              |         |                          |         |                           |
| 1.538   | -435.466169              | 1.538   | -435.662013              |         |                          |         |                           |
| 1.537   | -435.466162              | 1.537   | -435.661992              |         |                          |         |                           |
| 1.536   | -435.466152              | 1.536   | -435.661971              |         |                          |         |                           |
| 1.535   | -435.466141              | 1.535   | -435.661943              |         |                          |         |                           |
| 1.534   | -435.466127              | 1.534   | -435.661914              |         |                          |         |                           |
| 1.533   | -435.466112              | 1.533   | -435.661888              |         |                          |         |                           |
| 1.532   | -435.466094              | 1.532   | -435.661857              |         |                          |         |                           |
| 1.531   | -435.466075              | 1.531   | -435.661823              |         |                          |         |                           |
| 1.530   | -435.466053              | 1.530   | -435.661787              |         |                          |         |                           |
| 1.529   | -435.466029              | 1.529   | -435.661749              |         |                          |         |                           |
| 1.528   | -435.466003              | 1.528   | -435.661708              |         |                          |         |                           |
| 1.527   | -435.465975              | 1.527   | -435.661666              |         |                          |         |                           |
| 1.526   | -435.465944              | 1.526   | -435.661622              |         |                          |         |                           |
| 1.525   | -435.465912              | 1.525   | -435.661575              |         |                          |         |                           |
| 1.524   | -435.465877              | 1.524   | -435.661526              |         |                          |         |                           |
| 1.523   | -435.465841              | 1.523   | -435.661475              |         |                          |         |                           |
| 1.522   | -435.465802              | 1.522   | -435.661422              |         |                          |         |                           |
| 1.521   | -435.465760              | 1.521   | -435.661367              |         |                          |         |                           |
| 1.520   | -435.465717              | 1.520   | -435.661309              |         |                          |         |                           |
| 1.519   | -435.465671              | 1.519   | -435.661250              |         |                          |         |                           |
| 1.518   | -435.465623              | 1.518   | -435.661188              |         |                          |         |                           |
| 1.517   | -435.465573              | 1.517   | -435.661124              |         |                          |         |                           |
| 1.516   | -435.465521              | 1.516   | -435.661058              |         |                          |         |                           |
| 1.515   | -435.465466              | 1.515   | -435.660989              |         |                          |         |                           |
| 1.514   | -435.465409              | 1.514   | -435.660918              |         |                          |         |                           |
| 1.513   | -435.465350              | 1.513   | -435.660845              |         |                          |         |                           |
| 1.512   | -435.465288              | 1.512   | -435.660769              |         |                          |         |                           |
| 1.511   | -435.465224              | 1.511   | -435.660692              |         |                          |         |                           |
| 1.510   | -435.465158              | 1.510   | -435.660612              |         |                          |         |                           |
| 1.509   | -435.465089              | 1.509   | -435.660529              |         |                          |         |                           |
| 1.508   | -435.465018              | 1.508   | -435.660444              |         |                          |         |                           |
| 1.507   | -435.464945              | 1.507   | -435.660357              |         |                          |         |                           |
| 1.506   | -435.464869              | 1.506   | -435.660268              |         |                          |         |                           |
| 1.505   | -435.464791              | 1.505   | -435.660176              |         |                          |         |                           |
| 1.504   | -435.464710              | 1.504   | -435.660082              |         |                          |         |                           |
| 1.503   | -435.464627              | 1.503   | -435.659985              |         |                          |         |                           |
| 1.502   | -435.464542              | 1.502   | -435.659886              |         |                          |         |                           |
| 1.501   | -435.464454              | 1.501   | -435.659784              |         |                          |         |                           |
| 1.500   | -435.464364              | 1.500   | -435.659680              |         |                          |         |                           |
| 1.480   | -435.462014              | 1.480   | -435.657061              |         |                          |         |                           |
| 1.460   | -435.458556              | 1.460   | -435.653345              |         |                          |         |                           |
| 1.440   | -435.453866              | 1.440   | -435.648405              |         |                          |         |                           |
| 1.420   | -435.447807              | 1.420   | -435.642106              |         |                          |         |                           |
| 1.400   | -435.440233              | 1.400   | -435.634298              |         |                          |         |                           |
| 1.380   | -435.430982              | 1.380   | -435.624820              |         |                          |         |                           |
| 1.360   | -435.419874              | 1.360   | -435.613495              |         |                          |         |                           |
| 1.340   | -435.406717              | 1.340   | -435.600128              |         |                          |         |                           |
| 1.320   | -435.391296              | 1.320   | -435.584507              |         |                          |         |                           |
| 1.300   | -435.373379              | 1.300   | -435.566398              |         |                          |         |                           |
| 1.280   | -435.352710              | 1.280   | -435.545546              |         |                          |         |                           |
| 1.260   | -435.329009              | 1.260   | -435.521672              |         |                          |         |                           |
| 1.240   | -435.301968              | 1.240   | -435.494467              |         |                          |         |                           |
| 1.220   | -435.271252              | 1.220   | -435.463601              |         |                          |         |                           |
| 1.200   | -435.236494              | 1.200   | -435.428705              |         |                          |         |                           |

**Table S3** Potential energy surface of AIF

| $d$ (Å) | $E$ CASSCF<br>(Hartrees) | $d$ (Å) | $E$ CASPT2<br>(Hartrees) | $d$ (Å) | $E$ PNOF7s<br>(Hartrees) | $d$ (Å) | $E$ NOF-MP2<br>(Hartrees) |
|---------|--------------------------|---------|--------------------------|---------|--------------------------|---------|---------------------------|
| 5.000   | -341.331284              | 5.000   | -341.530801              | 5.000   | -341.367113              | 5.000   | -341.528167               |
| 4.900   | -341.331331              | 4.900   | -341.530864              | 4.900   | -341.367145              | 4.900   | -341.528220               |
| 4.800   | -341.331386              | 4.800   | -341.530940              | 4.700   | -341.369610              | 4.700   | -341.528529               |
| 4.700   | -341.332800              | 4.700   | -341.531035              | 4.600   | -341.369648              | 4.600   | -341.530011               |
| 4.600   | -341.336424              | 4.600   | -341.531152              | 4.500   | -341.369689              | 4.500   | -341.533924               |
| 4.500   | -341.340269              | 4.500   | -341.531302              | 4.400   | -341.369732              | 4.400   | -341.538041               |
| 4.400   | -341.344343              | 4.400   | -341.531501              | 4.300   | -341.369777              | 4.300   | -341.542375               |
| 4.300   | -341.348652              | 4.300   | -341.533400              | 4.200   | -341.369826              | 4.200   | -341.546942               |
| 4.200   | -341.353203              | 4.200   | -341.537876              | 4.100   | -341.369878              | 4.100   | -341.551747               |
| 4.100   | -341.358005              | 4.100   | -341.542621              | 4.000   | -341.369934              | 4.000   | -341.556828               |
| 4.000   | -341.363068              | 4.000   | -341.547646              | 3.900   | -341.369994              | 3.900   | -341.562173               |
| 3.900   | -341.368406              | 3.900   | -341.552961              | 3.800   | -341.370062              | 3.800   | -341.567823               |
| 3.800   | -341.374037              | 3.800   | -341.558585              | 3.700   | -341.378297              | 3.700   | -341.573805               |
| 3.700   | -341.379982              | 3.700   | -341.564543              | 3.600   | -341.381028              | 3.600   | -341.580151               |
| 3.600   | -341.386270              | 3.600   | -341.570858              | 3.500   | -341.388998              | 3.500   | -341.586896               |
| 3.500   | -341.392933              | 3.500   | -341.577566              | 3.400   | -341.395443              | 3.400   | -341.594080               |
| 3.400   | -341.400010              | 3.400   | -341.584706              | 3.300   | -341.402313              | 3.300   | -341.601745               |
| 3.300   | -341.407542              | 3.300   | -341.592320              | 3.200   | -341.409660              | 3.200   | -341.609937               |
| 3.200   | -341.415576              | 3.200   | -341.600454              | 3.100   | -341.417537              | 3.100   | -341.618702               |
| 3.100   | -341.424160              | 3.100   | -341.609159              | 3.000   | -341.426006              | 3.000   | -341.628077               |
| 3.000   | -341.433343              | 3.000   | -341.618484              | 2.900   | -341.435704              | 2.900   | -341.638090               |
| 2.900   | -341.443173              | 2.900   | -341.628478              | 2.800   | -341.445519              | 2.800   | -341.648755               |
| 2.800   | -341.453693              | 2.800   | -341.639182              | 2.700   | -341.456091              | 2.700   | -341.660083               |
| 2.700   | -341.464938              | 2.700   | -341.650628              | 2.600   | -341.467449              | 2.600   | -341.672099               |
| 2.600   | -341.476924              | 2.600   | -341.662828              | 2.500   | -341.479603              | 2.500   | -341.684816               |
| 2.500   | -341.489647              | 2.500   | -341.675771              | 2.400   | -341.492534              | 2.400   | -341.698226               |
| 2.400   | -341.503059              | 2.400   | -341.689411              | 2.300   | -341.506179              | 2.300   | -341.712257               |
| 2.300   | -341.517062              | 2.300   | -341.703642              | 2.200   | -341.520405              | 2.200   | -341.726737               |
| 2.200   | -341.531472              | 2.200   | -341.718282              | 2.100   | -341.534955              | 2.100   | -341.741380               |
| 2.100   | -341.545974              | 2.100   | -341.733022              | 2.000   | -341.549383              | 2.000   | -341.755707               |
| 2.080   | -341.548845              | 2.080   | -341.735941              | 1.990   | -341.550793              | 1.990   | -341.757095               |
| 2.060   | -341.551694              | 2.060   | -341.738840              | 1.970   | -341.553586              | 1.970   | -341.759836               |
| 2.040   | -341.554516              | 2.040   | -341.741712              | 1.950   | -341.556332              | 1.950   | -341.762521               |
| 2.020   | -341.557304              | 2.020   | -341.744551              | 1.930   | -341.559024              | 1.930   | -341.765141               |
| 2.000   | -341.560050              | 2.000   | -341.747348              | 1.910   | -341.561651              | 1.910   | -341.767843               |
| 1.980   | -341.562747              | 1.980   | -341.750099              | 1.890   | -341.564224              | 1.890   | -341.770298               |
| 1.960   | -341.565386              | 1.960   | -341.752793              | 1.870   | -341.566687              | 1.870   | -341.772656               |
| 1.940   | -341.567956              | 1.940   | -341.755421              | 1.850   | -341.569047              | 1.850   | -341.774899               |
| 1.920   | -341.570448              | 1.920   | -341.757972              | 1.830   | -341.571287              | 1.830   | -341.777013               |
| 1.900   | -341.572850              | 1.900   | -341.760435              | 1.810   | -341.573395              | 1.810   | -341.778981               |
| 1.880   | -341.575147              | 1.880   | -341.762796              | 1.790   | -341.575346              | 1.790   | -341.780783               |
| 1.860   | -341.577327              | 1.860   | -341.765041              | 1.770   | -341.577122              | 1.770   | -341.782398               |
| 1.840   | -341.579372              | 1.840   | -341.767155              | 1.750   | -341.578697              | 1.750   | -341.783804               |
| 1.820   | -341.581266              | 1.820   | -341.769121              | 1.730   | -341.580047              | 1.730   | -341.784973               |
| 1.800   | -341.582989              | 1.800   | -341.770919              | 1.710   | -341.581140              | 1.710   | -341.785878               |
| 1.780   | -341.584520              | 1.780   | -341.772528              | 1.690   | -341.581946              | 1.690   | -341.786487               |
| 1.760   | -341.585834              | 1.760   | -341.773925              | 1.670   | -341.582429              | 1.670   | -341.786763               |
| 1.740   | -341.586907              | 1.740   | -341.775084              | 1.669   | -341.582444              | 1.669   | -341.786767               |
| 1.720   | -341.587709              | 1.720   | -341.775977              | 1.668   | -341.582458              | 1.668   | -341.786771               |
| 1.700   | -341.588208              | 1.700   | -341.776571              | 1.667   | -341.582471              | 1.667   | -341.786773               |
| 1.680   | -341.588370              | 1.680   | -341.776833              | 1.666   | -341.582484              | 1.666   | -341.786775               |
| 1.679   | -341.588369              | 1.679   | -341.776837              | 1.665   | -341.582495              | 1.665   | -341.786775               |
| 1.678   | -341.588366              | 1.678   | -341.776840              | 1.664   | -341.582505              | 1.664   | -341.786775               |
| 1.677   | -341.588363              | 1.677   | -341.776842              | 1.663   | -341.582515              | 1.663   | -341.786774               |
| 1.676   | -341.588358              | 1.676   | -341.776842              | 1.662   | -341.582523              | 1.662   | -341.786771               |
| 1.675   | -341.588353              | 1.675   | -341.776842              | 1.661   | -341.582531              | 1.661   | -341.786768               |
| 1.674   | -341.588347              | 1.674   | -341.776841              | 1.660   | -341.582537              | 1.660   | -341.786764               |
| 1.673   | -341.588340              | 1.673   | -341.776839              | 1.659   | -341.582543              | 1.659   | -341.786759               |

*Continued on next page*

Table S3 – Continued from previous page

| $d$ (Å) | $E$ CASSCF<br>(Hartrees) | $d$ (Å) | $E$ CASPT2<br>(Hartrees) | $d$ (Å) | $E$ PNOF7s<br>(Hartrees) | $d$ (Å) | $E$ NOF-MP2<br>(Hartrees) |
|---------|--------------------------|---------|--------------------------|---------|--------------------------|---------|---------------------------|
| 1.672   | -341.588332              | 1.672   | -341.776836              | 1.658   | -341.582547              | 1.658   | -341.786752               |
| 1.671   | -341.588322              | 1.671   | -341.776832              | 1.657   | -341.582551              | 1.657   | -341.786745               |
| 1.670   | -341.588312              | 1.670   | -341.776827              | 1.656   | -341.582554              | 1.656   | -341.786737               |
| 1.669   | -341.588301              | 1.669   | -341.776821              | 1.655   | -341.582555              | 1.655   | -341.786728               |
| 1.668   | -341.588289              | 1.668   | -341.776815              | 1.654   | -341.582556              | 1.654   | -341.786718               |
| 1.667   | -341.588276              | 1.667   | -341.776807              | 1.653   | -341.582556              | 1.653   | -341.786706               |
| 1.666   | -341.588262              | 1.666   | -341.776798              | 1.652   | -341.582555              | 1.652   | -341.786694               |
| 1.665   | -341.588246              | 1.665   | -341.776788              | 1.651   | -341.582552              | 1.651   | -341.786681               |
| 1.664   | -341.588230              | 1.664   | -341.776777              | 1.650   | -341.582549              | 1.650   | -341.786667               |
| 1.663   | -341.588213              | 1.663   | -341.776765              | 1.649   | -341.582545              | 1.649   | -341.786651               |
| 1.662   | -341.588195              | 1.662   | -341.776752              | 1.648   | -341.582539              | 1.648   | -341.786635               |
| 1.661   | -341.588175              | 1.661   | -341.776738              | 1.647   | -341.582533              | 1.647   | -341.786617               |
| 1.660   | -341.588155              | 1.660   | -341.776723              | 1.646   | -341.582526              | 1.646   | -341.786599               |
| 1.659   | -341.588134              | 1.659   | -341.776707              | 1.645   | -341.582517              | 1.645   | -341.786579               |
| 1.658   | -341.588111              | 1.658   | -341.776690              | 1.644   | -341.582508              | 1.644   | -341.786558               |
| 1.657   | -341.588088              | 1.657   | -341.776672              | 1.643   | -341.582497              | 1.643   | -341.786537               |
| 1.656   | -341.588063              | 1.656   | -341.776653              | 1.642   | -341.582485              | 1.642   | -341.786514               |
| 1.655   | -341.588038              | 1.655   | -341.776632              | 1.641   | -341.582473              | 1.641   | -341.786490               |
| 1.654   | -341.588011              | 1.654   | -341.776610              | 1.640   | -341.582459              | 1.640   | -341.786465               |
| 1.653   | -341.587983              | 1.653   | -341.776588              | 1.620   | -341.581949              | 1.620   | -341.785726               |
| 1.652   | -341.587954              | 1.652   | -341.776565              | 1.600   | -341.580955              | 1.600   | -341.784495               |
| 1.651   | -341.587924              | 1.651   | -341.776541              | 1.580   | -341.579420              | 1.580   | -341.782715               |
| 1.650   | -341.587893              | 1.650   | -341.776515              | 1.560   | -341.577280              | 1.560   | -341.780321               |
| 1.649   | -341.587861              | 1.649   | -341.776488              | 1.540   | -341.574463              | 1.540   | -341.777243               |
| 1.648   | -341.587828              | 1.648   | -341.776460              | 1.520   | -341.570891              | 1.520   | -341.773402               |
| 1.647   | -341.587793              | 1.647   | -341.776432              | 1.500   | -341.566476              | 1.500   | -341.768711               |
| 1.646   | -341.587758              | 1.646   | -341.776402              | 1.480   | -341.561141              | 1.480   | -341.763072               |
| 1.645   | -341.587721              | 1.645   | -341.776371              | 1.460   | -341.554735              | 1.460   | -341.756382               |
| 1.644   | -341.587683              | 1.644   | -341.776338              | 1.440   | -341.547168              | 1.440   | -341.748521               |
| 1.643   | -341.587645              | 1.643   | -341.776305              | 1.420   | -341.538865              | 1.420   | -341.739356               |
| 1.642   | -341.587604              | 1.642   | -341.776270              | 1.400   | -341.528596              | 1.400   | -341.728744               |
| 1.641   | -341.587563              | 1.641   | -341.776235              | 1.380   | -341.516716              | 1.380   | -341.716524               |
| 1.640   | -341.587521              | 1.640   | -341.776198              | 1.360   | -341.503051              | 1.360   | -341.702516               |
| 1.639   | -341.587477              | 1.639   | -341.776160              | 1.340   | -341.487404              | 1.340   | -341.686522               |
| 1.638   | -341.587433              | 1.638   | -341.776121              | 1.320   | -341.469553              | 1.320   | -341.668324               |
| 1.637   | -341.587387              | 1.637   | -341.776081              | 1.300   | -341.449254              | 1.300   | -341.647676               |
| 1.636   | -341.587340              | 1.636   | -341.776039              | 1.280   | -341.426245              | 1.280   | -341.624308               |
| 1.635   | -341.587291              | 1.635   | -341.775997              | 1.260   | -341.400204              | 1.260   | -341.597919               |
| 1.634   | -341.587242              | 1.634   | -341.775953              | 1.240   | -341.370807              | 1.240   | -341.568173               |
| 1.633   | -341.587191              | 1.633   | -341.775908              | 1.220   | -341.337683              | 1.220   | -341.534700               |
| 1.632   | -341.587139              | 1.632   | -341.775862              | 1.200   | -341.300417              | 1.200   | -341.497085               |
| 1.631   | -341.587086              | 1.631   | -341.775814              |         |                          |         |                           |
| 1.630   | -341.587032              | 1.630   | -341.775766              |         |                          |         |                           |
| 1.629   | -341.586976              | 1.629   | -341.775716              |         |                          |         |                           |
| 1.628   | -341.586919              | 1.628   | -341.775665              |         |                          |         |                           |
| 1.627   | -341.586861              | 1.627   | -341.775612              |         |                          |         |                           |
| 1.626   | -341.586802              | 1.626   | -341.775559              |         |                          |         |                           |
| 1.625   | -341.586741              | 1.625   | -341.775504              |         |                          |         |                           |
| 1.624   | -341.586680              | 1.624   | -341.775448              |         |                          |         |                           |
| 1.623   | -341.586617              | 1.623   | -341.775391              |         |                          |         |                           |
| 1.622   | -341.586552              | 1.622   | -341.775332              |         |                          |         |                           |
| 1.621   | -341.586487              | 1.621   | -341.775273              |         |                          |         |                           |
| 1.620   | -341.586420              | 1.620   | -341.775211              |         |                          |         |                           |
| 1.600   | -341.584799              | 1.600   | -341.773711              |         |                          |         |                           |
| 1.580   | -341.582600              | 1.580   | -341.771637              |         |                          |         |                           |
| 1.560   | -341.579760              | 1.560   | -341.768927              |         |                          |         |                           |
| 1.540   | -341.576206              | 1.540   | -341.765508              |         |                          |         |                           |
| 1.520   | -341.571861              | 1.520   | -341.761302              |         |                          |         |                           |
| 1.500   | -341.566636              | 1.500   | -341.756221              |         |                          |         |                           |

Continued on next page

Table S3 – Continued from previous page

| $d$ (Å) | $E$ CASSCF<br>(Hartrees) | $d$ (Å) | $E$ CASPT2<br>(Hartrees) | $d$ (Å) | $E$ PNOF7s<br>(Hartrees) | $d$ (Å) | $E$ NOF-MP2<br>(Hartrees) |
|---------|--------------------------|---------|--------------------------|---------|--------------------------|---------|---------------------------|
| 1.480   | -341.560435              | 1.480   | -341.750168              |         |                          |         |                           |
| 1.460   | -341.553150              | 1.460   | -341.743035              |         |                          |         |                           |
| 1.440   | -341.544664              | 1.440   | -341.734702              |         |                          |         |                           |
| 1.420   | -341.534844              | 1.420   | -341.725040              |         |                          |         |                           |
| 1.400   | -341.523546              | 1.400   | -341.713899              |         |                          |         |                           |
| 1.380   | -341.510607              | 1.380   | -341.701118              |         |                          |         |                           |
| 1.360   | -341.495851              | 1.360   | -341.686510              |         |                          |         |                           |
| 1.340   | -341.479080              | 1.340   | -341.669873              |         |                          |         |                           |
| 1.320   | -341.460676              | 1.320   | -341.651023              |         |                          |         |                           |
| 1.300   | -341.439479              | 1.300   | -341.629676              |         |                          |         |                           |
| 1.280   | -341.415531              | 1.280   | -341.605554              |         |                          |         |                           |
| 1.260   | -341.388527              | 1.260   | -341.578353              |         |                          |         |                           |
| 1.240   | -341.358127              | 1.240   | -341.547730              |         |                          |         |                           |
| 1.220   | -341.323956              | 1.220   | -341.513312              |         |                          |         |                           |
| 1.200   | -341.285595              | 1.200   | -341.474681              |         |                          |         |                           |

Table S4 Potential energy surface of CIF

| $d$ (Å) | $E$ CASSCF<br>(Hartrees) | $d$ (Å) | $E$ CASPT2<br>(Hartrees) | $d$ (Å) | $E$ PNOF7s<br>(Hartrees) | $d$ (Å) | $E$ NOF-MP2<br>(Hartrees) |
|---------|--------------------------|---------|--------------------------|---------|--------------------------|---------|---------------------------|
| 5.000   | -558.954151              | 5.000   | -559.261142              | 5.000   | -558.945326              | 5.000   | -559.231179               |
| 4.900   | -558.954142              | 4.900   | -559.261138              | 4.900   | -558.945319              | 4.900   | -559.231111               |
| 4.800   | -558.954134              | 4.800   | -559.261135              | 4.800   | -558.945310              | 4.800   | -559.231043               |
| 4.700   | -558.954124              | 4.700   | -559.261131              | 4.700   | -558.945301              | 4.700   | -559.230960               |
| 4.600   | -558.954114              | 4.600   | -559.261128              | 4.600   | -558.945291              | 4.600   | -559.230862               |
| 4.500   | -558.954103              | 4.500   | -559.261125              | 4.500   | -558.945281              | 4.500   | -559.230754               |
| 4.400   | -558.954091              | 4.400   | -559.261123              | 4.400   | -558.945269              | 4.400   | -559.230640               |
| 4.300   | -558.954079              | 4.300   | -559.261124              | 4.300   | -558.945256              | 4.300   | -559.230505               |
| 4.200   | -558.954067              | 4.200   | -559.261126              | 4.200   | -558.945242              | 4.200   | -559.230353               |
| 4.100   | -558.954056              | 4.100   | -559.261133              | 4.100   | -558.945227              | 4.100   | -559.230180               |
| 4.000   | -558.954047              | 4.000   | -559.261145              | 4.000   | -558.945211              | 4.000   | -559.229988               |
| 3.900   | -558.954041              | 3.900   | -559.261166              | 3.900   | -558.945195              | 3.900   | -559.229752               |
| 3.800   | -558.954041              | 3.800   | -559.261198              | 3.800   | -558.945181              | 3.800   | -559.229479               |
| 3.700   | -558.954052              | 3.700   | -559.261248              | 3.700   | -558.945170              | 3.700   | -559.229167               |
| 3.600   | -558.954079              | 3.600   | -559.261325              | 3.600   | -558.945166              | 3.600   | -559.228800               |
| 3.500   | -558.954132              | 3.500   | -559.261438              | 3.500   | -558.945173              | 3.500   | -559.228373               |
| 3.400   | -558.954224              | 3.400   | -559.261605              | 3.400   | -558.945200              | 3.400   | -559.227895               |
| 3.300   | -558.954376              | 3.300   | -559.261849              | 3.300   | -558.945256              | 3.300   | -559.227364               |
| 3.200   | -558.954615              | 3.200   | -559.262204              | 3.200   | -558.945357              | 3.200   | -559.226807               |
| 3.100   | -558.954984              | 3.100   | -559.262714              | 3.100   | -558.945527              | 3.100   | -559.226288               |
| 3.000   | -558.955540              | 3.000   | -559.263446              | 3.000   | -558.945799              | 3.000   | -559.225923               |
| 2.900   | -558.956365              | 2.900   | -559.264485              | 2.900   | -558.946218              | 2.900   | -559.225911               |
| 2.800   | -558.957574              | 2.800   | -559.265951              | 2.800   | -558.946850              | 2.800   | -559.226565               |
| 2.700   | -558.959320              | 2.700   | -559.267994              | 2.700   | -558.947786              | 2.700   | -559.228326               |
| 2.600   | -558.961803              | 2.600   | -559.270805              | 2.600   | -558.949148              | 2.600   | -559.231737               |
| 2.500   | -558.965274              | 2.500   | -559.274602              | 2.500   | -558.951092              | 2.500   | -559.237343               |
| 2.400   | -558.970023              | 2.400   | -559.279657              | 2.400   | -558.953804              | 2.400   | -559.245515               |
| 2.300   | -558.976352              | 2.300   | -559.286095              | 2.300   | -558.957484              | 2.300   | -559.256264               |
| 2.200   | -558.984511              | 2.200   | -559.294080              | 2.200   | -558.962308              | 2.200   | -559.269254               |
| 2.100   | -558.994583              | 2.100   | -559.303568              | 2.100   | -558.968369              | 2.100   | -559.283959               |
| 2.000   | -559.006326              | 2.000   | -559.314236              | 2.000   | -558.975562              | 2.000   | -559.299824               |
| 1.980   | -559.008819              | 1.980   | -559.316455              | 1.900   | -558.983423              | 1.900   | -559.316089               |
| 1.960   | -559.011341              | 1.960   | -559.318686              | 1.800   | -558.990910              | 1.800   | -559.331295               |
| 1.940   | -559.013881              | 1.940   | -559.320919              | 1.790   | -558.991574              | 1.790   | -559.332668               |
| 1.920   | -559.016427              | 1.920   | -559.323144              | 1.780   | -558.992213              | 1.780   | -559.334002               |
| 1.900   | -559.018966              | 1.900   | -559.325350              | 1.770   | -558.992826              | 1.770   | -559.335294               |
| 1.880   | -559.021483              | 1.880   | -559.327522              | 1.760   | -558.993409              | 1.760   | -559.336539               |
| 1.860   | -559.023960              | 1.860   | -559.329647              | 1.750   | -558.993959              | 1.750   | -559.337736               |

Continued on next page

Table S4 – Continued from previous page

| $d$ (Å) | $E$ CASSCF<br>(Hartrees) | $d$ (Å) | $E$ CASPT2<br>(Hartrees) | $d$ (Å) | $E$ PNOF7s<br>(Hartrees) | $d$ (Å) | $E$ NOF-MP2<br>(Hartrees) |
|---------|--------------------------|---------|--------------------------|---------|--------------------------|---------|---------------------------|
| 1.840   | -559.026380              | 1.840   | -559.331710              | 1.740   | -558.994473              | 1.740   | -559.338878               |
| 1.820   | -559.028723              | 1.820   | -559.333692              | 1.730   | -558.994949              | 1.730   | -559.339963               |
| 1.800   | -559.030966              | 1.800   | -559.335574              | 1.720   | -558.995382              | 1.720   | -559.340986               |
| 1.780   | -559.033085              | 1.780   | -559.337334              | 1.710   | -558.995769              | 1.710   | -559.341943               |
| 1.760   | -559.035055              | 1.760   | -559.338948              | 1.700   | -558.996106              | 1.700   | -559.342829               |
| 1.740   | -559.036846              | 1.740   | -559.340390              | 1.690   | -558.996390              | 1.690   | -559.343640               |
| 1.720   | -559.038428              | 1.720   | -559.341631              | 1.680   | -558.996615              | 1.680   | -559.344371               |
| 1.700   | -559.039767              | 1.700   | -559.342638              | 1.670   | -558.996779              | 1.670   | -559.345016               |
| 1.680   | -559.040827              | 1.680   | -559.343376              | 1.660   | -558.996877              | 1.660   | -559.345572               |
| 1.660   | -559.041568              | 1.660   | -559.343807              | 1.659   | -558.996882              | 1.659   | -559.345622               |
| 1.659   | -559.041596              | 1.659   | -559.343818              | 1.658   | -558.996888              | 1.658   | -559.345672               |
| 1.658   | -559.041623              | 1.658   | -559.343831              | 1.657   | -558.996892              | 1.657   | -559.345720               |
| 1.657   | -559.041649              | 1.657   | -559.343841              | 1.656   | -558.996896              | 1.656   | -559.345767               |
| 1.656   | -559.041674              | 1.656   | -559.343853              | 1.655   | -558.996899              | 1.655   | -559.345814               |
| 1.655   | -559.041698              | 1.655   | -559.343860              | 1.654   | -558.996901              | 1.654   | -559.345859               |
| 1.654   | -559.041721              | 1.654   | -559.343870              | 1.653   | -558.996902              | 1.653   | -559.345904               |
| 1.653   | -559.041744              | 1.653   | -559.343876              | 1.652   | -558.996903              | 1.652   | -559.345947               |
| 1.652   | -559.041765              | 1.652   | -559.343884              | 1.651   | -558.996903              | 1.651   | -559.345989               |
| 1.651   | -559.041786              | 1.651   | -559.343888              | 1.650   | -558.996902              | 1.650   | -559.346031               |
| 1.650   | -559.041805              | 1.650   | -559.343895              | 1.649   | -558.996900              | 1.649   | -559.346071               |
| 1.649   | -559.041824              | 1.649   | -559.343896              | 1.648   | -558.996898              | 1.648   | -559.346110               |
| 1.648   | -559.041841              | 1.648   | -559.343901              | 1.647   | -558.996895              | 1.647   | -559.346149               |
| 1.647   | -559.041858              | 1.647   | -559.343901              | 1.646   | -558.996891              | 1.646   | -559.346186               |
| 1.646   | -559.041874              | 1.646   | -559.343904              | 1.645   | -558.996886              | 1.645   | -559.346222               |
| 1.645   | -559.041888              | 1.645   | -559.343902              | 1.644   | -558.996881              | 1.644   | -559.346257               |
| 1.644   | -559.041902              | 1.644   | -559.343903              | 1.643   | -558.996874              | 1.643   | -559.346291               |
| 1.643   | -559.041915              | 1.643   | -559.343899              | 1.642   | -558.996867              | 1.642   | -559.346324               |
| 1.642   | -559.041926              | 1.642   | -559.343898              | 1.641   | -558.996859              | 1.641   | -559.346356               |
| 1.641   | -559.041937              | 1.641   | -559.343894              | 1.640   | -558.996850              | 1.640   | -559.346387               |
| 1.640   | -559.041947              | 1.640   | -559.343888              | 1.640   | -558.996850              | 1.640   | -559.346387               |
| 1.639   | -559.041955              | 1.639   | -559.343884              | 1.630   | -558.996717              | 1.630   | -559.346637               |
| 1.638   | -559.041963              | 1.638   | -559.343877              | 1.620   | -558.996496              | 1.620   | -559.346774               |
| 1.637   | -559.041969              | 1.637   | -559.343867              | 1.600   | -558.995767              | 1.600   | -559.346682               |
| 1.636   | -559.041975              | 1.636   | -559.343860              | 1.590   | -558.995246              | 1.590   | -559.346440               |
| 1.635   | -559.041979              | 1.635   | -559.343850              | 1.580   | -558.994612              | 1.580   | -559.346058               |
| 1.634   | -559.041983              | 1.634   | -559.343838              | 1.570   | -558.993857              | 1.570   | -559.345529               |
| 1.633   | -559.041985              | 1.633   | -559.343828              | 1.560   | -558.992973              | 1.560   | -559.344844               |
| 1.632   | -559.041986              | 1.632   | -559.343815              | 1.550   | -558.991952              | 1.550   | -559.343996               |
| 1.631   | -559.041987              | 1.631   | -559.343801              | 1.540   | -558.990784              | 1.540   | -559.342977               |
| 1.630   | -559.041986              | 1.630   | -559.343786              | 1.530   | -558.989462              | 1.530   | -559.341777               |
| 1.629   | -559.041984              | 1.629   | -559.343769              | 1.520   | -558.987974              | 1.520   | -559.340388               |
| 1.628   | -559.041981              | 1.628   | -559.343755              | 1.510   | -558.986310              | 1.510   | -559.338800               |
| 1.627   | -559.041977              | 1.627   | -559.343739              | 1.500   | -558.984460              | 1.500   | -559.337003               |
| 1.626   | -559.041972              | 1.626   | -559.343718              | 1.490   | -558.982411              | 1.490   | -559.334986               |
| 1.625   | -559.041965              | 1.625   | -559.343698              | 1.480   | -558.980151              | 1.480   | -559.332738               |
| 1.624   | -559.041958              | 1.624   | -559.343677              | 1.470   | -558.977668              | 1.470   | -559.330247               |
| 1.623   | -559.041949              | 1.623   | -559.343654              | 1.460   | -558.974947              | 1.460   | -559.327502               |
| 1.622   | -559.041939              | 1.622   | -559.343631              | 1.450   | -558.971976              | 1.450   | -559.324489               |
| 1.621   | -559.041929              | 1.621   | -559.343606              | 1.440   | -558.968738              | 1.440   | -559.321194               |
| 1.620   | -559.041917              | 1.620   | -559.343580              | 1.430   | -558.965219              | 1.430   | -559.317604               |
| 1.619   | -559.041903              | 1.619   | -559.343553              | 1.420   | -558.961401              | 1.420   | -559.313704               |
| 1.618   | -559.041889              | 1.618   | -559.343525              | 1.410   | -558.957269              | 1.410   | -559.309477               |
| 1.617   | -559.041874              | 1.617   | -559.343496              | 1.400   | -558.952804              | 1.400   | -559.304908               |
| 1.616   | -559.041857              | 1.616   | -559.343466              |         |                          | 1.300   | -559.235896               |
| 1.615   | -559.041839              | 1.615   | -559.343435              |         |                          |         |                           |
| 1.614   | -559.041820              | 1.614   | -559.343402              |         |                          |         |                           |
| 1.613   | -559.041800              | 1.613   | -559.343368              |         |                          |         |                           |
| 1.612   | -559.041779              | 1.612   | -559.343334              |         |                          |         |                           |
| 1.611   | -559.041756              | 1.611   | -559.343298              |         |                          |         |                           |

Continued on next page

Table S4 – Continued from previous page

| $d$ (Å) | $E$ CASSCF<br>(Hartrees) | $d$ (Å) | $E$ CASPT2<br>(Hartrees) | $d$ (Å) | $E$ PNOF7s<br>(Hartrees) | $d$ (Å) | $E$ NOF-MP2<br>(Hartrees) |
|---------|--------------------------|---------|--------------------------|---------|--------------------------|---------|---------------------------|
| 1.610   | -559.041732              | 1.610   | -559.343260              |         |                          |         |                           |
| 1.609   | -559.041707              | 1.609   | -559.343222              |         |                          |         |                           |
| 1.608   | -559.041681              | 1.608   | -559.343182              |         |                          |         |                           |
| 1.607   | -559.041654              | 1.607   | -559.343142              |         |                          |         |                           |
| 1.606   | -559.041625              | 1.606   | -559.343100              |         |                          |         |                           |
| 1.605   | -559.041595              | 1.605   | -559.343057              |         |                          |         |                           |
| 1.604   | -559.041564              | 1.604   | -559.343012              |         |                          |         |                           |
| 1.603   | -559.041532              | 1.603   | -559.342967              |         |                          |         |                           |
| 1.602   | -559.041498              | 1.602   | -559.342920              |         |                          |         |                           |
| 1.601   | -559.041463              | 1.601   | -559.342872              |         |                          |         |                           |
| 1.600   | -559.041427              | 1.600   | -559.342822              |         |                          |         |                           |
| 1.580   | -559.040421              | 1.580   | -559.341563              |         |                          |         |                           |
| 1.560   | -559.038838              | 1.560   | -559.339743              |         |                          |         |                           |
| 1.540   | -559.036612              | 1.540   | -559.337295              |         |                          |         |                           |
| 1.520   | -559.033670              | 1.520   | -559.334146              |         |                          |         |                           |
| 1.500   | -559.029930              | 1.500   | -559.330217              |         |                          |         |                           |
| 1.480   | -559.025306              | 1.480   | -559.325419              |         |                          |         |                           |
| 1.460   | -559.019699              | 1.460   | -559.319654              |         |                          |         |                           |
| 1.440   | -559.013003              | 1.440   | -559.312816              |         |                          |         |                           |
| 1.420   | -559.005100              | 1.420   | -559.304786              |         |                          |         |                           |
| 1.400   | -558.995860              | 1.400   | -559.295435              |         |                          |         |                           |
|         |                          | 1.380   | -559.284617              |         |                          |         |                           |
|         |                          | 1.360   | -559.272173              |         |                          |         |                           |
|         |                          | 1.340   | -559.257923              |         |                          |         |                           |
|         |                          | 1.320   | -559.241671              |         |                          |         |                           |
|         |                          | 1.300   | -559.223198              |         |                          |         |                           |

Table S5 Potential energy surface of NH

| $d$ (Å) | $E$ CASSCF<br>(Hartrees) | $d$ (Å) | $E$ CASPT2<br>(Hartrees) | $d$ (Å) | $E$ PNOF7s<br>(Hartrees) | $d$ (Å) | $E$ NOF-MP2<br>(Hartrees) |
|---------|--------------------------|---------|--------------------------|---------|--------------------------|---------|---------------------------|
| 5.000   | -54.897170               | 5.000   | -55.008349               | 5.000   | -54.902284               | 5.000   | -54.984001                |
| 4.800   | -54.897172               | 4.800   | -55.008355               | 4.900   | -54.902285               | 4.900   | -54.984025                |
| 4.600   | -54.897175               | 4.600   | -55.008363               | 4.800   | -54.902287               | 4.800   | -54.984057                |
| 4.500   | -54.897177               | 4.500   | -55.008368               | 4.700   | -54.902289               | 4.700   | -54.984096                |
| 4.400   | -54.897180               | 4.400   | -55.008375               | 4.600   | -54.902291               | 4.600   | -54.984144                |
| 4.300   | -54.897182               | 4.300   | -55.008383               | 4.500   | -54.902294               | 4.500   | -54.984203                |
| 4.200   | -54.897186               | 4.200   | -55.008393               | 4.400   | -54.902297               | 4.400   | -54.984275                |
| 4.100   | -54.897190               | 4.100   | -55.008405               | 4.300   | -54.902301               | 4.300   | -54.984361                |
| 4.000   | -54.897195               | 4.000   | -55.008420               | 4.200   | -54.902306               | 4.200   | -54.984459                |
| 3.900   | -54.897201               | 3.900   | -55.008438               | 4.100   | -54.902313               | 4.100   | -54.984576                |
| 3.800   | -54.897209               | 3.800   | -55.008461               | 4.000   | -54.902322               | 4.000   | -54.984713                |
| 3.700   | -54.897219               | 3.700   | -55.008490               | 3.900   | -54.902334               | 3.900   | -54.984868                |
| 3.600   | -54.897232               | 3.600   | -55.008527               | 3.800   | -54.902350               | 3.800   | -54.985044                |
| 3.500   | -54.897248               | 3.500   | -55.008574               | 3.700   | -54.902372               | 3.700   | -54.985243                |
| 3.400   | -54.897270               | 3.400   | -55.008634               | 3.600   | -54.902401               | 3.600   | -54.985459                |
| 3.300   | -54.897299               | 3.300   | -55.008713               | 3.500   | -54.902440               | 3.500   | -54.985714                |
| 3.200   | -54.897339               | 3.200   | -55.008818               | 3.400   | -54.902494               | 3.400   | -54.985973                |
| 3.100   | -54.897395               | 3.100   | -55.008958               | 3.300   | -54.902568               | 3.300   | -54.986246                |
| 3.000   | -54.897474               | 3.000   | -55.009147               | 3.200   | -54.902671               | 3.200   | -54.986529                |
| 2.900   | -54.897586               | 2.900   | -55.009405               | 3.100   | -54.902813               | 3.100   | -54.986813                |
| 2.800   | -54.897744               | 2.800   | -55.009758               | 3.000   | -54.903008               | 3.000   | -54.987099                |
| 2.700   | -54.897970               | 2.700   | -55.010242               | 2.900   | -54.903277               | 2.900   | -54.987371                |
| 2.600   | -54.898293               | 2.600   | -55.010910               | 2.800   | -54.903646               | 2.800   | -54.987635                |
| 2.500   | -54.898761               | 2.500   | -55.011832               | 2.700   | -54.904146               | 2.700   | -54.987878                |
| 2.400   | -54.899442               | 2.400   | -55.013112               | 2.600   | -54.904824               | 2.600   | -54.988120                |
| 2.300   | -54.900445               | 2.300   | -55.014890               | 2.500   | -54.905737               | 2.500   | -54.988394                |
| 2.200   | -54.901923               | 2.200   | -55.017356               | 2.400   | -54.906961               | 2.400   | -54.988776                |

Continued on next page

Table S5 – Continued from previous page

| $d$ (Å) | $E$ CASSCF<br>(Hartrees) | $d$ (Å) | $E$ CASPT2<br>(Hartrees) | $d$ (Å) | $E$ PNOF7s<br>(Hartrees) | $d$ (Å) | $E$ NOF-MP2<br>(Hartrees) |
|---------|--------------------------|---------|--------------------------|---------|--------------------------|---------|---------------------------|
| 2.100   | -54.904092               | 2.100   | -55.020746               | 2.300   | -54.908596               | 2.300   | -54.989397                |
| 2.000   | -54.907225               | 2.000   | -55.025338               | 2.200   | -54.910765               | 2.200   | -54.990437                |
| 1.900   | -54.911641               | 1.900   | -55.031420               | 2.100   | -54.913617               | 2.100   | -54.992185                |
| 1.800   | -54.917652               | 1.800   | -55.039254               | 2.000   | -54.917326               | 2.000   | -54.995008                |
| 1.700   | -54.925508               | 1.700   | -55.049029               | 1.900   | -54.922082               | 1.900   | -54.999331                |
| 1.600   | -54.935318               | 1.600   | -55.060789               | 1.800   | -54.928084               | 1.800   | -55.005603                |
| 1.500   | -54.946988               | 1.500   | -55.074382               | 1.700   | -54.935525               | 1.700   | -55.014213                |
| 1.400   | -54.960127               | 1.400   | -55.089348               | 1.600   | -54.944556               | 1.600   | -55.025388                |
| 1.380   | -54.962867               | 1.380   | -55.092435               | 1.590   | -54.945550               | 1.590   | -55.026649                |
| 1.360   | -54.965623               | 1.360   | -55.095532               | 1.580   | -54.946561               | 1.580   | -55.027935                |
| 1.340   | -54.968386               | 1.340   | -55.098627               | 1.570   | -54.947588               | 1.570   | -55.029245                |
| 1.320   | -54.971143               | 1.320   | -55.101707               | 1.560   | -54.948632               | 1.560   | -55.030581                |
| 1.300   | -54.973879               | 1.300   | -55.104758               | 1.550   | -54.949692               | 1.550   | -55.031942                |
| 1.280   | -54.976579               | 1.280   | -55.107764               | 1.540   | -54.950768               | 1.540   | -55.033323                |
| 1.260   | -54.979225               | 1.260   | -55.110706               | 1.530   | -54.951860               | 1.530   | -55.034730                |
| 1.240   | -54.981798               | 1.240   | -55.113565               | 1.520   | -54.952969               | 1.520   | -55.036162                |
| 1.220   | -54.984274               | 1.220   | -55.116318               | 1.510   | -54.954093               | 1.510   | -55.037616                |
| 1.200   | -54.986630               | 1.200   | -55.118940               | 1.500   | -54.955233               | 1.500   | -55.039088                |
| 1.180   | -54.988837               | 1.180   | -55.121403               | 1.490   | -54.956388               | 1.490   | -55.040582                |
| 1.160   | -54.990864               | 1.160   | -55.123676               | 1.480   | -54.957558               | 1.480   | -55.042098                |
| 1.140   | -54.992676               | 1.140   | -55.125723               | 1.470   | -54.958742               | 1.470   | -55.043634                |
| 1.120   | -54.994235               | 1.120   | -55.127508               | 1.460   | -54.959941               | 1.460   | -55.045187                |
| 1.100   | -54.995496               | 1.100   | -55.128985               | 1.450   | -54.961154               | 1.450   | -55.046758                |
| 1.080   | -54.996411               | 1.080   | -55.130106               | 1.440   | -54.962380               | 1.440   | -55.048345                |
| 1.060   | -54.996925               | 1.060   | -55.130819               | 1.430   | -54.963619               | 1.430   | -55.049948                |
| 1.059   | -54.996939               | 1.059   | -55.130843               | 1.420   | -54.964870               | 1.420   | -55.051566                |
| 1.058   | -54.996952               | 1.058   | -55.130865               | 1.410   | -54.966133               | 1.410   | -55.053194                |
| 1.057   | -54.996964               | 1.057   | -55.130887               | 1.400   | -54.967407               | 1.400   | -55.054836                |
| 1.056   | -54.996975               | 1.056   | -55.130907               | 1.390   | -54.968691               | 1.390   | -55.056489                |
| 1.055   | -54.996984               | 1.055   | -55.130926               | 1.380   | -54.969985               | 1.380   | -55.058150                |
| 1.054   | -54.996992               | 1.054   | -55.130944               | 1.370   | -54.971286               | 1.370   | -55.059820                |
| 1.053   | -54.996999               | 1.053   | -55.130960               | 1.360   | -54.972596               | 1.360   | -55.061490                |
| 1.052   | -54.997005               | 1.052   | -55.130976               | 1.350   | -54.973912               | 1.350   | -55.063169                |
| 1.051   | -54.997010               | 1.051   | -55.130990               | 1.340   | -54.975233               | 1.340   | -55.064850                |
| 1.050   | -54.997013               | 1.050   | -55.131003               | 1.330   | -54.976558               | 1.330   | -55.066530                |
| 1.049   | -54.997016               | 1.049   | -55.131014               | 1.320   | -54.977886               | 1.320   | -55.068209                |
| 1.048   | -54.997016               | 1.048   | -55.131025               | 1.310   | -54.979214               | 1.310   | -55.069883                |
| 1.047   | -54.997016               | 1.047   | -55.131034               | 1.300   | -54.980542               | 1.300   | -55.071550                |
| 1.046   | -54.997015               | 1.046   | -55.131041               | 1.290   | -54.981868               | 1.290   | -55.073209                |
| 1.045   | -54.997012               | 1.045   | -55.131048               | 1.280   | -54.983189               | 1.280   | -55.074856                |
| 1.044   | -54.997008               | 1.044   | -55.131053               | 1.270   | -54.984503               | 1.270   | -55.076488                |
| 1.043   | -54.997002               | 1.043   | -55.131057               | 1.260   | -54.985809               | 1.260   | -55.078101                |
| 1.042   | -54.996995               | 1.042   | -55.131060               | 1.250   | -54.987103               | 1.250   | -55.079698                |
| 1.041   | -54.996987               | 1.041   | -55.131061               | 1.240   | -54.988382               | 1.240   | -55.081268                |
| 1.040   | -54.996978               | 1.040   | -55.131061               | 1.230   | -54.989644               | 1.230   | -55.082812                |
| 1.039   | -54.996967               | 1.039   | -55.131059               | 1.220   | -54.990886               | 1.220   | -55.084326                |
| 1.038   | -54.996955               | 1.038   | -55.131057               | 1.210   | -54.992103               | 1.210   | -55.085805                |
| 1.037   | -54.996942               | 1.037   | -55.131053               | 1.200   | -54.993293               | 1.200   | -55.087245                |
| 1.036   | -54.996927               | 1.036   | -55.131046               | 1.190   | -54.994452               | 1.190   | -55.088643                |
| 1.035   | -54.996911               | 1.035   | -55.131040               | 1.180   | -54.995575               | 1.180   | -55.089996                |
| 1.034   | -54.996894               | 1.034   | -55.131032               | 1.170   | -54.996658               | 1.170   | -55.091297                |
| 1.033   | -54.996875               | 1.033   | -55.131022               | 1.160   | -54.997697               | 1.160   | -55.092543                |
| 1.032   | -54.996855               | 1.032   | -55.131011               | 1.150   | -54.998686               | 1.150   | -55.093729                |
| 1.031   | -54.996834               | 1.031   | -55.130998               | 1.140   | -54.999622               | 1.140   | -55.094850                |
| 1.030   | -54.996811               | 1.030   | -55.130985               | 1.130   | -55.000497               | 1.130   | -55.095901                |
| 1.029   | -54.996786               | 1.029   | -55.130969               | 1.120   | -55.001308               | 1.120   | -55.096876                |
| 1.028   | -54.996760               | 1.028   | -55.130952               | 1.110   | -55.002047               | 1.110   | -55.097770                |
| 1.027   | -54.996733               | 1.027   | -55.130934               | 1.100   | -55.002709               | 1.100   | -55.098578                |
| 1.026   | -54.996705               | 1.026   | -55.130914               | 1.090   | -55.003288               | 1.090   | -55.099291                |

Continued on next page

Table S5 – Continued from previous page

| $d$ (Å) | $E$ CASSCF<br>(Hartrees) | $d$ (Å) | $E$ CASPT2<br>(Hartrees) | $d$ (Å) | $E$ PNOF7s<br>(Hartrees) | $d$ (Å) | $E$ NOF-MP2<br>(Hartrees) |
|---------|--------------------------|---------|--------------------------|---------|--------------------------|---------|---------------------------|
| 1.025   | -54.996674               | 1.025   | -55.130893               | 1.080   | -55.003775               | 1.080   | -55.099905                |
| 1.024   | -54.996643               | 1.024   | -55.130871               | 1.070   | -55.004165               | 1.070   | -55.100412                |
| 1.023   | -54.996610               | 1.023   | -55.130846               | 1.060   | -55.004449               | 1.060   | -55.100805                |
| 1.022   | -54.996575               | 1.022   | -55.130821               | 1.059   | -55.004472               | 1.059   | -55.100838                |
| 1.021   | -54.996539               | 1.021   | -55.130794               | 1.058   | -55.004493               | 1.058   | -55.100869                |
| 1.020   | -54.996502               | 1.020   | -55.130765               | 1.057   | -55.004513               | 1.057   | -55.100900                |
| 1.019   | -54.996462               | 1.019   | -55.130735               | 1.056   | -55.004532               | 1.056   | -55.100929                |
| 1.018   | -54.996422               | 1.018   | -55.130703               | 1.055   | -55.004550               | 1.055   | -55.100957                |
| 1.017   | -54.996380               | 1.017   | -55.130670               | 1.054   | -55.004566               | 1.054   | -55.100983                |
| 1.016   | -54.996336               | 1.016   | -55.130635               | 1.053   | -55.004581               | 1.053   | -55.101008                |
| 1.015   | -54.996291               | 1.015   | -55.130598               | 1.052   | -55.004596               | 1.052   | -55.101032                |
| 1.014   | -54.996244               | 1.014   | -55.130560               | 1.051   | -55.004609               | 1.051   | -55.101055                |
| 1.013   | -54.996196               | 1.013   | -55.130521               | 1.050   | -55.004620               | 1.050   | -55.101077                |
| 1.012   | -54.996146               | 1.012   | -55.130479               | 1.049   | -55.004631               | 1.049   | -55.101097                |
| 1.011   | -54.996094               | 1.011   | -55.130436               | 1.048   | -55.004640               | 1.048   | -55.101115                |
| 1.010   | -54.996041               | 1.010   | -55.130392               | 1.047   | -55.004648               | 1.047   | -55.101133                |
| 1.009   | -54.995986               | 1.009   | -55.130346               | 1.046   | -55.004655               | 1.046   | -55.101149                |
| 1.008   | -54.995930               | 1.008   | -55.130298               | 1.045   | -55.004661               | 1.045   | -55.101164                |
| 1.007   | -54.995872               | 1.007   | -55.130249               | 1.044   | -55.004665               | 1.044   | -55.101178                |
| 1.006   | -54.995812               | 1.006   | -55.130198               | 1.043   | -55.004668               | 1.043   | -55.101190                |
| 1.005   | -54.995751               | 1.005   | -55.130145               | 1.042   | -55.004670               | 1.042   | -55.101201                |
| 1.004   | -54.995688               | 1.004   | -55.130090               | 1.041   | -55.004670               | 1.041   | -55.101210                |
| 1.003   | -54.995623               | 1.003   | -55.130034               | 1.040   | -55.004669               | 1.040   | -55.101218                |
| 1.002   | -54.995557               | 1.002   | -55.129976               | 1.039   | -55.004667               | 1.039   | -55.101225                |
| 1.001   | -54.995489               | 1.001   | -55.129917               | 1.038   | -55.004664               | 1.038   | -55.101230                |
| 1.000   | -54.995419               | 1.000   | -55.129855               | 1.037   | -55.004659               | 1.037   | -55.101234                |
| 0.980   | -54.993645               | 0.980   | -55.128247               | 1.036   | -55.004653               | 1.036   | -55.101237                |
| 0.960   | -54.991084               | 0.960   | -55.125844               | 1.035   | -55.004645               | 1.035   | -55.101238                |
| 0.940   | -54.987628               | 0.940   | -55.122539               | 1.034   | -55.004636               | 1.034   | -55.101237                |
| 0.920   | -54.983155               | 0.920   | -55.118211               | 1.033   | -55.004626               | 1.033   | -55.101235                |
| 0.900   | -54.977531               | 0.900   | -55.112726               | 1.032   | -55.004614               | 1.032   | -55.101232                |
| 0.880   | -54.970601               | 0.880   | -55.105929               | 1.031   | -55.004601               | 1.031   | -55.101228                |
| 0.860   | -54.962192               | 0.860   | -55.097649               | 1.030   | -55.004587               | 1.030   | -55.101221                |
| 0.840   | -54.952111               | 0.840   | -55.087692               | 1.029   | -55.004571               | 1.029   | -55.101214                |
| 0.820   | -54.940137               | 0.820   | -55.075837               | 1.028   | -55.004554               | 1.028   | -55.101205                |
| 0.800   | -54.926022               | 0.800   | -55.061839               | 1.027   | -55.004536               | 1.027   | -55.101194                |
| 0.780   | -54.909484               | 0.780   | -55.045415               | 1.026   | -55.004516               | 1.026   | -55.101182                |
| 0.760   | -54.890203               | 0.760   | -55.026246               | 1.025   | -55.004494               | 1.025   | -55.101168                |
| 0.740   | -54.867819               | 0.740   | -55.003974               | 1.024   | -55.004471               | 1.024   | -55.101153                |
| 0.720   | -54.841919               | 0.720   | -54.978186               | 1.023   | -55.004447               | 1.023   | -55.101137                |
| 0.700   | -54.812032               | 0.700   | -54.948415               | 1.022   | -55.004421               | 1.022   | -55.101118                |
|         |                          |         |                          | 1.021   | -55.004394               | 1.021   | -55.101098                |
|         |                          |         |                          | 1.020   | -55.004365               | 1.020   | -55.101077                |
|         |                          |         |                          | 1.019   | -55.004334               | 1.019   | -55.101054                |
|         |                          |         |                          | 1.018   | -55.004303               | 1.018   | -55.101030                |
|         |                          |         |                          | 1.017   | -55.004269               | 1.017   | -55.101004                |
|         |                          |         |                          | 1.016   | -55.004234               | 1.016   | -55.100976                |
|         |                          |         |                          | 1.015   | -55.004198               | 1.015   | -55.100947                |
|         |                          |         |                          | 1.014   | -55.004160               | 1.014   | -55.100916                |
|         |                          |         |                          | 1.013   | -55.004120               | 1.013   | -55.100883                |
|         |                          |         |                          | 1.012   | -55.004079               | 1.012   | -55.100849                |
|         |                          |         |                          | 1.011   | -55.004036               | 1.011   | -55.100814                |
|         |                          |         |                          | 1.010   | -55.003992               | 1.010   | -55.100776                |
|         |                          |         |                          | 1.000   | -55.003459               | 1.000   | -55.100308                |
|         |                          |         |                          | 0.990   | -55.002754               | 0.990   | -55.099661                |
|         |                          |         |                          | 0.980   | -55.001865               | 0.980   | -55.098825                |
|         |                          |         |                          | 0.970   | -55.000780               | 0.970   | -55.097788                |
|         |                          |         |                          | 0.960   | -54.999485               | 0.960   | -55.096536                |
|         |                          |         |                          | 0.950   | -54.997968               | 0.950   | -55.095056                |

Continued on next page



Table S5 – Continued from previous page

| $d$ (Å) | $E$ CASSCF<br>(Hartrees) | $d$ (Å) | $E$ CASPT2<br>(Hartrees) | $d$ (Å) | $E$ PNOF7s<br>(Hartrees) | $d$ (Å) | $E$ NOF-MP2<br>(Hartrees) |
|---------|--------------------------|---------|--------------------------|---------|--------------------------|---------|---------------------------|
|         |                          |         |                          | 0.940   | -54.996213               | 0.940   | -55.093334                |
|         |                          |         |                          | 0.930   | -54.994204               | 0.930   | -55.091354                |
|         |                          |         |                          | 0.920   | -54.991925               | 0.920   | -55.089100                |
|         |                          |         |                          | 0.910   | -54.989358               | 0.910   | -55.086555                |
|         |                          |         |                          | 0.900   | -54.986485               | 0.900   | -55.083699                |
|         |                          |         |                          | 0.890   | -54.983286               | 0.890   | -55.080514                |
|         |                          |         |                          | 0.880   | -54.979740               | 0.880   | -55.076980                |
|         |                          |         |                          | 0.870   | -54.975825               | 0.870   | -55.073073                |
|         |                          |         |                          | 0.860   | -54.971517               | 0.860   | -55.068770                |
|         |                          |         |                          | 0.850   | -54.966790               | 0.850   | -55.064047                |
|         |                          |         |                          | 0.840   | -54.961620               | 0.840   | -55.058877                |
|         |                          |         |                          | 0.830   | -54.955976               | 0.830   | -55.053232                |
|         |                          |         |                          | 0.820   | -54.949830               | 0.820   | -55.047082                |
|         |                          |         |                          | 0.810   | -54.943149               | 0.810   | -55.040395                |
|         |                          |         |                          | 0.800   | -54.935899               | 0.800   | -55.033137                |
|         |                          |         |                          | 0.790   | -54.928044               | 0.790   | -55.025272                |
|         |                          |         |                          | 0.780   | -54.919546               | 0.780   | -55.016762                |
|         |                          |         |                          | 0.770   | -54.910363               | 0.770   | -55.007566                |
|         |                          |         |                          | 0.760   | -54.900451               | 0.760   | -54.997640                |
|         |                          |         |                          | 0.750   | -54.889765               | 0.750   | -54.986937                |
|         |                          |         |                          | 0.740   | -54.878255               | 0.740   | -54.975408                |
|         |                          |         |                          | 0.730   | -54.865867               | 0.730   | -54.963000                |
|         |                          |         |                          | 0.720   | -54.852545               | 0.720   | -54.949656                |
|         |                          |         |                          | 0.710   | -54.838229               | 0.710   | -54.935316                |
|         |                          |         |                          | 0.700   | -54.822853               | 0.700   | -54.919915                |

Table S6 Potential energy surface of NF

| $d$ (Å) | $E$ CASSCF<br>(Hartrees) | $d$ (Å) | $E$ CASPT2<br>(Hartrees) | $d$ (Å) | $E$ PNOF7s<br>(Hartrees) | $d$ (Å) | $E$ NOF-MP2<br>(Hartrees) |
|---------|--------------------------|---------|--------------------------|---------|--------------------------|---------|---------------------------|
| 5.000   | -153.840244              | 5.000   | -154.117010              | 5.000   | -153.842956              | 5.000   | -154.071152               |
| 4.900   | -153.840245              | 4.900   | -154.117013              | 4.900   | -153.842956              | 4.900   | -154.071139               |
| 4.800   | -153.840245              | 4.800   | -154.117015              | 4.800   | -153.842957              | 4.800   | -154.071130               |
| 4.700   | -153.840246              | 4.700   | -154.117018              | 4.700   | -153.842959              | 4.700   | -154.071125               |
| 4.600   | -153.840247              | 4.600   | -154.117023              | 4.600   | -153.842961              | 4.600   | -154.071123               |
| 4.500   | -153.840249              | 4.500   | -154.117028              | 4.500   | -153.842963              | 4.500   | -154.071128               |
| 4.400   | -153.840252              | 4.400   | -154.117035              | 4.400   | -153.842967              | 4.400   | -154.071141               |
| 4.300   | -153.840256              | 4.300   | -154.117045              | 4.300   | -153.842972              | 4.300   | -154.071179               |
| 4.200   | -153.840261              | 4.200   | -154.117062              | 4.200   | -153.842979              | 4.200   | -154.071208               |
| 4.100   | -153.840267              | 4.100   | -154.117077              | 4.100   | -153.842987              | 4.100   | -154.071260               |
| 4.000   | -153.840275              | 4.000   | -154.117106              | 4.000   | -153.842997              | 4.000   | -154.071321               |
| 3.900   | -153.840285              | 3.900   | -154.117131              | 3.900   | -153.843009              | 3.900   | -154.071394               |
| 3.800   | -153.840298              | 3.800   | -154.117162              | 3.800   | -153.843023              | 3.800   | -154.071483               |
| 3.700   | -153.840313              | 3.700   | -154.117201              | 3.700   | -153.843041              | 3.700   | -154.071588               |
| 3.600   | -153.840333              | 3.600   | -154.117250              | 3.600   | -153.843062              | 3.600   | -154.071720               |
| 3.500   | -153.840357              | 3.500   | -154.117312              | 3.500   | -153.843091              | 3.500   | -154.071879               |
| 3.400   | -153.840388              | 3.400   | -154.117391              | 3.400   | -153.843129              | 3.400   | -154.072054               |
| 3.300   | -153.840430              | 3.300   | -154.117495              | 3.300   | -153.843182              | 3.300   | -154.072258               |
| 3.200   | -153.840486              | 3.200   | -154.117631              | 3.200   | -153.843256              | 3.200   | -154.072494               |
| 3.100   | -153.840563              | 3.100   | -154.117813              | 3.100   | -153.843361              | 3.100   | -154.072749               |
| 3.000   | -153.840670              | 3.000   | -154.118059              | 3.000   | -153.843510              | 3.000   | -154.073027               |
| 2.900   | -153.840818              | 2.900   | -154.118395              | 2.900   | -153.843720              | 2.900   | -154.073323               |
| 2.800   | -153.841026              | 2.800   | -154.118859              | 2.800   | -153.844018              | 2.800   | -154.073636               |
| 2.700   | -153.841322              | 2.700   | -154.119504              | 2.700   | -153.844437              | 2.700   | -154.073973               |
| 2.600   | -153.841749              | 2.600   | -154.120415              | 2.600   | -153.845023              | 2.600   | -154.074367               |
| 2.500   | -153.842382              | 2.500   | -154.121713              | 2.500   | -153.845838              | 2.500   | -154.074883               |
| 2.400   | -153.843351              | 2.400   | -154.123627              | 2.400   | -153.846975              | 2.400   | -154.075675               |
| 2.300   | -153.844883              | 2.300   | -154.126363              | 2.300   | -153.848558              | 2.300   | -154.077016               |

Continued on next page

Table S6 – Continued from previous page

| $d$ (Å) | $E$ CASSCF<br>(Hartrees) | $d$ (Å) | $E$ CASPT2<br>(Hartrees) | $d$ (Å) | $E$ PNOF7s<br>(Hartrees) | $d$ (Å) | $E$ NOF-MP2<br>(Hartrees) |
|---------|--------------------------|---------|--------------------------|---------|--------------------------|---------|---------------------------|
| 2.200   | -153.847360              | 2.200   | -154.130323              | 2.200   | -153.850748              | 2.200   | -154.079378               |
| 2.100   | -153.851380              | 2.100   | -154.135946              | 2.100   | -153.853736              | 2.100   | -154.083433               |
| 2.000   | -153.857712              | 2.000   | -154.143642              | 2.000   | -153.857733              | 2.000   | -154.090030               |
| 1.900   | -153.867051              | 1.900   | -154.153720              | 1.900   | -153.862942              | 1.900   | -154.099968               |
| 1.800   | -153.879574              | 1.800   | -154.166285              | 1.800   | -153.869483              | 1.800   | -154.113492               |
| 1.700   | -153.894668              | 1.700   | -154.181061              | 1.700   | -153.877257              | 1.700   | -154.129863               |
| 1.600   | -153.910945              | 1.600   | -154.197144              | 1.600   | -153.885752              | 1.600   | -154.147194               |
| 1.500   | -153.926271              | 1.500   | -154.212776              | 1.590   | -153.886604              | 1.590   | -154.148884               |
| 1.480   | -153.928969              | 1.480   | -154.215616              | 1.580   | -153.887451              | 1.580   | -154.150560               |
| 1.460   | -153.931476              | 1.460   | -154.218295              | 1.570   | -153.888292              | 1.570   | -154.152208               |
| 1.440   | -153.933758              | 1.440   | -154.220780              | 1.560   | -153.889124              | 1.560   | -154.153821               |
| 1.420   | -153.935775              | 1.420   | -154.223032              | 1.550   | -153.889947              | 1.550   | -154.155420               |
| 1.400   | -153.937487              | 1.400   | -154.225010              | 1.540   | -153.890757              | 1.540   | -154.156987               |
| 1.380   | -153.938845              | 1.380   | -154.226667              | 1.530   | -153.891554              | 1.530   | -154.158515               |
| 1.360   | -153.939797              | 1.360   | -154.227952              | 1.520   | -153.892334              | 1.520   | -154.160014               |
| 1.340   | -153.940284              | 1.340   | -154.228806              | 1.510   | -153.893097              | 1.510   | -154.161469               |
| 1.339   | -153.940295              | 1.339   | -154.228836              | 1.500   | -153.893839              | 1.500   | -154.162877               |
| 1.338   | -153.940304              | 1.338   | -154.228865              | 1.490   | -153.894558              | 1.490   | -154.164250               |
| 1.337   | -153.940313              | 1.337   | -154.228893              | 1.480   | -153.895251              | 1.480   | -154.165571               |
| 1.336   | -153.940320              | 1.336   | -154.228919              | 1.470   | -153.895916              | 1.470   | -154.166836               |
| 1.335   | -153.940325              | 1.335   | -154.228945              | 1.460   | -153.896549              | 1.460   | -154.168043               |
| 1.334   | -153.940329              | 1.334   | -154.228969              | 1.450   | -153.897146              | 1.450   | -154.169189               |
| 1.333   | -153.940332              | 1.333   | -154.228991              | 1.440   | -153.897705              | 1.440   | -154.170268               |
| 1.332   | -153.940334              | 1.332   | -154.229013              | 1.430   | -153.898221              | 1.430   | -154.171273               |
| 1.331   | -153.940334              | 1.331   | -154.229033              | 1.420   | -153.898690              | 1.420   | -154.172212               |
| 1.330   | -153.940332              | 1.330   | -154.229051              | 1.410   | -153.899106              | 1.410   | -154.173063               |
| 1.329   | -153.940330              | 1.329   | -154.229069              | 1.400   | -153.899465              | 1.400   | -154.173829               |
| 1.328   | -153.940325              | 1.328   | -154.229085              | 1.390   | -153.899760              | 1.390   | -154.174501               |
| 1.327   | -153.940320              | 1.327   | -154.229099              | 1.380   | -153.899986              | 1.380   | -154.175075               |
| 1.326   | -153.940313              | 1.326   | -154.229113              | 1.370   | -153.900135              | 1.370   | -154.175539               |
| 1.325   | -153.940304              | 1.325   | -154.229125              | 1.360   | -153.900201              | 1.360   | -154.175895               |
| 1.324   | -153.940294              | 1.324   | -154.229135              | 1.350   | -153.900175              | 1.350   | -154.176129               |
| 1.323   | -153.940283              | 1.323   | -154.229145              | 1.349   | -153.900164              | 1.349   | -154.175659               |
| 1.322   | -153.940270              | 1.322   | -154.229152              | 1.348   | -153.900172              | 1.348   | -154.175696               |
| 1.321   | -153.940255              | 1.321   | -154.229159              | 1.347   | -153.900179              | 1.347   | -154.175732               |
| 1.320   | -153.940239              | 1.320   | -154.229164              | 1.346   | -153.900185              | 1.346   | -154.175767               |
| 1.319   | -153.940222              | 1.319   | -154.229167              | 1.345   | -153.900190              | 1.345   | -154.175801               |
| 1.318   | -153.940203              | 1.318   | -154.229169              | 1.344   | -153.900195              | 1.344   | -154.175833               |
| 1.317   | -153.940182              | 1.317   | -154.229170              | 1.343   | -153.900198              | 1.343   | -154.175865               |
| 1.316   | -153.940160              | 1.316   | -154.229170              | 1.342   | -153.900201              | 1.342   | -154.175895               |
| 1.315   | -153.940137              | 1.315   | -154.229167              | 1.341   | -153.900203              | 1.341   | -154.175924               |
| 1.314   | -153.940112              | 1.314   | -154.229164              | 1.340   | -153.900203              | 1.340   | -154.175952               |
| 1.313   | -153.940085              | 1.313   | -154.229158              | 1.339   | -153.900203              | 1.339   | -154.175978               |
| 1.311   | -153.940027              | 1.311   | -154.229144              | 1.338   | -153.900202              | 1.338   | -154.176004               |
| 1.310   | -153.939995              | 1.310   | -154.229134              | 1.337   | -153.900200              | 1.337   | -154.176028               |
| 1.309   | -153.939962              | 1.309   | -154.229123              | 1.336   | -153.900197              | 1.336   | -154.176051               |
| 1.308   | -153.939927              | 1.308   | -154.229110              | 1.335   | -153.900193              | 1.335   | -154.176072               |
| 1.307   | -153.939891              | 1.307   | -154.229096              | 1.334   | -153.900188              | 1.334   | -154.176093               |
| 1.306   | -153.939853              | 1.306   | -154.229080              | 1.333   | -153.900182              | 1.333   | -154.176112               |
| 1.305   | -153.939813              | 1.305   | -154.229062              | 1.332   | -153.900175              | 1.332   | -154.176129               |
| 1.304   | -153.939772              | 1.304   | -154.229043              | 1.331   | -153.900167              | 1.331   | -154.176146               |
| 1.303   | -153.939729              | 1.303   | -154.229023              | 1.330   | -153.900158              | 1.330   | -154.176161               |
| 1.302   | -153.939684              | 1.302   | -154.229001              | 1.329   | -153.900149              | 1.329   | -154.176175               |
| 1.301   | -153.939637              | 1.301   | -154.228977              | 1.328   | -153.900138              | 1.328   | -154.176188               |
| 1.300   | -153.939589              | 1.300   | -154.228952              | 1.327   | -153.900126              | 1.327   | -154.176199               |
| 1.299   | -153.939539              | 1.299   | -154.228924              | 1.326   | -153.900113              | 1.326   | -154.176209               |
| 1.298   | -153.939488              | 1.298   | -154.228896              | 1.325   | -153.900099              | 1.325   | -154.176218               |
| 1.297   | -153.939435              | 1.297   | -154.228865              | 1.324   | -153.900083              | 1.324   | -154.176225               |
| 1.296   | -153.939379              | 1.296   | -154.228833              | 1.323   | -153.900067              | 1.323   | -154.176230               |

Continued on next page

Table S6 – Continued from previous page

| $d$ (Å) | $E$ CASSCF<br>(Hartrees) | $d$ (Å) | $E$ CASPT2<br>(Hartrees) | $d$ (Å) | $E$ PNOF7s<br>(Hartrees) | $d$ (Å) | $E$ NOF-MP2<br>(Hartrees) |
|---------|--------------------------|---------|--------------------------|---------|--------------------------|---------|---------------------------|
| 1.295   | -153.939323              | 1.295   | -154.228800              | 1.322   | -153.900050              | 1.322   | -154.176232               |
| 1.294   | -153.939264              | 1.294   | -154.228764              | 1.321   | -153.899816              | 1.321   | -154.176204               |
| 1.293   | -153.939204              | 1.293   | -154.228727              | 1.320   | -153.899465              | 1.320   | -154.176032               |
| 1.292   | -153.939141              | 1.292   | -154.228689              | 1.310   | -153.898985              | 1.310   | -154.175708               |
| 1.291   | -153.939077              | 1.291   | -154.228648              | 1.300   | -153.898367              | 1.300   | -154.175223               |
| 1.290   | -153.939011              | 1.290   | -154.228606              | 1.290   | -153.897600              | 1.290   | -154.174566               |
| 1.289   | -153.938944              | 1.289   | -154.228562              | 1.280   | -153.896671              | 1.280   | -154.173727               |
| 1.288   | -153.938874              | 1.288   | -154.228516              | 1.270   | -153.895568              | 1.270   | -154.172695               |
| 1.287   | -153.938803              | 1.287   | -154.228469              | 1.260   | -153.894278              | 1.260   | -154.171459               |
| 1.286   | -153.938730              | 1.286   | -154.228419              | 1.250   | -153.892786              | 1.250   | -154.170004               |
| 1.285   | -153.938654              | 1.285   | -154.228368              | 1.240   | -153.891077              | 1.240   | -154.168320               |
| 1.284   | -153.938577              | 1.284   | -154.228315              | 1.230   | -153.889135              | 1.230   | -154.166390               |
| 1.283   | -153.938498              | 1.283   | -154.228261              | 1.220   | -153.886944              | 1.220   | -154.164199               |
| 1.282   | -153.938417              | 1.282   | -154.228204              | 1.210   | -153.884485              | 1.210   | -154.161732               |
| 1.281   | -153.938335              | 1.281   | -154.228146              | 1.200   | -153.881740              | 1.200   | -154.158970               |
| 1.280   | -153.938250              | 1.280   | -154.228086              | 1.190   | -153.878688              | 1.190   | -154.155895               |
| 1.260   | -153.936126              | 1.260   | -154.226473              | 1.180   | -153.875307              | 1.180   | -154.152486               |
| 1.240   | -153.933112              | 1.240   | -154.224005              | 1.170   | -153.871574              | 1.170   | -154.148722               |
| 1.220   | -153.929085              | 1.220   | -154.220562              | 1.160   | -153.867466              | 1.160   | -154.144581               |
| 1.200   | -153.923909              | 1.200   | -154.216006              | 1.150   | -153.862957              | 1.150   | -154.140038               |
| 1.180   | -153.917429              | 1.180   | -154.210183              | 1.140   | -153.858018              | 1.140   | -154.135066               |
| 1.160   | -153.909469              | 1.160   | -154.202917              | 1.130   | -153.852622              | 1.130   | -154.129638               |
| 1.140   | -153.899832              | 1.140   | -154.194007              | 1.120   | -153.846737              | 1.120   | -154.123724               |
| 1.120   | -153.888292              | 1.120   | -154.183228              | 1.110   | -153.840330              | 1.110   | -154.117292               |
| 1.100   | -153.874596              | 1.100   | -154.170325              | 1.100   | -153.833366              | 1.100   | -154.110309               |
|         |                          | 1.080   | -154.155009              |         |                          | 1.000   | -154.000900               |
|         |                          | 1.060   | -154.136951              |         |                          |         |                           |
|         |                          | 1.040   | -154.115780              |         |                          |         |                           |
|         |                          | 1.020   | -154.091078              |         |                          |         |                           |
|         |                          | 1.000   | -154.062369              |         |                          |         |                           |

Table S7 Potential energy surface of PH

| $d$ (Å) | $E$ CASSCF<br>(Hartrees) | $d$ (Å) | $E$ CASPT2<br>(Hartrees) | $d$ (Å) | $E$ PNOF7s<br>(Hartrees) | $d$ (Å) | $E$ NOF-MP2<br>(Hartrees) |
|---------|--------------------------|---------|--------------------------|---------|--------------------------|---------|---------------------------|
| 5.000   | -341.215810              | 5.000   | -341.312213              | 5.000   | -341.218586              | 5.000   | -341.284538               |
| 4.800   | -341.215818              | 4.800   | -341.312233              | 4.900   | -341.218592              | 4.900   | -341.284594               |
| 4.600   | -341.215832              | 4.600   | -341.312265              | 4.800   | -341.218600              | 4.800   | -341.284658               |
| 4.500   | -341.215842              | 4.500   | -341.312287              | 4.700   | -341.218610              | 4.700   | -341.284731               |
| 4.400   | -341.215854              | 4.400   | -341.312315              | 4.600   | -341.218624              | 4.600   | -341.284815               |
| 4.300   | -341.215871              | 4.300   | -341.312351              | 4.500   | -341.218642              | 4.500   | -341.284907               |
| 4.200   | -341.215894              | 4.200   | -341.312397              | 4.400   | -341.218666              | 4.400   | -341.285004               |
| 4.100   | -341.215924              | 4.100   | -341.312456              | 4.300   | -341.218699              | 4.300   | -341.285116               |
| 4.000   | -341.215964              | 4.000   | -341.312533              | 4.200   | -341.218742              | 4.200   | -341.285231               |
| 3.900   | -341.216018              | 3.900   | -341.312633              | 4.100   | -341.218801              | 4.100   | -341.285349               |
| 3.800   | -341.216090              | 3.800   | -341.312765              | 4.000   | -341.218880              | 4.000   | -341.285469               |
| 3.700   | -341.216188              | 3.700   | -341.312936              | 3.900   | -341.218985              | 3.900   | -341.285588               |
| 3.600   | -341.216318              | 3.600   | -341.313162              | 3.800   | -341.219126              | 3.800   | -341.285702               |
| 3.500   | -341.216494              | 3.500   | -341.313460              | 3.700   | -341.219314              | 3.700   | -341.285804               |
| 3.400   | -341.216731              | 3.400   | -341.313852              | 3.600   | -341.219563              | 3.600   | -341.285894               |
| 3.300   | -341.217052              | 3.300   | -341.314371              | 3.500   | -341.219893              | 3.500   | -341.285970               |
| 3.200   | -341.217487              | 3.200   | -341.315058              | 3.400   | -341.220327              | 3.400   | -341.286034               |
| 3.100   | -341.218081              | 3.100   | -341.315973              | 3.300   | -341.220896              | 3.300   | -341.286103               |
| 3.000   | -341.218895              | 3.000   | -341.317186              | 3.200   | -341.221640              | 3.200   | -341.286199               |
| 2.900   | -341.220011              | 2.900   | -341.318793              | 3.100   | -341.222609              | 3.100   | -341.286372               |
| 2.800   | -341.221540              | 2.800   | -341.320906              | 3.000   | -341.223861              | 3.000   | -341.286696               |
| 2.700   | -341.223617              | 2.700   | -341.323658              | 2.900   | -341.225470              | 2.900   | -341.287286               |
| 2.600   | -341.226402              | 2.600   | -341.327189              | 2.800   | -341.227520              | 2.800   | -341.288299               |

Continued on next page

Table S7 – Continued from previous page

| $d$ (Å) | $E$ CASSCF<br>(Hartrees) | $d$ (Å) | $E$ CASPT2<br>(Hartrees) | $d$ (Å) | $E$ PNOF7s<br>(Hartrees) | $d$ (Å) | $E$ NOF-MP2<br>(Hartrees) |
|---------|--------------------------|---------|--------------------------|---------|--------------------------|---------|---------------------------|
| 2.500   | -341.230062              | 2.500   | -341.331639              | 2.700   | -341.230107              | 2.700   | -341.289936               |
| 2.400   | -341.234742              | 2.400   | -341.337129              | 2.600   | -341.233332              | 2.600   | -341.292429               |
| 2.300   | -341.240539              | 2.300   | -341.343744              | 2.500   | -341.237297              | 2.500   | -341.296024               |
| 2.200   | -341.247480              | 2.200   | -341.351510              | 2.400   | -341.242095              | 2.400   | -341.300932               |
| 2.100   | -341.255506              | 2.100   | -341.360375              | 2.300   | -341.247799              | 2.300   | -341.307297               |
| 2.000   | -341.264462              | 2.000   | -341.370193              | 2.200   | -341.254442              | 2.200   | -341.315155               |
| 1.900   | -341.274077              | 1.900   | -341.380693              | 2.100   | -341.262004              | 2.100   | -341.324414               |
| 1.880   | -341.276045              | 1.880   | -341.382841              | 2.000   | -341.270390              | 2.000   | -341.334842               |
| 1.860   | -341.278019              | 1.860   | -341.384995              | 1.900   | -341.279398              | 1.900   | -341.346082               |
| 1.840   | -341.279994              | 1.840   | -341.387152              | 1.800   | -341.288688              | 1.800   | -341.357664               |
| 1.820   | -341.281965              | 1.820   | -341.389305              | 1.700   | -341.297725              | 1.700   | -341.368998               |
| 1.800   | -341.283926              | 1.800   | -341.391450              | 1.600   | -341.305675              | 1.600   | -341.379170               |
| 1.780   | -341.285873              | 1.780   | -341.393581              | 1.440   | -341.312336              | 1.440   | -341.391757               |
| 1.760   | -341.287797              | 1.760   | -341.395690              | 1.430   | -341.312404              | 1.430   | -341.392053               |
| 1.740   | -341.289692              | 1.740   | -341.397770              | 1.429   | -341.312407              | 1.429   | -341.392073               |
| 1.720   | -341.291550              | 1.720   | -341.399815              | 1.428   | -341.312409              | 1.428   | -341.392092               |
| 1.700   | -341.293364              | 1.700   | -341.401815              | 1.427   | -341.312411              | 1.427   | -341.392108               |
| 1.680   | -341.295123              | 1.680   | -341.403762              | 1.426   | -341.312411              | 1.426   | -341.392123               |
| 1.660   | -341.296818              | 1.660   | -341.405646              | 1.425   | -341.312411              | 1.425   | -341.392137               |
| 1.640   | -341.298438              | 1.640   | -341.407455              | 1.424   | -341.312410              | 1.424   | -341.392147               |
| 1.620   | -341.299973              | 1.620   | -341.409179              | 1.423   | -341.312409              | 1.423   | -341.392154               |
| 1.600   | -341.301408              | 1.600   | -341.410805              | 1.422   | -341.312406              | 1.422   | -341.392159               |
| 1.580   | -341.302730              | 1.580   | -341.412319              | 1.421   | -341.312403              | 1.421   | -341.392169               |
| 1.560   | -341.303925              | 1.560   | -341.413706              | 1.420   | -341.312399              | 1.420   | -341.392189               |
| 1.540   | -341.304976              | 1.540   | -341.414949              | 1.400   | -341.312152              | 1.400   | -341.392140               |
| 1.520   | -341.305865              | 1.520   | -341.416032              | 1.390   | -341.311902              | 1.390   | -341.391970               |
| 1.500   | -341.306574              | 1.500   | -341.416935              | 1.380   | -341.311562              | 1.380   | -341.391702               |
| 1.480   | -341.307082              | 1.480   | -341.417638              | 1.370   | -341.311127              | 1.370   | -341.391335               |
| 1.460   | -341.307366              | 1.460   | -341.418117              | 1.360   | -341.310593              | 1.360   | -341.390866               |
| 1.440   | -341.307401              | 1.440   | -341.418349              | 1.350   | -341.309956              | 1.350   | -341.390291               |
| 1.439   | -341.307396              | 1.439   | -341.418355              | 1.340   | -341.309211              | 1.340   | -341.389606               |
| 1.438   | -341.307390              | 1.438   | -341.418359              | 1.330   | -341.308352              | 1.330   | -341.388807               |
| 1.437   | -341.307384              | 1.437   | -341.418362              | 1.320   | -341.307374              | 1.320   | -341.387888               |
| 1.436   | -341.307376              | 1.436   | -341.418364              | 1.310   | -341.306271              | 1.310   | -341.386844               |
| 1.435   | -341.307368              | 1.435   | -341.418366              | 1.300   | -341.305039              | 1.300   | -341.385670               |
| 1.434   | -341.307360              | 1.434   | -341.418367              | 1.200   | -341.284093              | 1.200   | -341.365282               |
| 1.433   | -341.307350              | 1.433   | -341.418368              | 1.100   | -341.241475              | 1.100   | -341.323050               |
| 1.432   | -341.307340              | 1.432   | -341.418367              | 1.000   | -341.164863              | 1.000   | -341.246402               |
| 1.431   | -341.307329              | 1.431   | -341.418366              |         |                          |         |                           |
| 1.430   | -341.307318              | 1.430   | -341.418365              |         |                          |         |                           |
| 1.429   | -341.307306              | 1.429   | -341.418362              |         |                          |         |                           |
| 1.428   | -341.307293              | 1.428   | -341.418359              |         |                          |         |                           |
| 1.427   | -341.307279              | 1.427   | -341.418355              |         |                          |         |                           |
| 1.426   | -341.307264              | 1.426   | -341.418350              |         |                          |         |                           |
| 1.425   | -341.307249              | 1.425   | -341.418345              |         |                          |         |                           |
| 1.424   | -341.307233              | 1.424   | -341.418339              |         |                          |         |                           |
| 1.423   | -341.307217              | 1.423   | -341.418332              |         |                          |         |                           |
| 1.422   | -341.307199              | 1.422   | -341.418324              |         |                          |         |                           |
| 1.421   | -341.307181              | 1.421   | -341.418316              |         |                          |         |                           |
| 1.420   | -341.307162              | 1.420   | -341.418307              |         |                          |         |                           |
| 1.419   | -341.307142              | 1.419   | -341.418297              |         |                          |         |                           |
| 1.418   | -341.307122              | 1.418   | -341.418287              |         |                          |         |                           |
| 1.417   | -341.307101              | 1.417   | -341.418275              |         |                          |         |                           |
| 1.416   | -341.307079              | 1.416   | -341.418263              |         |                          |         |                           |
| 1.415   | -341.307056              | 1.415   | -341.418250              |         |                          |         |                           |
| 1.414   | -341.307033              | 1.414   | -341.418236              |         |                          |         |                           |
| 1.413   | -341.307008              | 1.413   | -341.418222              |         |                          |         |                           |
| 1.412   | -341.306983              | 1.412   | -341.418207              |         |                          |         |                           |
| 1.411   | -341.306957              | 1.411   | -341.418191              |         |                          |         |                           |

Continued on next page

Table S7 – Continued from previous page

| $d$ (Å) | $E$ CASSCF<br>(Hartrees) | $d$ (Å) | $E$ CASPT2<br>(Hartrees) | $d$ (Å) | $E$ PNOF7s<br>(Hartrees) | $d$ (Å) | $E$ NOF-MP2<br>(Hartrees) |
|---------|--------------------------|---------|--------------------------|---------|--------------------------|---------|---------------------------|
| 1.410   | -341.306931              | 1.410   | -341.418174              |         |                          |         |                           |
| 1.409   | -341.306903              | 1.409   | -341.418156              |         |                          |         |                           |
| 1.408   | -341.306875              | 1.408   | -341.418138              |         |                          |         |                           |
| 1.407   | -341.306846              | 1.407   | -341.418118              |         |                          |         |                           |
| 1.406   | -341.306816              | 1.406   | -341.418098              |         |                          |         |                           |
| 1.405   | -341.306785              | 1.405   | -341.418077              |         |                          |         |                           |
| 1.404   | -341.306754              | 1.404   | -341.418056              |         |                          |         |                           |
| 1.403   | -341.306721              | 1.403   | -341.418033              |         |                          |         |                           |
| 1.402   | -341.306688              | 1.402   | -341.418010              |         |                          |         |                           |
| 1.401   | -341.306654              | 1.401   | -341.417986              |         |                          |         |                           |
| 1.400   | -341.306619              | 1.400   | -341.417961              |         |                          |         |                           |
| 1.380   | -341.305741              | 1.380   | -341.417277              |         |                          |         |                           |
| 1.360   | -341.304494              | 1.360   | -341.416227              |         |                          |         |                           |
| 1.340   | -341.302841              | 1.340   | -341.414769              |         |                          |         |                           |
| 1.320   | -341.300741              | 1.320   | -341.412867              |         |                          |         |                           |
| 1.300   | -341.298151              | 1.300   | -341.410472              |         |                          |         |                           |
| 1.280   | -341.295022              | 1.280   | -341.407537              |         |                          |         |                           |
| 1.260   | -341.291304              | 1.260   | -341.404011              |         |                          |         |                           |
| 1.240   | -341.286939              | 1.240   | -341.399835              |         |                          |         |                           |
| 1.200   | -341.276018              | 1.200   | -341.389285              |         |                          |         |                           |
| 1.180   | -341.269321              | 1.180   | -341.382768              |         |                          |         |                           |
| 1.160   | -341.261697              | 1.160   | -341.375318              |         |                          |         |                           |
| 1.140   | -341.253058              | 1.140   | -341.366846              |         |                          |         |                           |
| 1.120   | -341.243308              | 1.120   | -341.357254              |         |                          |         |                           |
| 1.100   | -341.232343              | 1.100   | -341.346436              |         |                          |         |                           |
| 1.000   | -341.154785              | 1.000   | -341.269429              |         |                          |         |                           |

Table S8 Potential energy surface of CF

| $d$ (Å) | $E$ CASSCF<br>(Hartrees) | $d$ (Å) | $E$ CASPT2<br>(Hartrees) | $d$ (Å) | $E$ PNOF7s<br>(Hartrees) | $d$ (Å) | $E$ NOF-MP2<br>(Hartrees) |
|---------|--------------------------|---------|--------------------------|---------|--------------------------|---------|---------------------------|
| 5.000   | -137.148775              | 5.000   | -137.382479              | 5.000   | -137.176483              | 5.000   | -137.408481               |
| 4.900   | -137.148781              | 4.900   | -137.382490              | 4.900   | -137.176489              | 4.900   | -137.408529               |
| 4.800   | -137.148789              | 4.800   | -137.382501              | 4.800   | -137.176495              | 4.800   | -137.408572               |
| 4.700   | -137.148798              | 4.700   | -137.382516              | 4.700   | -137.176503              | 4.700   | -137.408628               |
| 4.600   | -137.148809              | 4.600   | -137.382533              | 4.600   | -137.176513              | 4.600   | -137.408699               |
| 4.500   | -137.148823              | 4.500   | -137.382554              | 4.500   | -137.176524              | 4.500   | -137.408780               |
| 4.400   | -137.148840              | 4.400   | -137.382579              | 4.400   | -137.176538              | 4.400   | -137.408889               |
| 4.300   | -137.148860              | 4.300   | -137.382611              | 4.300   | -137.176553              | 4.300   | -137.409013               |
| 4.200   | -137.148885              | 4.200   | -137.382650              | 4.200   | -137.176572              | 4.200   | -137.409160               |
| 4.100   | -137.148917              | 4.100   | -137.382700              | 4.100   | -137.176594              | 4.100   | -137.409341               |
| 4.000   | -137.148956              | 4.000   | -137.382762              | 4.000   | -137.176622              | 4.000   | -137.409545               |
| 3.900   | -137.149006              | 3.900   | -137.382842              | 3.900   | -137.176656              | 3.900   | -137.409784               |
| 3.800   | -137.149071              | 3.800   | -137.382946              | 3.800   | -137.176699              | 3.800   | -137.410061               |
| 3.700   | -137.149155              | 3.700   | -137.383080              | 3.700   | -137.176755              | 3.700   | -137.410370               |
| 3.600   | -137.149266              | 3.600   | -137.383256              | 3.600   | -137.176827              | 3.600   | -137.410727               |
| 3.500   | -137.149413              | 3.500   | -137.383489              | 3.500   | -137.176923              | 3.500   | -137.411121               |
| 3.400   | -137.149612              | 3.400   | -137.383802              | 3.400   | -137.177049              | 3.400   | -137.411557               |
| 3.300   | -137.149881              | 3.300   | -137.384214              | 3.300   | -137.177217              | 3.300   | -137.412026               |
| 3.200   | -137.150251              | 3.200   | -137.384782              | 3.200   | -137.177441              | 3.200   | -137.412523               |
| 3.100   | -137.150765              | 3.100   | -137.385567              | 3.100   | -137.177743              | 3.100   | -137.413032               |
| 3.000   | -137.151486              | 3.000   | -137.386625              | 3.000   | -137.178150              | 3.000   | -137.413553               |
| 2.900   | -137.152515              | 2.900   | -137.388171              | 2.900   | -137.178699              | 2.900   | -137.414076               |
| 2.800   | -137.154002              | 2.800   | -137.390288              | 2.800   | -137.179442              | 2.800   | -137.414602               |
| 2.700   | -137.156183              | 2.700   | -137.393267              | 2.700   | -137.180446              | 2.700   | -137.415156               |
| 2.600   | -137.159410              | 2.600   | -137.397419              | 2.600   | -137.181803              | 2.600   | -137.415810               |
| 2.500   | -137.164174              | 2.500   | -137.403043              | 2.500   | -137.183632              | 2.500   | -137.416697               |
| 2.400   | -137.171044              | 2.400   | -137.410311              | 2.400   | -137.186091              | 2.400   | -137.418064               |

Continued on next page

Table S8 – Continued from previous page

| $d$ (Å) | $E$ CASSCF<br>(Hartrees) | $d$ (Å) | $E$ CASPT2<br>(Hartrees) | $d$ (Å) | $E$ PNOF7s<br>(Hartrees) | $d$ (Å) | $E$ NOF-MP2<br>(Hartrees) |
|---------|--------------------------|---------|--------------------------|---------|--------------------------|---------|---------------------------|
| 2.300   | -137.180458              | 2.300   | -137.419321              | 2.300   | -137.189382              | 2.300   | -137.420326               |
| 2.200   | -137.192544              | 2.200   | -137.430284              | 2.200   | -137.193787              | 2.200   | -137.424185               |
| 2.100   | -137.207133              | 2.100   | -137.443409              | 2.100   | -137.199699              | 2.100   | -137.430762               |
| 2.000   | -137.223911              | 2.000   | -137.458762              | 2.000   | -137.207668              | 2.000   | -137.441744               |
| 1.900   | -137.242523              | 1.900   | -137.476207              | 1.900   | -137.218337              | 1.900   | -137.458644               |
| 1.800   | -137.262563              | 1.800   | -137.495424              | 1.800   | -137.232002              | 1.800   | -137.480089               |
| 1.700   | -137.283497              | 1.700   | -137.515896              | 1.700   | -137.248077              | 1.700   | -137.502391               |
| 1.600   | -137.304523              | 1.600   | -137.536827              | 1.600   | -137.265395              | 1.600   | -137.523672               |
| 1.580   | -137.308637              | 1.580   | -137.540965              | 1.500   | -137.282382              | 1.500   | -137.542812               |
| 1.560   | -137.312691              | 1.560   | -137.545061              | 1.400   | -137.296561              | 1.400   | -137.557873               |
| 1.540   | -137.316670              | 1.540   | -137.549097              | 1.390   | -137.297680              | 1.390   | -137.559030               |
| 1.520   | -137.320555              | 1.520   | -137.553057              | 1.380   | -137.298723              | 1.380   | -137.560106               |
| 1.500   | -137.324328              | 1.500   | -137.556921              | 1.370   | -137.299684              | 1.370   | -137.561095               |
| 1.480   | -137.327965              | 1.480   | -137.560667              | 1.360   | -137.300558              | 1.360   | -137.561990               |
| 1.460   | -137.331442              | 1.460   | -137.564270              | 1.350   | -137.301336              | 1.350   | -137.562786               |
| 1.440   | -137.334728              | 1.440   | -137.567702              | 1.340   | -137.302012              | 1.340   | -137.563474               |
| 1.420   | -137.337793              | 1.420   | -137.570931              | 1.330   | -137.302577              | 1.330   | -137.564049               |
| 1.400   | -137.340599              | 1.400   | -137.573920              | 1.320   | -137.303023              | 1.320   | -137.564502               |
| 1.380   | -137.343102              | 1.380   | -137.576628              | 1.310   | -137.303340              | 1.310   | -137.564822               |
| 1.360   | -137.345257              | 1.360   | -137.579007              | 1.300   | -137.303520              | 1.300   | -137.565004               |
| 1.340   | -137.347008              | 1.340   | -137.581004              | 1.299   | -137.303530              | 1.299   | -137.565015               |
| 1.320   | -137.348293              | 1.320   | -137.582556              | 1.298   | -137.303538              | 1.298   | -137.565024               |
| 1.300   | -137.349043              | 1.300   | -137.583596              | 1.297   | -137.303545              | 1.297   | -137.565031               |
| 1.299   | -137.349065              | 1.299   | -137.583633              | 1.296   | -137.303551              | 1.296   | -137.565037               |
| 1.298   | -137.349086              | 1.298   | -137.583669              | 1.295   | -137.303555              | 1.295   | -137.565041               |
| 1.297   | -137.349105              | 1.297   | -137.583703              | 1.294   | -137.303557              | 1.294   | -137.565043               |
| 1.296   | -137.349122              | 1.296   | -137.583736              | 1.293   | -137.303558              | 1.293   | -137.565044               |
| 1.295   | -137.349138              | 1.295   | -137.583767              | 1.292   | -137.303557              | 1.292   | -137.565044               |
| 1.294   | -137.349152              | 1.294   | -137.583797              | 1.291   | -137.303555              | 1.291   | -137.565042               |
| 1.293   | -137.349165              | 1.293   | -137.583825              | 1.290   | -137.303551              | 1.290   | -137.565038               |
| 1.292   | -137.349176              | 1.292   | -137.583851              | 1.289   | -137.303546              | 1.289   | -137.565033               |
| 1.291   | -137.349185              | 1.291   | -137.583876              | 1.288   | -137.303539              | 1.288   | -137.565026               |
| 1.290   | -137.349193              | 1.290   | -137.583899              | 1.287   | -137.303530              | 1.287   | -137.565017               |
| 1.289   | -137.349199              | 1.289   | -137.583921              | 1.286   | -137.303520              | 1.286   | -137.565007               |
| 1.288   | -137.349203              | 1.288   | -137.583941              | 1.285   | -137.303508              | 1.285   | -137.564995               |
| 1.287   | -137.349206              | 1.287   | -137.583960              | 1.284   | -137.303495              | 1.284   | -137.564982               |
| 1.286   | -137.349207              | 1.286   | -137.583977              | 1.283   | -137.303479              | 1.283   | -137.564967               |
| 1.285   | -137.349206              | 1.285   | -137.583992              | 1.282   | -137.303463              | 1.282   | -137.564950               |
| 1.284   | -137.349204              | 1.284   | -137.584005              | 1.281   | -137.303444              | 1.281   | -137.564931               |
| 1.283   | -137.349200              | 1.283   | -137.584017              | 1.280   | -137.303424              | 1.280   | -137.564912               |
| 1.282   | -137.349194              | 1.282   | -137.584024              | 1.270   | -137.303126              | 1.270   | -137.564613               |
| 1.281   | -137.349187              | 1.281   | -137.584033              | 1.260   | -137.302645              | 1.260   | -137.564135               |
| 1.280   | -137.349178              | 1.280   | -137.584040              | 1.250   | -137.301968              | 1.250   | -137.563459               |
| 1.279   | -137.349167              | 1.279   | -137.584045              | 1.240   | -137.301081              | 1.240   | -137.562577               |
| 1.278   | -137.349154              | 1.278   | -137.584049              | 1.230   | -137.299970              | 1.230   | -137.561473               |
| 1.277   | -137.349139              | 1.277   | -137.584051              | 1.220   | -137.298619              | 1.220   | -137.560129               |
| 1.276   | -137.349123              | 1.276   | -137.584051              | 1.210   | -137.297012              | 1.210   | -137.558534               |
| 1.275   | -137.349105              | 1.275   | -137.584049              | 1.200   | -137.295130              | 1.200   | -137.556669               |
| 1.274   | -137.349085              | 1.274   | -137.584045              | 1.100   | -137.256495              | 1.100   | -137.518463               |
| 1.273   | -137.349063              | 1.273   | -137.584040              | 1.000   | -137.159686              | 1.000   | -137.423310               |
| 1.272   | -137.349039              | 1.272   | -137.584033              |         |                          |         |                           |
| 1.271   | -137.349014              | 1.271   | -137.584024              |         |                          |         |                           |
| 1.270   | -137.348986              | 1.270   | -137.584013              |         |                          |         |                           |
| 1.269   | -137.348957              | 1.269   | -137.584000              |         |                          |         |                           |
| 1.268   | -137.348926              | 1.268   | -137.583986              |         |                          |         |                           |
| 1.267   | -137.348893              | 1.267   | -137.583970              |         |                          |         |                           |
| 1.266   | -137.348858              | 1.266   | -137.583952              |         |                          |         |                           |
| 1.265   | -137.348821              | 1.265   | -137.583932              |         |                          |         |                           |
| 1.264   | -137.348782              | 1.264   | -137.583910              |         |                          |         |                           |

Continued on next page

Table S8 – Continued from previous page

| $d$ (Å) | $E$ CASSCF<br>(Hartrees) | $d$ (Å) | $E$ CASPT2<br>(Hartrees) | $d$ (Å) | $E$ PNOF7s<br>(Hartrees) | $d$ (Å) | $E$ NOF-MP2<br>(Hartrees) |
|---------|--------------------------|---------|--------------------------|---------|--------------------------|---------|---------------------------|
| 1.263   | -137.348741              | 1.263   | -137.583886              |         |                          |         |                           |
| 1.262   | -137.348698              | 1.262   | -137.583861              |         |                          |         |                           |
| 1.261   | -137.348653              | 1.261   | -137.583833              |         |                          |         |                           |
| 1.260   | -137.348607              | 1.260   | -137.583803              |         |                          |         |                           |
| 1.259   | -137.348558              | 1.259   | -137.583772              |         |                          |         |                           |
| 1.258   | -137.348507              | 1.258   | -137.583738              |         |                          |         |                           |
| 1.257   | -137.348454              | 1.257   | -137.583703              |         |                          |         |                           |
| 1.256   | -137.348399              | 1.256   | -137.583665              |         |                          |         |                           |
| 1.255   | -137.348342              | 1.255   | -137.583626              |         |                          |         |                           |
| 1.254   | -137.348283              | 1.254   | -137.583584              |         |                          |         |                           |
| 1.253   | -137.348222              | 1.253   | -137.583541              |         |                          |         |                           |
| 1.252   | -137.348158              | 1.252   | -137.583495              |         |                          |         |                           |
| 1.251   | -137.348093              | 1.251   | -137.583448              |         |                          |         |                           |
| 1.250   | -137.348025              | 1.250   | -137.583398              |         |                          |         |                           |
| 1.249   | -137.347956              | 1.249   | -137.583346              |         |                          |         |                           |
| 1.248   | -137.347884              | 1.248   | -137.583292              |         |                          |         |                           |
| 1.247   | -137.347810              | 1.247   | -137.583236              |         |                          |         |                           |
| 1.246   | -137.347733              | 1.246   | -137.583178              |         |                          |         |                           |
| 1.245   | -137.347655              | 1.245   | -137.583117              |         |                          |         |                           |
| 1.244   | -137.347574              | 1.244   | -137.583055              |         |                          |         |                           |
| 1.243   | -137.347491              | 1.243   | -137.582990              |         |                          |         |                           |
| 1.242   | -137.347406              | 1.242   | -137.582923              |         |                          |         |                           |
| 1.241   | -137.347318              | 1.241   | -137.582854              |         |                          |         |                           |
| 1.240   | -137.347228              | 1.240   | -137.582783              |         |                          |         |                           |
| 1.230   | -137.346201              | 1.230   | -137.581941              |         |                          |         |                           |
| 1.220   | -137.344927              | 1.220   | -137.580860              |         |                          |         |                           |
| 1.210   | -137.343391              | 1.210   | -137.579519              |         |                          |         |                           |
| 1.200   | -137.341573              | 1.200   | -137.577905              |         |                          |         |                           |
| 1.190   | -137.339456              | 1.190   | -137.575996              |         |                          |         |                           |
| 1.180   | -137.337019              | 1.180   | -137.573772              |         |                          |         |                           |
| 1.170   | -137.334241              | 1.170   | -137.571213              |         |                          |         |                           |
| 1.160   | -137.331098              | 1.160   | -137.568294              |         |                          |         |                           |
| 1.150   | -137.327568              | 1.150   | -137.564993              |         |                          |         |                           |
| 1.140   | -137.323624              | 1.140   | -137.561282              |         |                          |         |                           |
| 1.130   | -137.319240              | 1.130   | -137.557134              |         |                          |         |                           |
| 1.120   | -137.314386              | 1.120   | -137.552521              |         |                          |         |                           |
| 1.110   | -137.309032              | 1.110   | -137.547412              |         |                          |         |                           |
| 1.100   | -137.303146              | 1.100   | -137.541774              |         |                          |         |                           |
| 1.090   | -137.296692              | 1.090   | -137.535571              |         |                          |         |                           |
| 1.080   | -137.289635              | 1.080   | -137.528768              |         |                          |         |                           |
| 1.070   | -137.281935              | 1.070   | -137.521324              |         |                          |         |                           |
| 1.060   | -137.273552              | 1.060   | -137.513199              |         |                          |         |                           |
| 1.050   | -137.264440              | 1.050   | -137.504348              |         |                          |         |                           |
| 1.040   | -137.254555              | 1.040   | -137.494724              |         |                          |         |                           |
| 1.030   | -137.243845              | 1.030   | -137.484276              |         |                          |         |                           |
| 1.020   | -137.232259              | 1.020   | -137.472951              |         |                          |         |                           |
| 1.010   | -137.219741              | 1.010   | -137.460693              |         |                          |         |                           |
| 1.000   | -137.206232              | 1.000   | -137.447442              |         |                          |         |                           |

Table S9 Potential energy surface of NO

| $d$ (Å) | $E$ CASSCF<br>(Hartrees) | $d$ (Å) | $E$ CASPT2<br>(Hartrees) | $d$ (Å) | $E$ PNOF7s<br>(Hartrees) | $d$ (Å) | $E$ NOF-MP2<br>(Hartrees) |
|---------|--------------------------|---------|--------------------------|---------|--------------------------|---------|---------------------------|
| 5.000   | -129.214715              | 5.000   | -129.473269              | 5.000   | -129.233463              | 5.000   | -129.424282               |
| 4.900   | -129.214716              | 4.900   | -129.473272              | 4.900   | -129.233465              | 4.900   | -129.424296               |
| 4.800   | -129.214717              | 4.800   | -129.473277              | 4.800   | -129.233467              | 4.800   | -129.424284               |
| 4.700   | -129.214719              | 4.700   | -129.473282              | 4.700   | -129.233469              | 4.700   | -129.424335               |
| 4.600   | -129.214721              | 4.600   | -129.473289              | 4.600   | -129.233473              | 4.600   | -129.424362               |

Continued on next page

Table S9 – Continued from previous page

| $d$ (Å) | $E$ CASSCF<br>(Hartrees) | $d$ (Å) | $E$ CASPT2<br>(Hartrees) | $d$ (Å) | $E$ PNOF7s<br>(Hartrees) | $d$ (Å) | $E$ NOF-MP2<br>(Hartrees) |
|---------|--------------------------|---------|--------------------------|---------|--------------------------|---------|---------------------------|
| 4.500   | -129.214724              | 4.500   | -129.473298              | 4.500   | -129.233477              | 4.500   | -129.424415               |
| 4.400   | -129.214728              | 4.400   | -129.473312              | 4.400   | -129.233482              | 4.400   | -129.424487               |
| 4.300   | -129.214733              | 4.300   | -129.473326              | 4.300   | -129.233488              | 4.300   | -129.424584               |
| 4.200   | -129.214739              | 4.200   | -129.473343              | 4.200   | -129.233496              | 4.200   | -129.424709               |
| 4.100   | -129.214746              | 4.100   | -129.473372              | 4.100   | -129.233504              | 4.100   | -129.424867               |
| 4.000   | -129.214755              | 4.000   | -129.473397              | 4.000   | -129.233513              | 4.000   | -129.425064               |
| 3.900   | -129.214764              | 3.900   | -129.473427              | 3.900   | -129.233523              | 3.900   | -129.425323               |
| 3.800   | -129.214775              | 3.800   | -129.473466              | 3.800   | -129.233535              | 3.800   | -129.425614               |
| 3.700   | -129.214788              | 3.700   | -129.473510              | 3.700   | -129.233549              | 3.700   | -129.425963               |
| 3.600   | -129.214802              | 3.600   | -129.473565              | 3.600   | -129.233566              | 3.600   | -129.426377               |
| 3.500   | -129.214820              | 3.500   | -129.473632              | 3.500   | -129.233590              | 3.500   | -129.426867               |
| 3.400   | -129.214842              | 3.400   | -129.473719              | 3.400   | -129.233621              | 3.400   | -129.427438               |
| 3.300   | -129.214871              | 3.300   | -129.473826              | 3.300   | -129.233666              | 3.300   | -129.428104               |
| 3.200   | -129.214909              | 3.200   | -129.473967              | 3.200   | -129.233728              | 3.200   | -129.428870               |
| 3.100   | -129.214959              | 3.100   | -129.474147              | 3.100   | -129.233816              | 3.100   | -129.429744               |
| 3.000   | -129.215026              | 3.000   | -129.474382              | 3.000   | -129.233938              | 3.000   | -129.430724               |
| 2.900   | -129.215114              | 2.900   | -129.474693              | 2.900   | -129.234107              | 2.900   | -129.431819               |
| 2.800   | -129.215232              | 2.800   | -129.475109              | 2.800   | -129.234338              | 2.800   | -129.433014               |
| 2.700   | -129.215392              | 2.700   | -129.475670              | 2.700   | -129.234650              | 2.700   | -129.434313               |
| 2.600   | -129.215619              | 2.600   | -129.476439              | 2.600   | -129.235074              | 2.600   | -129.435716               |
| 2.500   | -129.215962              | 2.500   | -129.477515              | 2.500   | -129.235654              | 2.500   | -129.437236               |
| 2.400   | -129.216515              | 2.400   | -129.479048              | 2.400   | -129.236454              | 2.400   | -129.438920               |
| 2.300   | -129.217453              | 2.300   | -129.481275              | 2.300   | -129.237565              | 2.300   | -129.440855               |
| 2.200   | -129.219098              | 2.200   | -129.484550              | 2.200   | -129.239114              | 2.200   | -129.443214               |
| 2.100   | -129.222010              | 2.100   | -129.489394              | 2.100   | -129.241283              | 2.100   | -129.446297               |
| 2.000   | -129.227096              | 2.000   | -129.496548              | 2.000   | -129.244353              | 2.000   | -129.450594               |
| 1.900   | -129.235656              | 1.900   | -129.507032              | 1.900   | -129.248762              | 1.900   | -129.456848               |
| 1.800   | -129.249243              | 1.800   | -129.522131              | 1.800   | -129.255191              | 1.800   | -129.466114               |
| 1.700   | -129.269205              | 1.700   | -129.542998              | 1.700   | -129.264626              | 1.700   | -129.479835               |
| 1.600   | -129.295991              | 1.600   | -129.569891              | 1.600   | -129.278320              | 1.600   | -129.499876               |
| 1.500   | -129.328570              | 1.500   | -129.601809              | 1.500   | -129.297457              | 1.500   | -129.527895               |
| 1.480   | -129.335574              | 1.480   | -129.608620              | 1.400   | -129.322133              | 1.400   | -129.563249               |
| 1.460   | -129.342677              | 1.460   | -129.615521              | 1.390   | -129.324832              | 1.390   | -129.567043               |
| 1.440   | -129.349845              | 1.440   | -129.622481              | 1.380   | -129.327556              | 1.380   | -129.570852               |
| 1.420   | -129.357040              | 1.420   | -129.629469              | 1.370   | -129.330301              | 1.370   | -129.574678               |
| 1.400   | -129.364219              | 1.400   | -129.636446              | 1.360   | -129.333059              | 1.360   | -129.578506               |
| 1.380   | -129.371334              | 1.380   | -129.643368              | 1.350   | -129.335824              | 1.350   | -129.582330               |
| 1.360   | -129.378332              | 1.360   | -129.650186              | 1.340   | -129.338589              | 1.340   | -129.586138               |
| 1.340   | -129.385150              | 1.340   | -129.656843              | 1.330   | -129.341344              | 1.330   | -129.589922               |
| 1.320   | -129.391722              | 1.320   | -129.663275              | 1.320   | -129.344082              | 1.320   | -129.593670               |
| 1.300   | -129.397969              | 1.300   | -129.669406              | 1.310   | -129.346793              | 1.310   | -129.597372               |
| 1.280   | -129.403804              | 1.280   | -129.675154              | 1.300   | -129.349466              | 1.300   | -129.601012               |
| 1.260   | -129.409128              | 1.260   | -129.680418              | 1.290   | -129.352090              | 1.290   | -129.604581               |
| 1.240   | -129.413829              | 1.240   | -129.685095              | 1.280   | -129.354654              | 1.280   | -129.608063               |
| 1.220   | -129.417781              | 1.220   | -129.689056              | 1.270   | -129.357144              | 1.270   | -129.611445               |
| 1.200   | -129.420841              | 1.200   | -129.692161              | 1.260   | -129.359546              | 1.260   | -129.614709               |
| 1.180   | -129.422850              | 1.180   | -129.694250              | 1.250   | -129.361846              | 1.250   | -129.617841               |
| 1.179   | -129.422919              | 1.179   | -129.694325              | 1.240   | -129.364028              | 1.240   | -129.620824               |
| 1.178   | -129.422986              | 1.178   | -129.694397              | 1.230   | -129.366075              | 1.230   | -129.623640               |
| 1.177   | -129.423049              | 1.177   | -129.694465              | 1.220   | -129.367969              | 1.220   | -129.626269               |
| 1.176   | -129.423109              | 1.176   | -129.694531              | 1.210   | -129.369690              | 1.210   | -129.628692               |
| 1.175   | -129.423167              | 1.175   | -129.694593              | 1.200   | -129.371218              | 1.200   | -129.630887               |
| 1.174   | -129.423220              | 1.174   | -129.694653              | 1.190   | -129.372530              | 1.190   | -129.632834               |
| 1.173   | -129.423271              | 1.173   | -129.694709              | 1.180   | -129.373604              | 1.180   | -129.634509               |
| 1.172   | -129.423319              | 1.172   | -129.694762              | 1.170   | -129.374415              | 1.170   | -129.635887               |
| 1.171   | -129.423363              | 1.171   | -129.694812              | 1.160   | -129.374935              | 1.160   | -129.636943               |
| 1.170   | -129.423404              | 1.170   | -129.694858              | 1.159   | -129.374970              | 1.159   | -129.637030               |
| 1.169   | -129.423441              | 1.169   | -129.694902              | 1.158   | -129.375002              | 1.158   | -129.637113               |
| 1.168   | -129.423475              | 1.168   | -129.694942              | 1.157   | -129.375031              | 1.157   | -129.637193               |

Continued on next page



Table S9 – Continued from previous page

| $d$ (Å) | $E$ CASSCF<br>(Hartrees) | $d$ (Å) | $E$ CASPT2<br>(Hartrees) | $d$ (Å) | $E$ PNOF7s<br>(Hartrees) | $d$ (Å) | $E$ NOF-MP2<br>(Hartrees) |
|---------|--------------------------|---------|--------------------------|---------|--------------------------|---------|---------------------------|
| 1.167   | -129.423506              | 1.167   | -129.694979              | 1.156   | -129.375056              | 1.156   | -129.637269               |
| 1.166   | -129.423533              | 1.166   | -129.695012              | 1.155   | -129.375078              | 1.155   | -129.637342               |
| 1.165   | -129.423557              | 1.165   | -129.695043              | 1.154   | -129.375097              | 1.154   | -129.637411               |
| 1.164   | -129.423578              | 1.164   | -129.695070              | 1.153   | -129.375112              | 1.153   | -129.637476               |
| 1.163   | -129.423595              | 1.163   | -129.695093              | 1.152   | -129.375124              | 1.152   | -129.637538               |
| 1.162   | -129.423609              | 1.162   | -129.695113              | 1.151   | -129.375133              | 1.151   | -129.637596               |
| 1.161   | -129.423619              | 1.161   | -129.695130              | 1.150   | -129.375138              | 1.150   | -129.637650               |
| 1.160   | -129.423625              | 1.160   | -129.695143              | 1.149   | -129.375139              | 1.149   | -129.637700               |
| 1.159   | -129.423628              | 1.159   | -129.695152              | 1.148   | -129.375138              | 1.148   | -129.637746               |
| 1.158   | -129.423627              | 1.158   | -129.695159              | 1.147   | -129.375132              | 1.147   | -129.637789               |
| 1.157   | -129.423623              | 1.157   | -129.695161              | 1.146   | -129.375123              | 1.146   | -129.637828               |
| 1.156   | -129.423615              | 1.156   | -129.695160              | 1.145   | -129.375111              | 1.145   | -129.637863               |
| 1.155   | -129.423603              | 1.155   | -129.695156              | 1.144   | -129.375094              | 1.144   | -129.637894               |
| 1.154   | -129.423587              | 1.154   | -129.695147              | 1.143   | -129.375075              | 1.143   | -129.637921               |
| 1.153   | -129.423568              | 1.153   | -129.695135              | 1.142   | -129.375051              | 1.142   | -129.637944               |
| 1.152   | -129.423545              | 1.152   | -129.695120              | 1.141   | -129.375024              | 1.141   | -129.637963               |
| 1.151   | -129.423518              | 1.151   | -129.695101              | 1.140   | -129.374993              | 1.140   | -129.637978               |
| 1.150   | -129.423488              | 1.150   | -129.695077              | 1.130   | -129.374469              | 1.130   | -129.637898               |
| 1.149   | -129.423453              | 1.149   | -129.695050              | 1.120   | -129.373533              | 1.120   | -129.637378               |
| 1.148   | -129.423415              | 1.148   | -129.695019              | 1.110   | -129.372149              | 1.110   | -129.636384               |
| 1.147   | -129.423372              | 1.147   | -129.694985              | 1.100   | -129.370280              | 1.100   | -129.634881               |
| 1.146   | -129.423326              | 1.146   | -129.694946              | 1.090   | -129.367887              | 1.090   | -129.632831               |
| 1.145   | -129.423276              | 1.145   | -129.694904              | 1.080   | -129.364928              | 1.080   | -129.630193               |
| 1.144   | -129.423221              | 1.144   | -129.694858              | 1.070   | -129.361359              | 1.070   | -129.626925               |
| 1.143   | -129.423163              | 1.143   | -129.694808              | 1.060   | -129.357133              | 1.060   | -129.622983               |
| 1.142   | -129.423101              | 1.142   | -129.694754              | 1.050   | -129.352201              | 1.050   | -129.618318               |
| 1.141   | -129.423034              | 1.141   | -129.694696              | 1.040   | -129.346511              | 1.040   | -129.612880               |
| 1.140   | -129.422964              | 1.140   | -129.694633              | 1.030   | -129.340007              | 1.030   | -129.606616               |
| 1.139   | -129.422889              | 1.139   | -129.694567              | 1.020   | -129.332631              | 1.020   | -129.599468               |
| 1.138   | -129.422810              | 1.138   | -129.694497              | 1.010   | -129.324321              | 1.010   | -129.591376               |
| 1.137   | -129.422727              | 1.137   | -129.694422              | 1.000   | -129.314175              | 1.000   | -129.582276               |
| 1.136   | -129.422639              | 1.136   | -129.694344              | 0.990   | -129.304032              | 0.990   | -129.571896               |
| 1.135   | -129.422547              | 1.135   | -129.694261              | 0.980   | -129.292743              | 0.980   | -129.560548               |
| 1.136   | -129.422639              | 1.136   | -129.694344              | 0.970   | -129.280227              | 0.970   | -129.547975               |
| 1.135   | -129.422547              | 1.135   | -129.694261              | 0.960   | -129.266403              | 0.960   | -129.534095               |
| 1.134   | -129.422451              | 1.134   | -129.694174              | 0.950   | -129.251183              | 0.950   | -129.518822               |
| 1.133   | -129.422351              | 1.133   | -129.694082              | 0.940   | -129.234473              | 0.940   | -129.502061               |
| 1.132   | -129.422246              | 1.132   | -129.693987              | 0.930   | -129.216174              | 0.930   | -129.483716               |
| 1.131   | -129.422137              | 1.131   | -129.693887              | 0.920   | -129.196180              | 0.920   | -129.463681               |
| 1.130   | -129.422023              | 1.130   | -129.693783              | 0.910   | -129.174381              | 0.910   | -129.441845               |
| 1.129   | -129.421905              | 1.129   | -129.693674              | 0.900   | -129.150656              | 0.900   | -129.418089               |
| 1.128   | -129.421783              | 1.128   | -129.693561              |         |                          |         |                           |
| 1.127   | -129.421656              | 1.127   | -129.693443              |         |                          |         |                           |
| 1.126   | -129.421524              | 1.126   | -129.693321              |         |                          |         |                           |
| 1.125   | -129.421387              | 1.125   | -129.693195              |         |                          |         |                           |
| 1.124   | -129.421247              | 1.124   | -129.693063              |         |                          |         |                           |
| 1.123   | -129.421101              | 1.123   | -129.692928              |         |                          |         |                           |
| 1.122   | -129.420951              | 1.122   | -129.692787              |         |                          |         |                           |
| 1.121   | -129.420796              | 1.121   | -129.692642              |         |                          |         |                           |
| 1.120   | -129.420636              | 1.120   | -129.692493              |         |                          |         |                           |
| 1.119   | -129.420471              | 1.119   | -129.692338              |         |                          |         |                           |
| 1.118   | -129.420302              | 1.118   | -129.692179              |         |                          |         |                           |
| 1.117   | -129.420127              | 1.117   | -129.692015              |         |                          |         |                           |
| 1.116   | -129.419948              | 1.116   | -129.691846              |         |                          |         |                           |
| 1.115   | -129.419764              | 1.115   | -129.691673              |         |                          |         |                           |
| 1.114   | -129.419575              | 1.114   | -129.691494              |         |                          |         |                           |
| 1.113   | -129.419380              | 1.113   | -129.691311              |         |                          |         |                           |
| 1.112   | -129.419181              | 1.112   | -129.691122              |         |                          |         |                           |
| 1.111   | -129.418977              | 1.111   | -129.690929              |         |                          |         |                           |

Continued on next page

Table S9 – Continued from previous page

| $d$ (Å) | $E$ CASSCF<br>(Hartrees) | $d$ (Å) | $E$ CASPT2<br>(Hartrees) | $d$ (Å) | $E$ PNOF7s<br>(Hartrees) | $d$ (Å) | $E$ NOF-MP2<br>(Hartrees) |
|---------|--------------------------|---------|--------------------------|---------|--------------------------|---------|---------------------------|
| 1.110   | -129.418767              | 1.110   | -129.690730              |         |                          |         |                           |
| 1.109   | -129.418553              | 1.109   | -129.690526              |         |                          |         |                           |
| 1.108   | -129.418333              | 1.108   | -129.690318              |         |                          |         |                           |
| 1.107   | -129.418108              | 1.107   | -129.690104              |         |                          |         |                           |
| 1.106   | -129.417878              | 1.106   | -129.689885              |         |                          |         |                           |
| 1.105   | -129.417642              | 1.105   | -129.689661              |         |                          |         |                           |
| 1.104   | -129.417401              | 1.104   | -129.689431              |         |                          |         |                           |
| 1.103   | -129.417155              | 1.103   | -129.689196              |         |                          |         |                           |
| 1.102   | -129.416903              | 1.102   | -129.688956              |         |                          |         |                           |
| 1.101   | -129.416646              | 1.101   | -129.688710              |         |                          |         |                           |
| 1.100   | -129.416383              | 1.100   | -129.688459              |         |                          |         |                           |
| 1.080   | -129.409915              | 1.080   | -129.682241              |         |                          |         |                           |
| 1.060   | -129.400905              | 1.060   | -129.673505              |         |                          |         |                           |
| 1.040   | -129.388984              | 1.040   | -129.661879              |         |                          |         |                           |
| 1.020   | -129.373738              | 1.020   | -129.646944              |         |                          |         |                           |
| 1.000   | -129.354701              | 1.000   | -129.628224              |         |                          |         |                           |
| 0.980   | -129.331345              | 0.980   | -129.605186              |         |                          |         |                           |
| 0.960   | -129.303078              | 0.960   | -129.577224              |         |                          |         |                           |
| 0.940   | -129.269228              | 0.940   | -129.543659              |         |                          |         |                           |
| 0.920   | -129.229038              | 0.920   | -129.503719              |         |                          |         |                           |
| 0.900   | -129.181648              | 0.900   | -129.456534              |         |                          |         |                           |
